# Supplementary material
Source: PubMed Central journal article supplement (PMC3455110)
Supplement: NIHMS395195-supplement-Supp_Figure_S1-S11_Table_S1-S4.pdf [file NIHMS395195-supplement-Supp_Figure_S1-S11_Table_S1-S4.pdf]

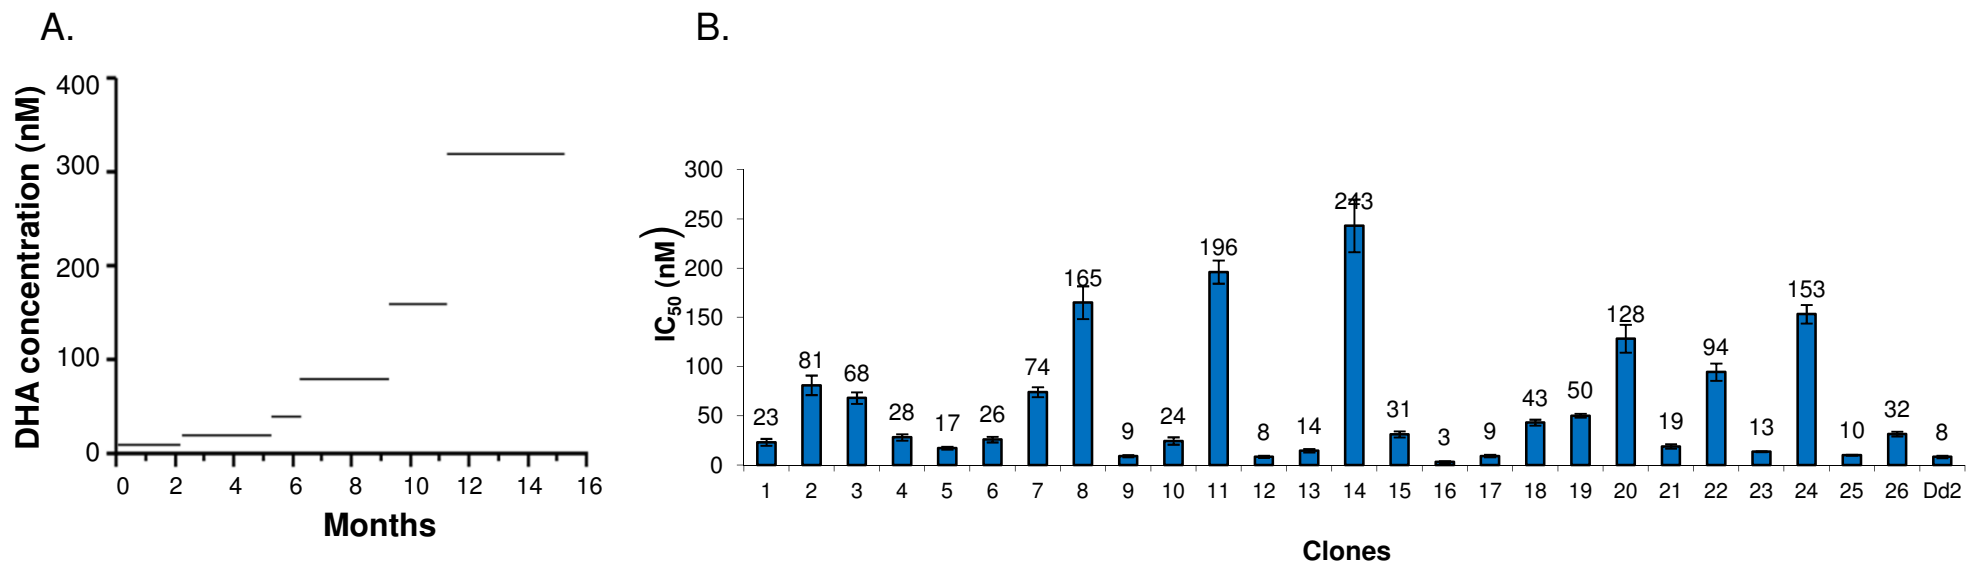

**Fig.S1. A. Selection scheme for dihydroartemisinin (DHA) resistance in Dd2 strain.** Dd2 parasites were subjected to step-wise selection with increasing DHA concentrations starting at 10 nM. When steady growth of parasites was achieved, DHA concentration was doubled. After 15 months, the parasite population was able to grow under constant exposure to 320 nM of DHA. **B. DHA IC<sub>50</sub> values of cloned parasites.** The DHA-resistant population was cloned in DHA-free medium in ~35 days. IC<sub>50</sub> values of the 26 clones to DHA were measured using the SYBR-Green I method. Shown are the mean IC<sub>50</sub>s of individual clones. Two clones (DHA1 and DHA2) with the highest DHA IC<sub>50</sub> values were selected for future studies.

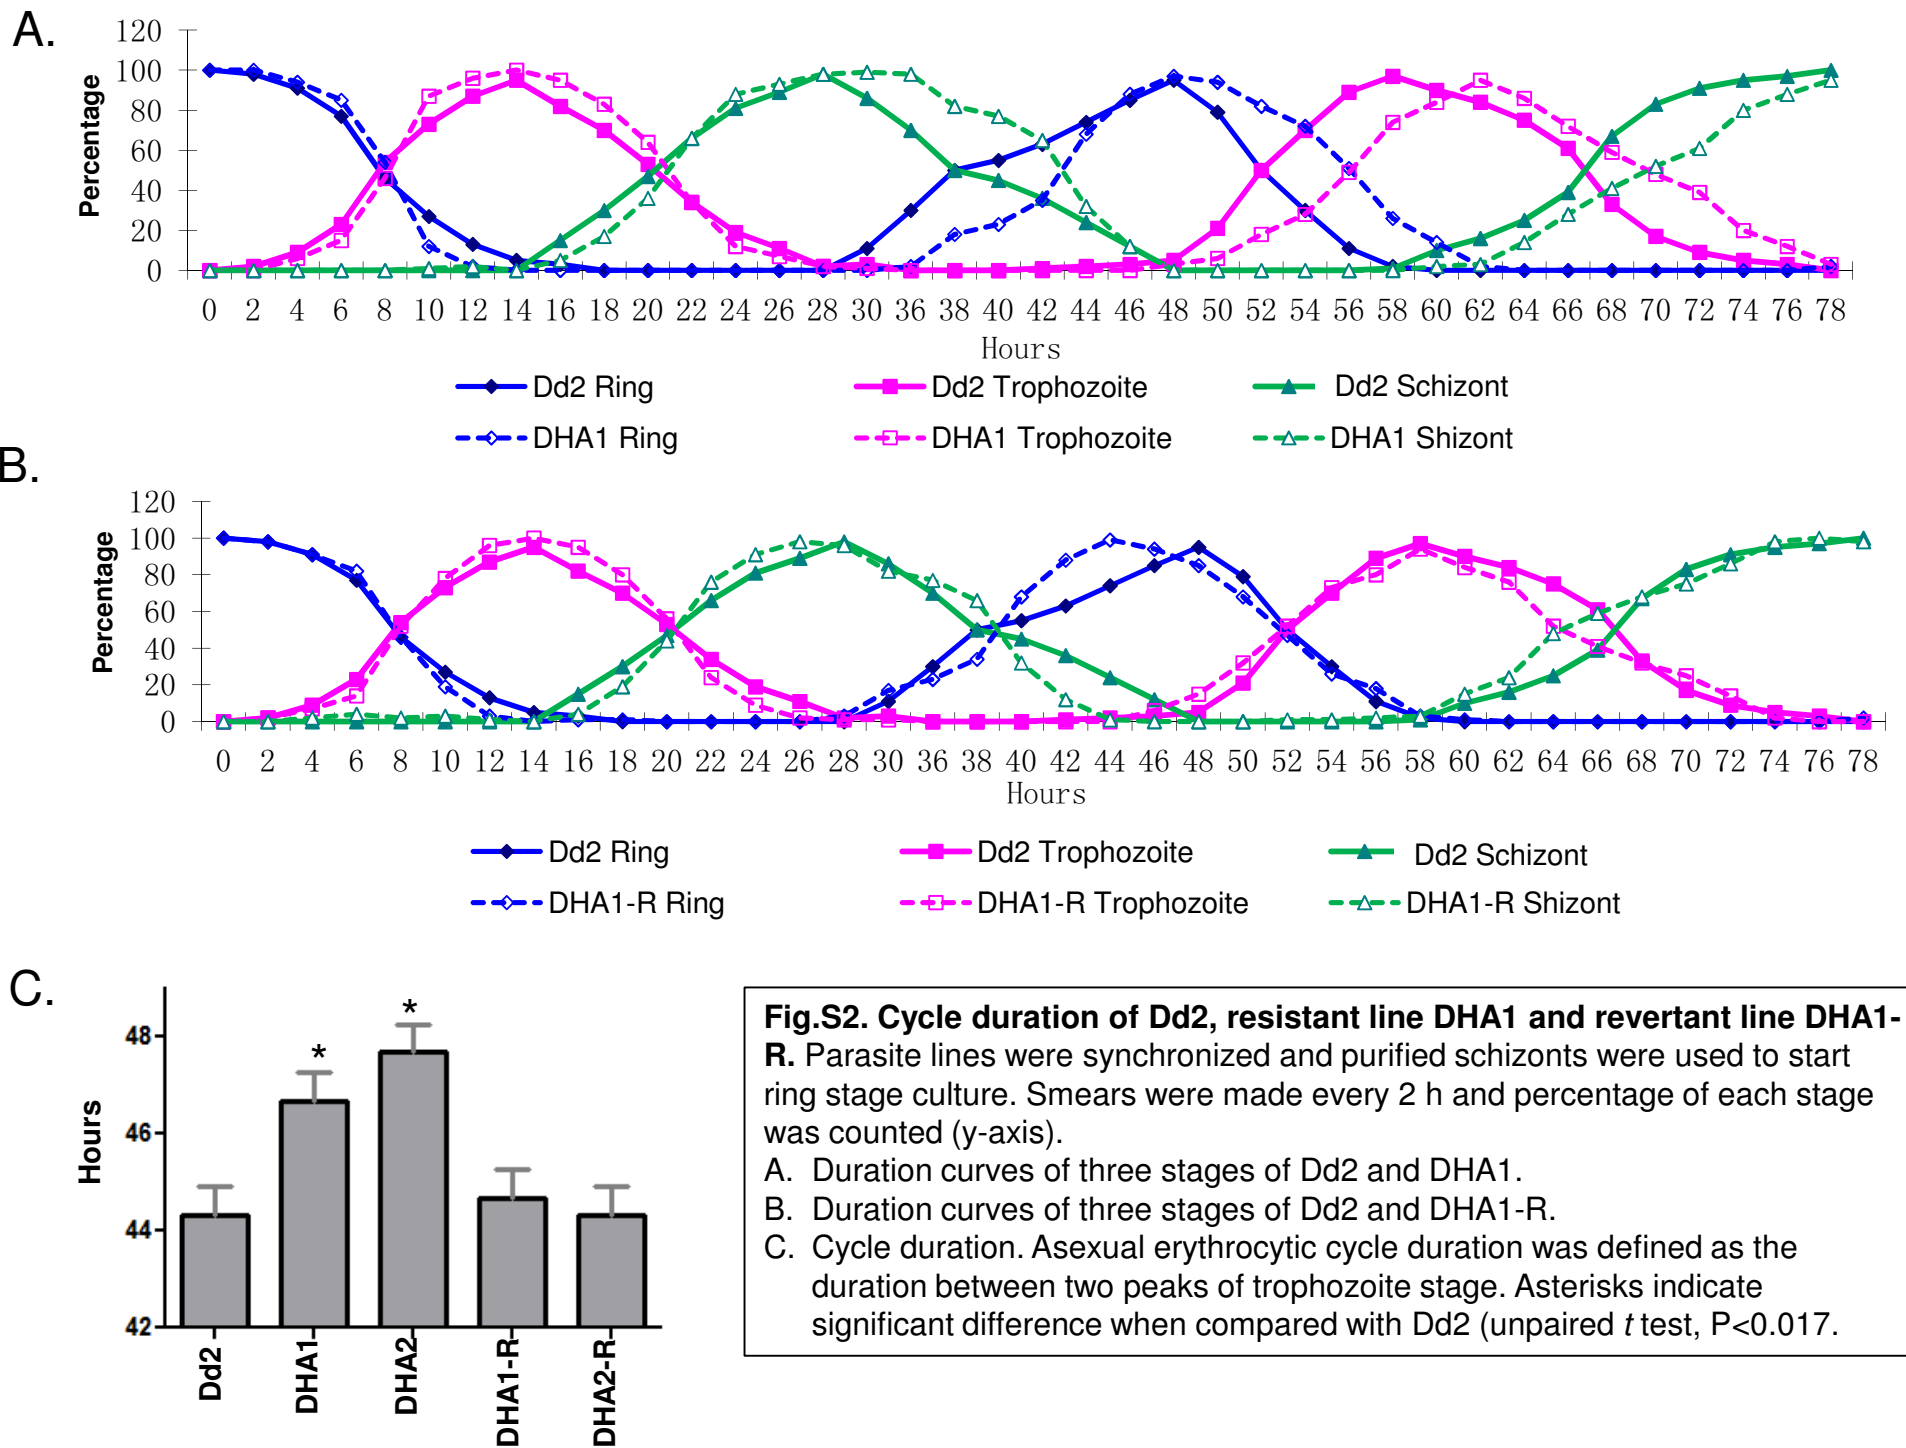

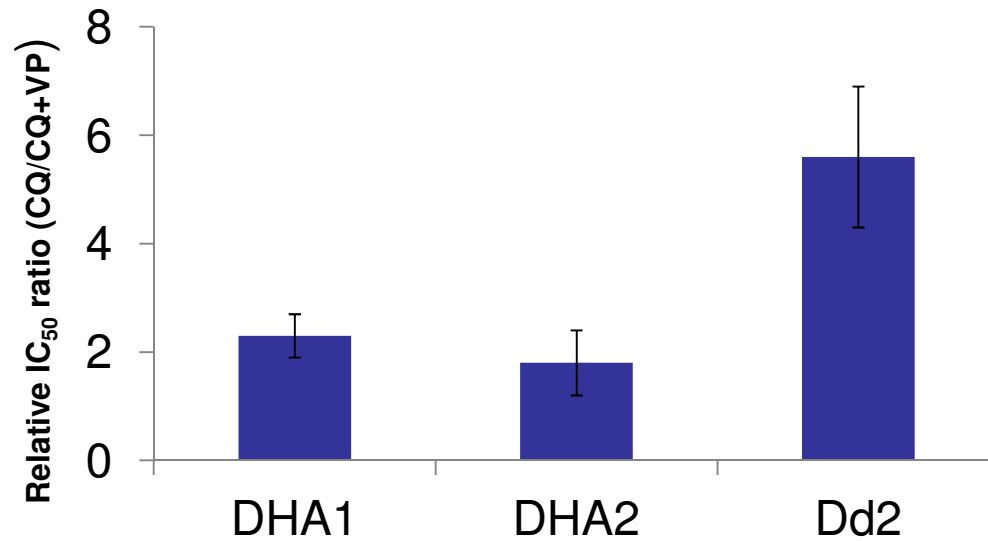

**Fig. S3. Relative IC<sub>50</sub> ratios of CQ in DHA1, DHA2 and Dd2 in the presence of verapamil (VP).** Relative ratio was calculated by comparing the IC<sub>50</sub> values of CQ alone with those of CQ/VP treatment. A CQ:VP ratio of 2:25  $\mu$ M was used for the assay. The VP concentrations used do not have obvious cytotoxic effect on the parasites (Patel et al. 2010).

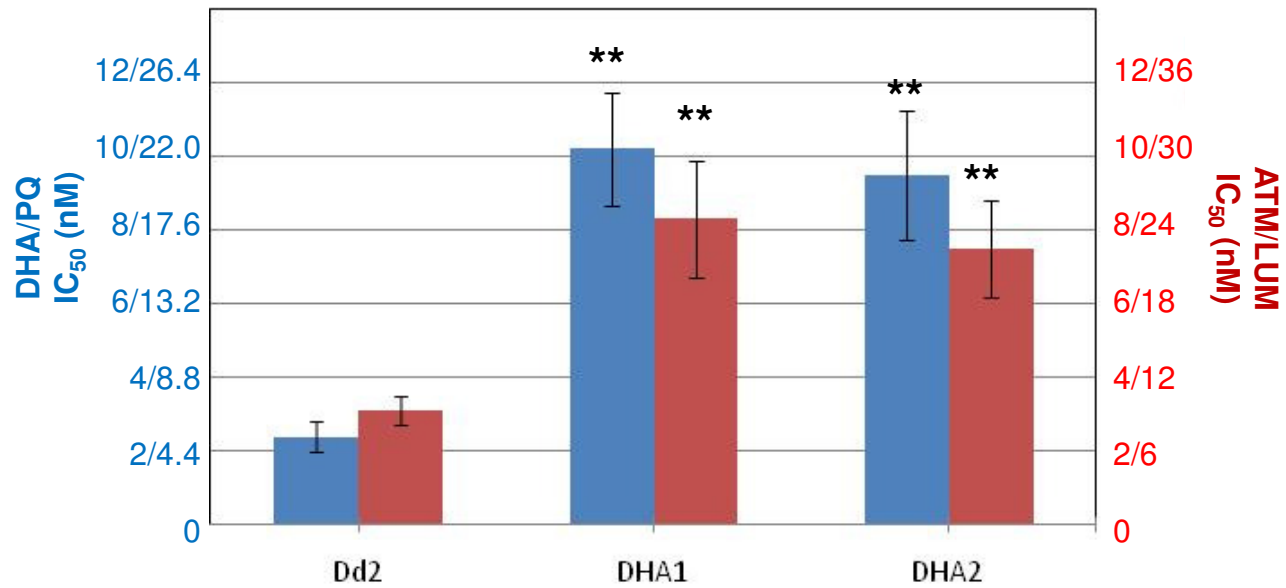

**Fig.S4. In vitro IC<sub>50</sub> values of Dd2, DHA1 and DHA2 to two ACTs: dihydroartemisinin with piperazine (DHA/PQ) (blue bars) and artemether with lumefantrine (ATM/LUM) (red bars).**  
 \*\* indicates significant difference between Dd2 and DHA1 or DHA2 (unpaired *t*-test, P<0.003)

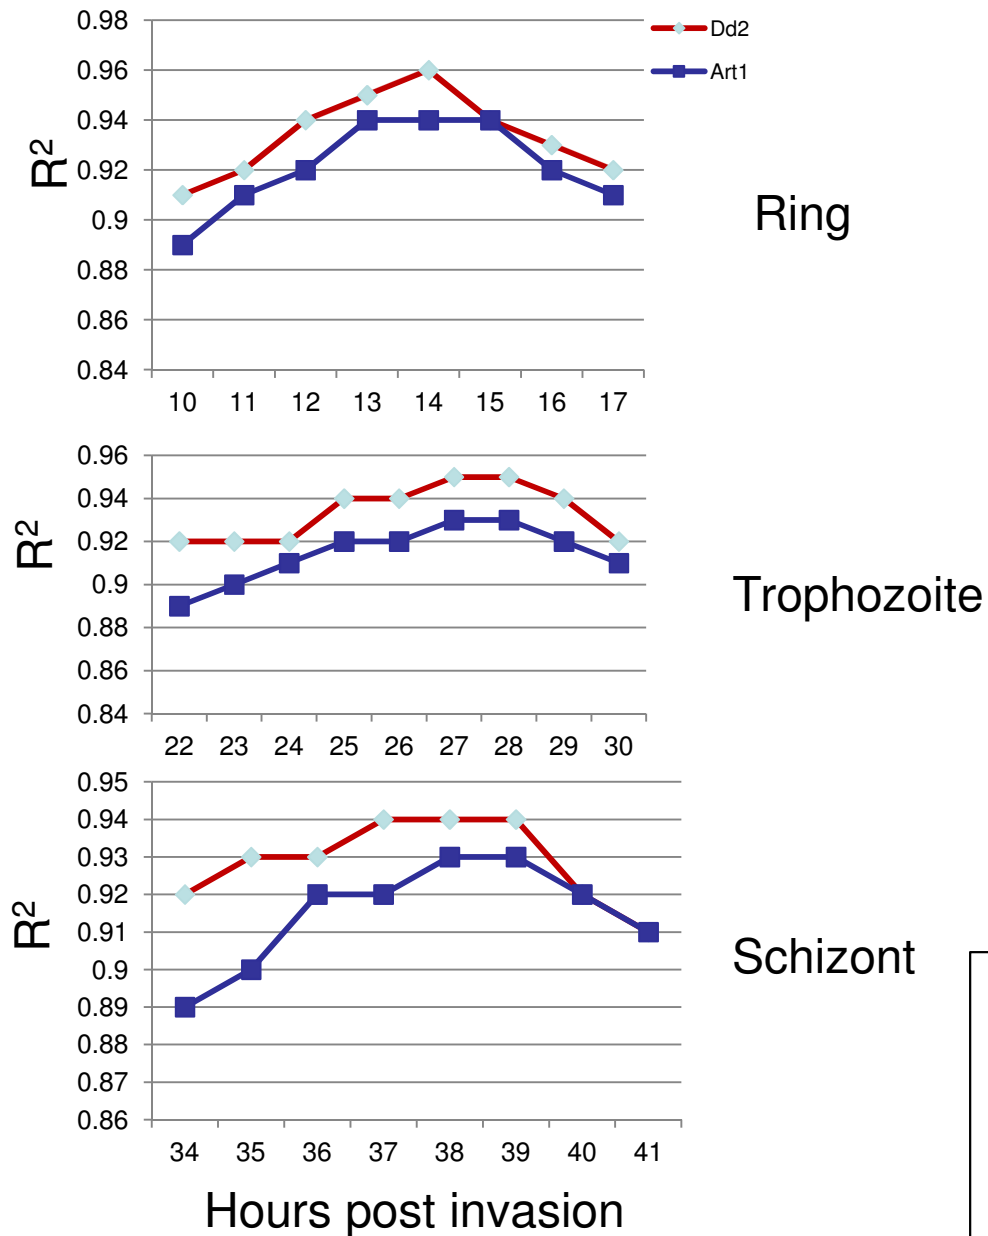

**Fig.S5. Correlations in microarray data between Dd2 and DHA1 at different time points with the published 48 h gene expression profile of Dd2 (Llinas et al. 2006).** Microarray data from two experiments were normalized, averaged, and  $\log_2$  transformed. Pearson correlation was performed between our microarray data and the published Dd2 gene expression profile.

A.

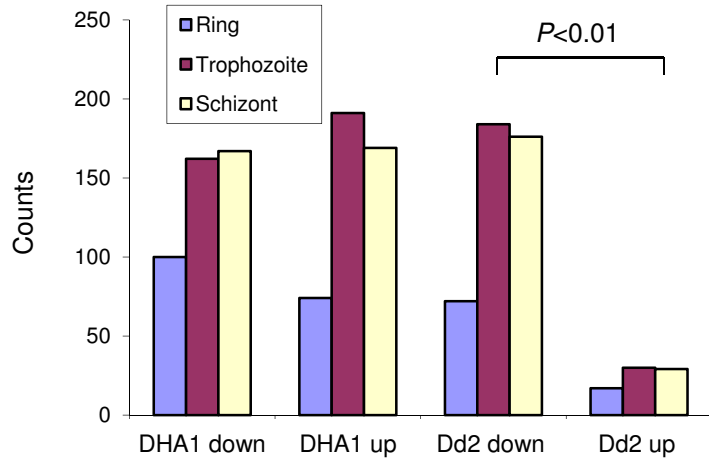

B.

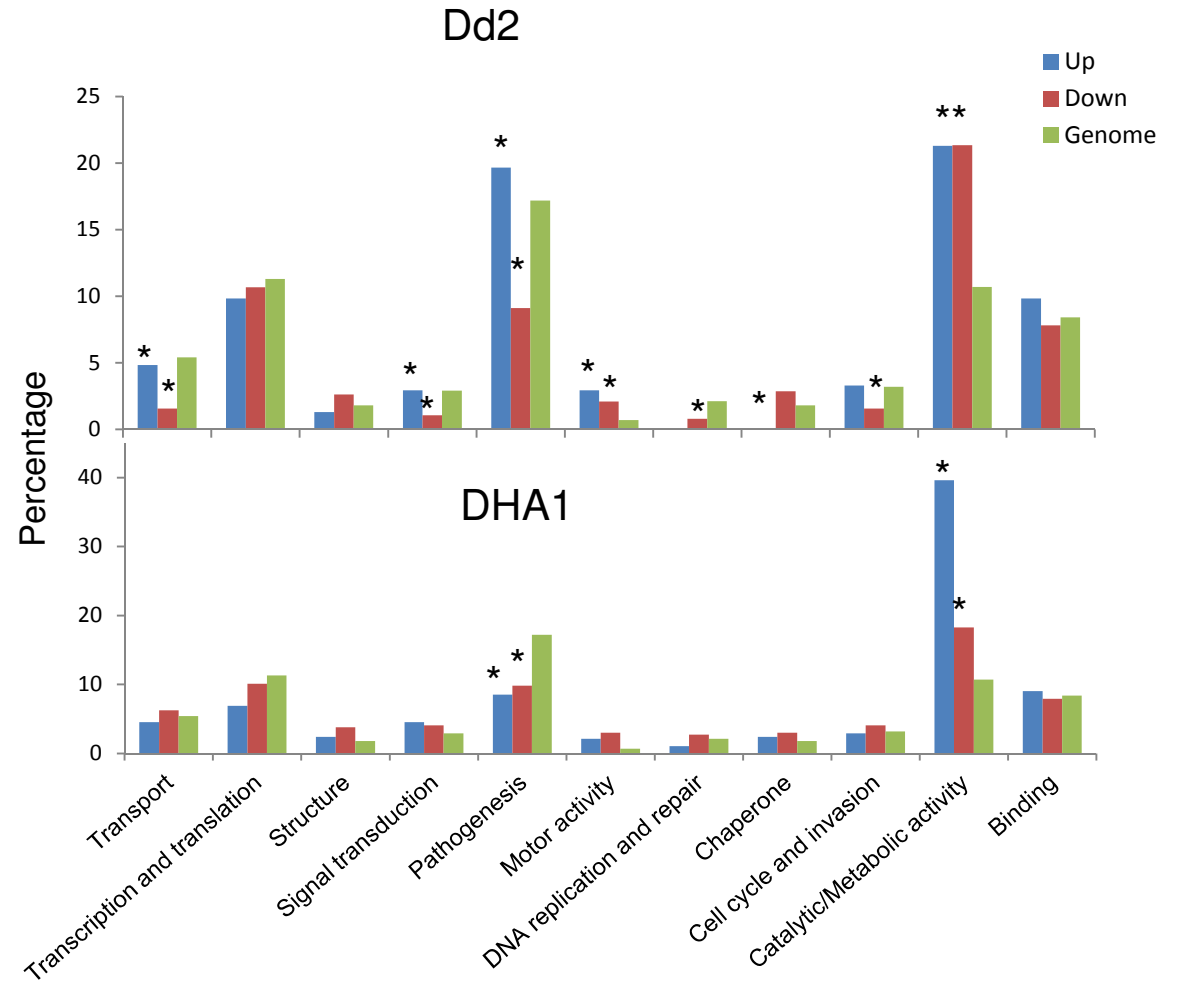

**Fig. S6. Microarray analysis to detect perturbation in genome-wide gene expression after DHA treatment. A.** Numbers of genes with  $\geq 2$ -fold changes in the expression level after DHA treatment DHA1 and Dd2 at three IDC stages. Note that significantly more genes were down-regulated than up-regulated in Dd2 parasite by DHA treatment ( $Z$ -test,  $P < 0.05$ ). **B.** Percentage of different functional categories of genes in the gene pools with  $\geq 2$ -fold up (blue) and down (red) regulation are compared to the overall genomic representations of the functional categories (green) in Dd2 (upper panel) and DHA1 (lower panel) in response to DHA treatment. Genes encoding hypothetical proteins are not shown. Asterisk (\*) denotes categories significantly enriched in up- or down-regulated gene pools as compared genomic representations ( $Z$ -test,  $P < 0.05$ ).

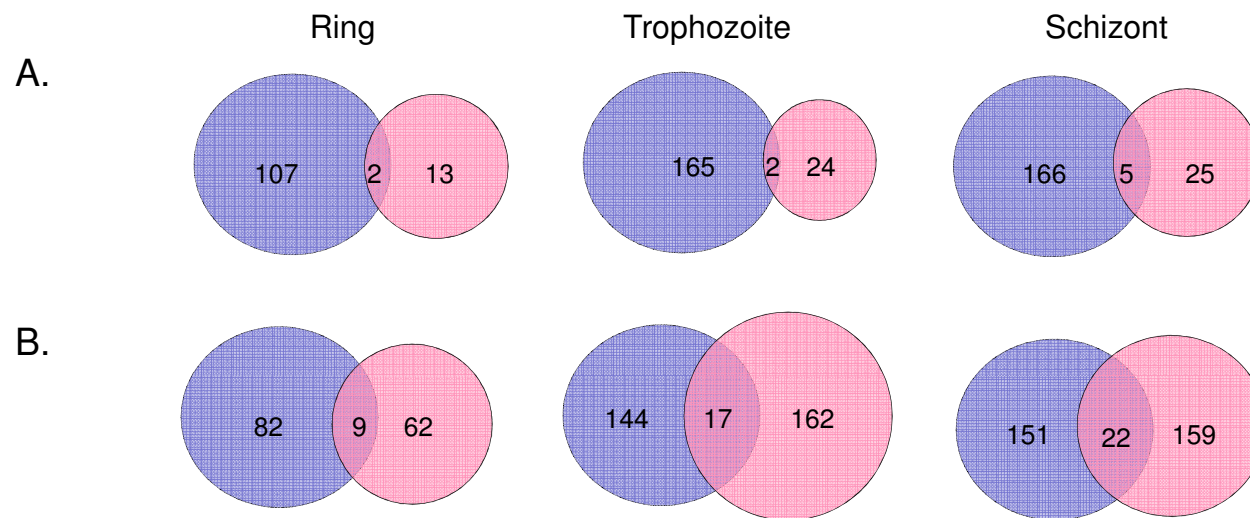

**Fig. S7. Overlapped genes in DHA1 (blue) and Dd2 (pink) that had  $\geq 2$ -fold changes after DHA treatment. A.** Up-regulated genes after DHA treatment; **B.** Down regulated genes after DHA treatment.

A.

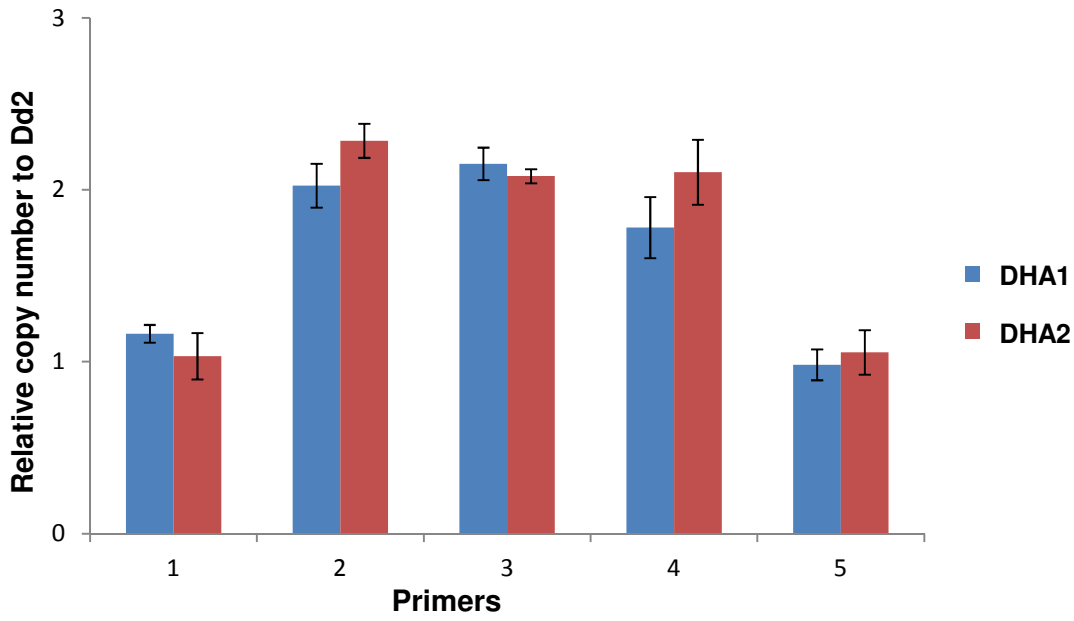

**Fig. S8. Gene copy numbers and mRNA expression levels of genes at the amplified locus on chromosome 5.**  
 A. Real-time PCR analysis of amplification region on chromosome 5. Gene copy number was compared to that in Dd2.  
 B. Relative mRNA levels (DHA1/Dd2, microarray data) of 14 genes which are in the amplified region of chromosome 5 (PFE1150w is *pfmdr1*).

Chromosome 5

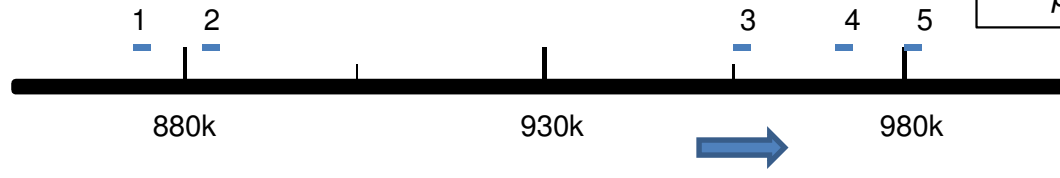

B.

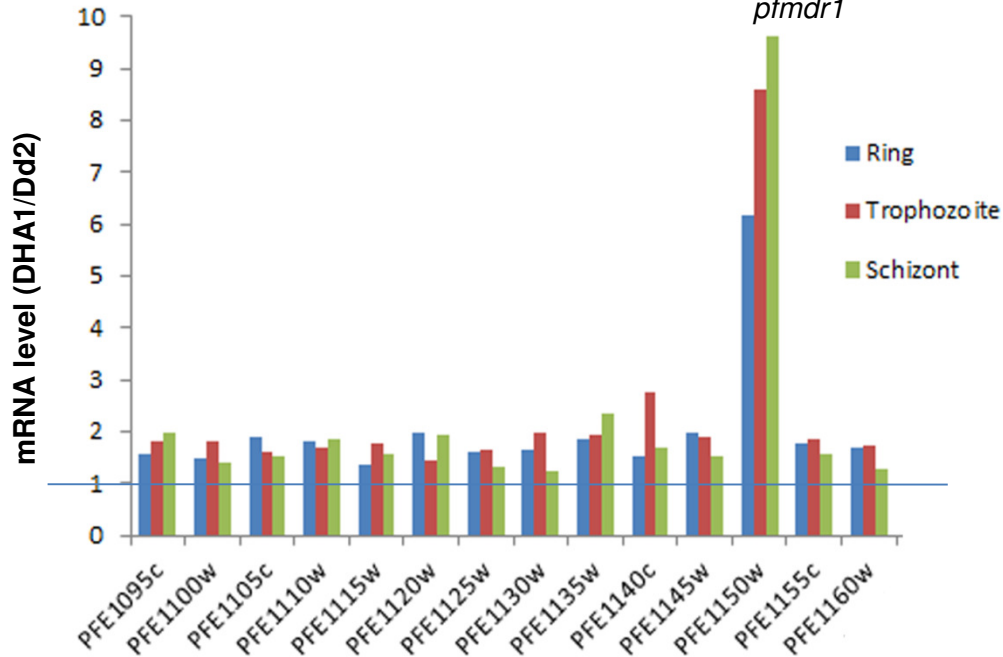



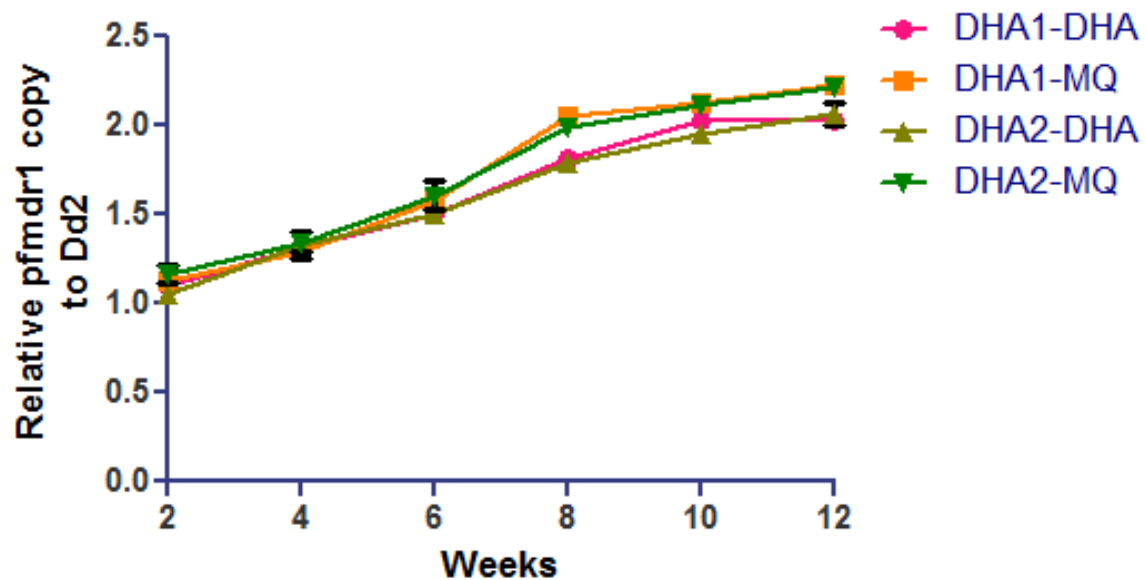

**Fig. S9. Gene copy numbers of *pfmdr1* in the revertant lines during re-selection with either dihydroartemisinin (DHA) or mefloquine (MQ).** Real-time PCR was performed at a bi-weekly interval and the *pfmdr1* copy number in Dd2 was used as the reference .

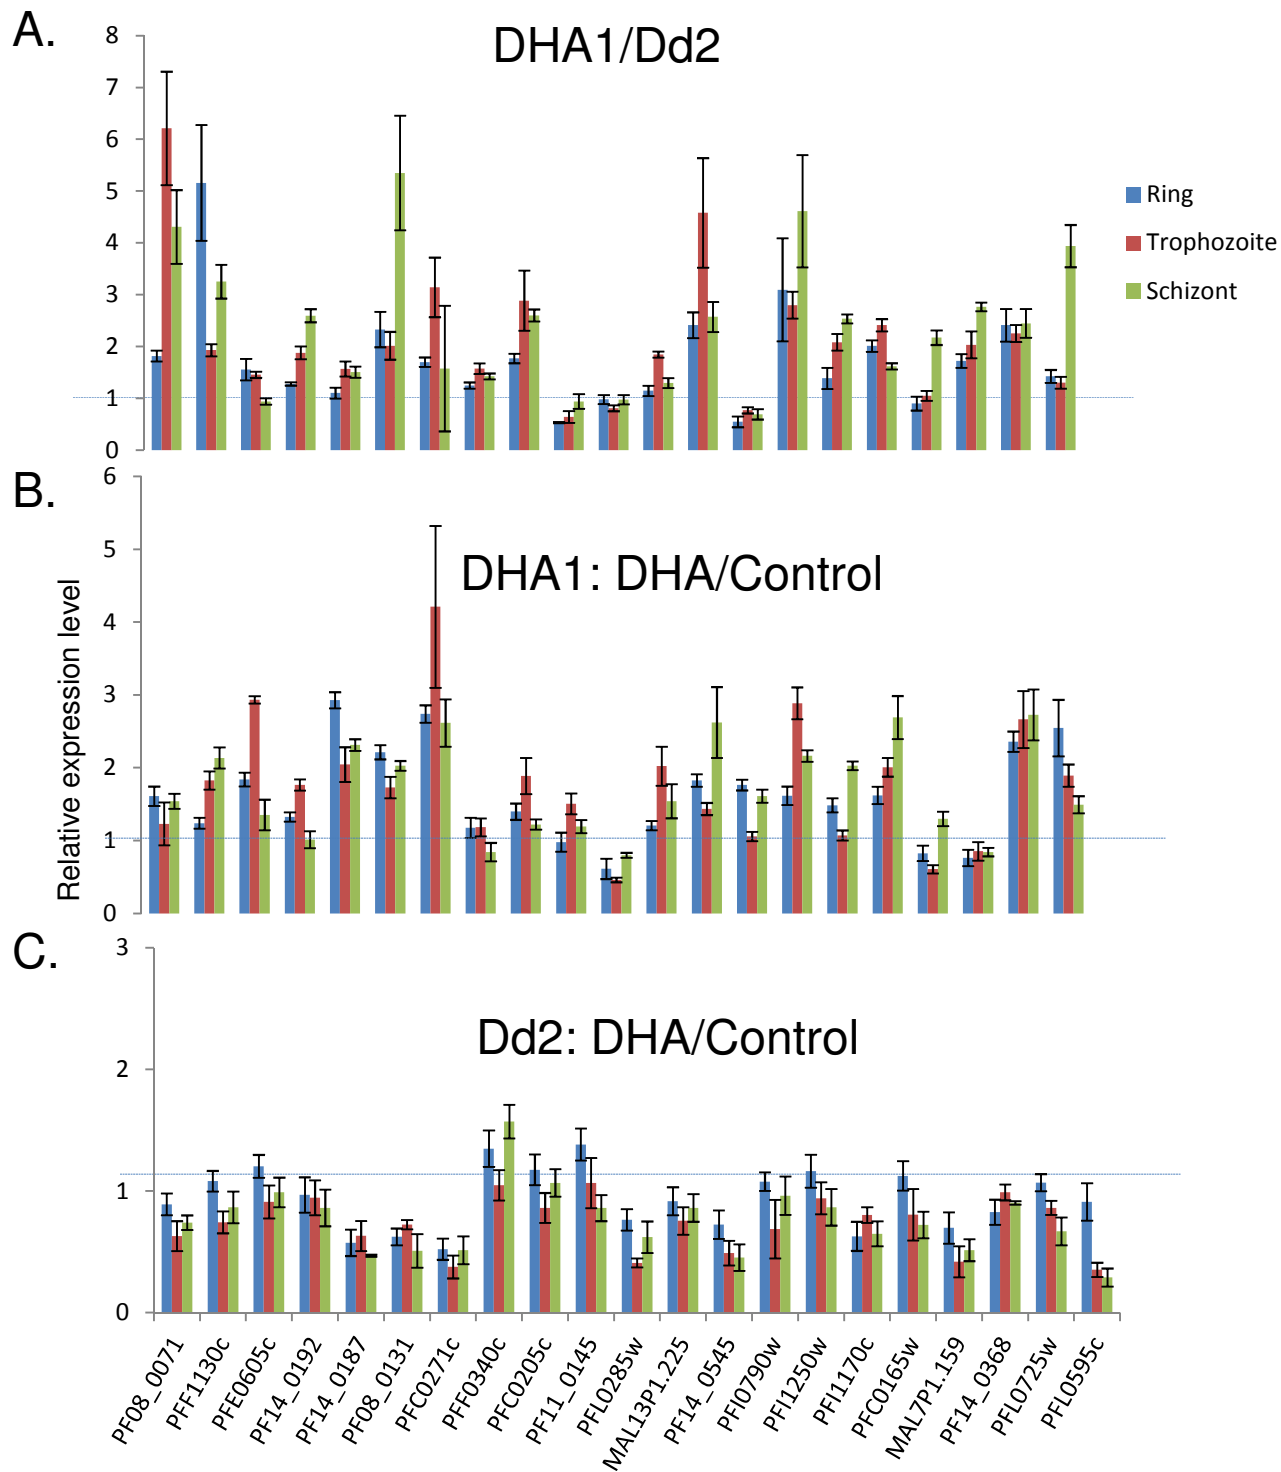

**Fig. S10. Real-time RT-PCR analysis of mRNA expression levels of antioxidant associated genes in Dd2 and DHA1 in ring (blue), trophozoite (red) and schizont (green) stages.** Relative expression of these genes were compared: **A.** between DHA1 and Dd2; **B.** Between DHA treated DHA1 and untreated (control) DHA1; and **C.** Between DHA treated Dd2 and untreated (control) Dd2. Relative expression levels in ring (14 h), trophozoite (28 h) and schizont (38 h) stages were determined by real-time RT-PCR compared to constitutively expressed *seryl-tRNA synthetase*.

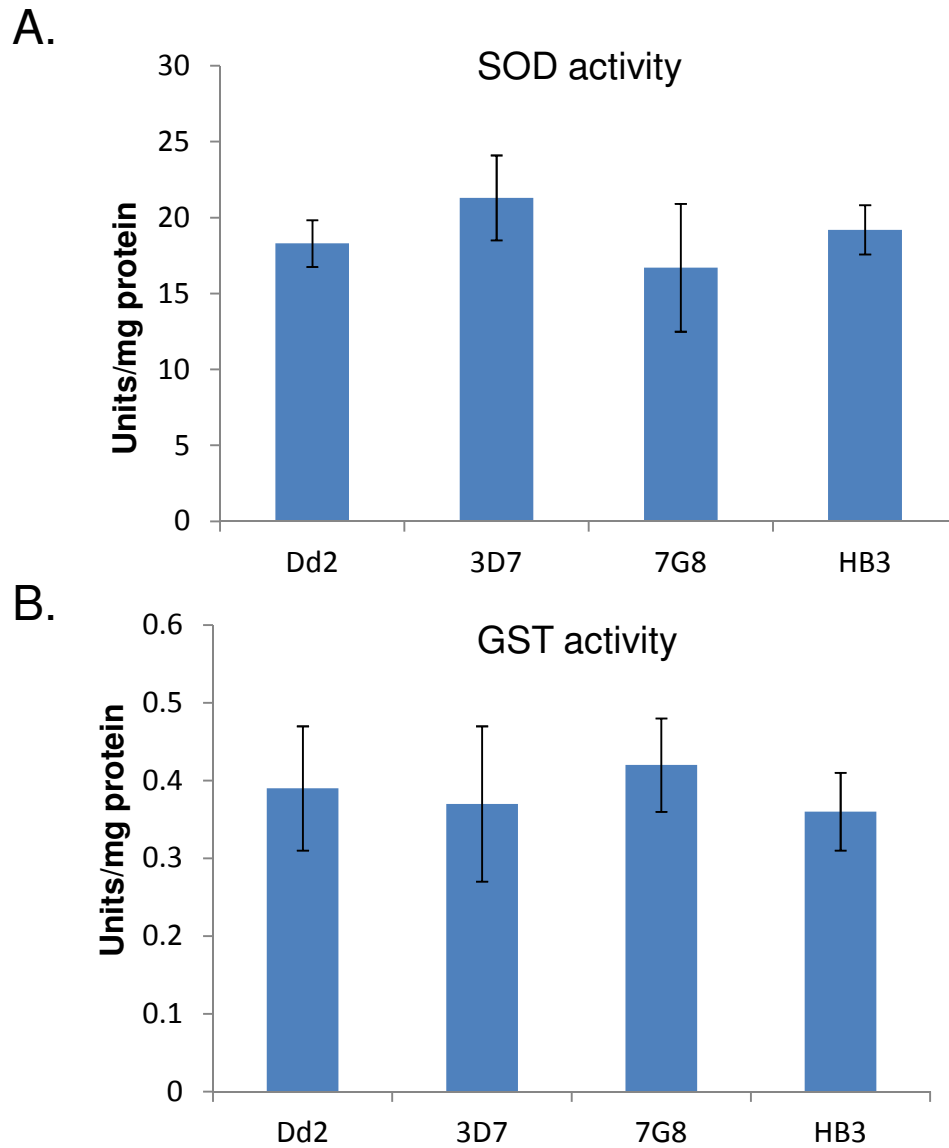

**Fig. S11. SOD and GST activities in different parasite strains.** The result represents mean  $\pm$  standard deviation from three replications. No significant differences were detected between the strains (unpaired t test,  $P > 0.013$ ). **A.** SOD activity; **B.** GST activity.

**Table S1.** Person correlation ( $R^2$ ) matrix of  $IC_{50}$ s of Dd2, two DHA-selected clones (DHA1 and DHA2), their respective revertant lines DHA1-R and DHA2-R, and re-selected lines by DHA (DHA1-R-DHA and DHA2-R-DHA) and MQ (DHA1-R-MQ and DHA2-R-MQ) between two drugs (above diagonal).  $P$  values between each comparison are shown below the diagonal.

|     | DHA    | ATM    | ATS    | ART   | CQ     | AQ     | PQ     | MQ     | LUM    | QN    | ATQ  |
|-----|--------|--------|--------|-------|--------|--------|--------|--------|--------|-------|------|
| DHA |        | 0.80   | 0.78   | 0.91  | 0.33   | 0.36   | 0.41   | 0.51   | 0.67   | 0.69  | 0.20 |
| ATM | <0.001 |        | 0.83   | 0.81  | 0.57   | 0.33   | 0.40   | 0.65   | 0.55   | 0.63  | 0.16 |
| ATS | <0.001 | <0.001 |        | 0.81  | 0.21   | 0.41   | 0.46   | 0.61   | 0.65   | 0.64  | 0.19 |
| ART | <0.001 | <0.001 | <0.001 |       | 0.42   | 0.34   | 0.46   | 0.52   | 0.61   | 0.58  | 0.24 |
| CQ  | 0.012  | 0.004  | 0.052  | 0.059 |        | 0.82   | 0.22   | 0.67   | 0.28   | 0.35  | 0.15 |
| AQ  | 0.013  | 0.014  | 0.010  | 0.015 | <0.001 |        | 0.71   | 0.77   | 0.42   | 0.47  | 0.18 |
| PQ  | 0.006  | 0.007  | 0.004  | 0.006 | 0.087  | <0.001 |        | 0.70   | 0.32   | 0.35  | 0.26 |
| MQ  | 0.005  | 0.002  | 0.003  | 0.029 | 0.002  | <0.001 | <0.001 |        | 0.49   | 0.70  | 0.31 |
| LUM | 0.002  | 0.003  | 0.002  | 0.039 | 0.023  | 0.015  | 0.057  | 0.012  |        | 0.79  | 0.25 |
| QN  | 0.002  | 0.002  | 0.002  | 0.010 | 0.030  | 0.009  | 0.061  | <0.001 | <0.001 |       | 0.19 |
| ATQ | 0.056  | 0.066  | 0.060  | 0.065 | 0.087  | 0.064  | 0.060  | 0.051  | 0.056  | 0.076 |      |

**Table S2. Up- and down-regulated genes in DHA1 as compared to Dd2**

| <b>Up-regulated gens in Art1</b>     |                                                               |                        |     |     |
|--------------------------------------|---------------------------------------------------------------|------------------------|-----|-----|
| Gene Id                              | Gene Description                                              | Fold change (Art1/Dd2) |     |     |
|                                      |                                                               | R                      | T   | S   |
| <b>Transport</b>                     |                                                               |                        |     |     |
| PFI0775w                             | glycolipid transfer protein                                   | 3.1                    |     |     |
| PF14_0034                            | translocation associated membrane protein                     |                        |     | 2.6 |
| PFL2105c                             | microtubule associated katanin                                |                        |     | 3.8 |
| PF14_0792                            | conserved Plasmodium protein, unknown function                |                        |     | 2.0 |
| MAL13P1.232                          | mog1 homolog                                                  |                        |     | 2.2 |
| PF13_0359                            | mitochondrial carrier protein                                 |                        | 2.0 | 2.1 |
| PF13_0324                            | Sec24 subunit a                                               |                        |     | 2.7 |
| MAL8P1.82                            | vacuolar sorting protein VPS9                                 |                        | 2.0 |     |
| PF13_0281                            | conserved Plasmodium protein, unknown function                |                        |     | 2.6 |
| PF10_0190                            | conserved Plasmodium protein, unknown function                |                        | 2.1 |     |
| PF08_0017                            | conserved Plasmodium protein, unknown function                |                        | 2.0 |     |
| MAL8P1.205                           | Plasmodium exported protein, unknown function                 |                        | 2.3 |     |
| MAL13P1.256                          | phosphatidylinositol transfer protein                         |                        | 2.4 | 2.0 |
| PFF1330c                             | mitochondrial import inner membrane translocase subunit       |                        |     | 2.2 |
| PF14_0328                            | mitochondrial import inner membrane translocase subunit tim17 |                        |     | 3.1 |
| PFA0590w                             | ABC transporter, (CT family)                                  | 2.3                    |     |     |
| PFE1150w                             | multidrug resistance protein 1 (mdr1)                         | 6.2                    | 8.6 | 9.8 |
| PF10_0216                            | zinc transporter                                              |                        |     | 2.5 |
| PFB0465c                             | monocarboxylate transporter                                   |                        |     | 3.3 |
| PF14_0662                            | nucleoside transporter                                        |                        |     | 2.3 |
| PF11_0059                            | metabolite/drug transporter                                   |                        |     | 2.0 |
| PF07_0064                            | drug/metabolite exporter, drug/metabolite transporter         |                        |     | 2.3 |
| <b>Translation and transcription</b> |                                                               |                        |     |     |
| PF14_0665                            | conserved Plasmodium protein, unknown function                | 5.7                    |     |     |
| PF13_0235                            | transcription factor with AP2 domain(s)                       | 3.5                    | 4.2 | 2.8 |
| PF13_0310                            | small subunit rRNA processing factor                          |                        | 2.5 |     |
| PF14_0059                            | conserved Plasmodium protein, unknown function                |                        | 2.9 |     |
| PF14_0079                            | transcription factor with AP2 domain(s)                       |                        | 3.3 |     |
| PFF0345w                             | translation initiation factor IF-2                            |                        | 2.4 |     |
| PF07_0126                            | transcription factor with AP2 domain(s)                       |                        | 4.5 |     |
| PF10_0078                            | histone deacetylase                                           |                        | 2.0 |     |
| PF13_0097                            | transcription factor with AP2 domain(s)                       |                        | 2.9 |     |
| PFL1645w                             | conserved Plasmodium protein, unknown function                |                        | 2.8 |     |
| PF11_0077                            | DEAD/DEAH box helicase                                        |                        | 2.2 | 3.0 |
| PFA0180w                             | ATP-dependent RNA helicase                                    |                        | 2.3 | 2.4 |
| PFF1225c                             | DNA polymerase 1                                              |                        | 2.9 | 2.1 |
| PF08_0012                            | SET domain protein                                            |                        | 3.4 | 2.4 |
| PFF0505c                             | conserved Plasmodium protein, unknown function                |                        | 2.1 | 2.0 |
| MAL13P1.14                           | DEAD/DEAH box ATP-dependent RNA helicase                      |                        | 2.4 | 2.0 |
| MAL13P1.63                           | eukaryotic translation initiation factor 4 gamma              |                        | 2.0 | 3.1 |
| PFF1440w                             | SET domain protein                                            |                        | 3.2 | 3.5 |

|             |                                                         |     |     |     |
|-------------|---------------------------------------------------------|-----|-----|-----|
| PFA0510w    | bromodomain protein                                     |     | 2.9 | 2.7 |
| PFL0830w    | snoRNA-associated small subunit rRNA processing protein |     | 4.3 | 2.2 |
| PF11_0293   | multiprotein bridging factor type 1                     |     |     | 3.4 |
| PFC0410w    | YT521-B-like family protein                             |     |     | 2.0 |
| PF10_0336   | conserved Plasmodium protein, unknown function          | 9.2 | 6.4 | 5.0 |
| PF14_0185   | ATP-dependent RNA helicase                              |     | 2.6 |     |
| PF14_0370   | DEAD/DEAH box helicase                                  |     | 2.8 |     |
| MAL8P1.64   | conserved Plasmodium protein, unknown function          |     | 3.1 |     |
| MAL8P1.83   | eukaryotic translation initiation factor                |     |     | 3.0 |
| MAL7P1.20   | peptide chain release factor                            |     |     | 2.4 |
| MAL13P1.213 | transcription activator                                 |     |     | 3.5 |
| PF14_0514   | tRNA intron endonuclease                                |     |     | 2.5 |
| PF08_0037   | RNA polymerase II mediator complex protein MED7         |     |     | 2.0 |
| PFL2230c    | conserved Plasmodium protein, unknown function          |     |     | 2.7 |
| MAL8P1.131  | gas41 homologue                                         |     |     | 2.5 |
| PFB0245c    | DNA-directed RNA polymerase II 16 kDa subunit           |     |     | 3.7 |
| PF14_0398   | transcription factor TFIIH complex subunit Tfb5         |     |     | 2.2 |
| PF13_0341   | DNA-directed RNA polymerase 2                           |     |     | 2.4 |
| PFI0475w    | small nuclear ribonucleoprotein (snRNP)                 |     |     | 2.5 |
| PF10_0179a  | PHF5-like protein                                       |     |     | 2.0 |
| PF11_0437   | 60S ribosomal protein L28                               |     | 3.1 | 2.2 |
| PFL1150c    | mitochondrial ribosomal protein L24-2 precursor         |     |     | 2.5 |
| PF11_0272   | 40S ribosomal protein S18                               |     |     | 2.2 |
| PFI1585c    | mitochondrial ribosomal protein S6 precursor            |     |     | 2.7 |
| PF11_0274   | large ribosomal subunit processing factor               |     |     | 3.0 |
| PF14_0709   | mitochondrial ribosomal protein L20 precursor           |     |     | 2.5 |
| PF11_0255   | ribonucleoprotein                                       |     |     | 2.6 |
| PF14_0584   | mitochondrial ribosomal protein S4/S9 precursor         |     |     | 2.8 |
| PFL0400w    | apicoplast ribosomal protein L29 precursor              |     |     | 2.0 |
| PF14_0635   | large ribosomal subunit assembling protein              |     |     | 3.4 |
| PFC0295c    | 40S ribosomal protein S12                               |     |     | 2.2 |
| PF11_0337   | mitochondrial ribosomal protein L2 precursor            |     |     | 2.4 |
| PF14_0451   | mitochondrial ribosomal protein S14 precursor           |     |     | 2.3 |
| PF13_0224   | 60S ribosomal protein L18                               |     |     | 2.5 |
| MAL13P1.327 | mitochondrial ribosomal protein S17 precursor           |     |     | 2.3 |
| PF11_0058-a | RNA polymerase subunit                                  |     |     | 3.8 |

---

#### Structure

---

|             |                                                         |  |     |     |
|-------------|---------------------------------------------------------|--|-----|-----|
| MAL13P1.128 | conserved Plasmodium protein, unknown function          |  | 2.7 |     |
| PFE1135w    | iron-sulfur assembly protein                            |  |     | 2.4 |
| PFD1050w    | alpha tubulin 2                                         |  |     | 3.8 |
| PFE1140c    | G10 protein                                             |  |     | 2.6 |
| PFI1510w    | nucleolar protein Nop52                                 |  | 3.7 |     |
| PFD0225w    | conserved Plasmodium membrane protein, unknown function |  | 5.2 |     |
| PFL0925w    | formin 2                                                |  | 2.9 | 3.2 |
| PF11_0234   | conserved Plasmodium protein, unknown function          |  | 2.1 | 2.0 |
| PF08_0134   | conserved Plasmodium protein, unknown function          |  |     | 2.3 |

---

#### Signal transduction

---

|                     |                                                             |      |      |      |
|---------------------|-------------------------------------------------------------|------|------|------|
| PFE0890c            | conserved Plasmodium protein, unknown function              |      |      | 2.0  |
| PFL0080c            | NIMA related kinase 3                                       | 2.9  |      |      |
| PF14_0734           | serine/threonine protein kinase, FIKK family                |      |      | 2.4  |
| PF14_0733           | serine/threonine protein kinase, FIKK family                |      |      | 2.7  |
| MAL13P1.84          | protein kinase                                              |      |      | 2.0  |
| MAL13P1.279         | protein kinase 5                                            |      |      | 3.0  |
| PFI0210c            | conserved protein, unknown function                         |      |      | 2.9  |
| PFE1270c            | WD domain, G-beta repeat-containing protein                 |      | 2.7  |      |
| PF11_0127           | conserved Plasmodium protein, unknown function              |      | 3.5  |      |
| MAL13P1.190         | conserved Plasmodium protein, unknown function              |      | 2.7  |      |
| PFD0965w            | phosphatidylinositol 4-kinase                               |      | 2.5  |      |
| PF13_0210           | conserved Plasmodium protein, unknown function              |      | 2.2  |      |
| PFA0380w            | serine/threonine protein kinase                             |      | 2.2  | 3.4  |
| PF13_0221           | conserved Plasmodium protein, unknown function              |      | 7.2  | 2.1  |
| <b>Pathogenesis</b> |                                                             |      |      |      |
| PFD1205w            | Plasmodium exported protein (hyp15), unknown function       | 5.7  |      |      |
| P1.161              | Plasmodium exported protein (hyp7), unknown function        | 2.5  |      |      |
| PFI1770w            | Plasmodium exported protein (PHISTb), unknown function      | 2.0  |      |      |
| MAL13P1.2           | rifin                                                       | 11.2 |      |      |
| PFD1240w            | rifin                                                       | 3.2  |      |      |
| PF14_0763           | Plasmodium exported protein (PHISTa), unknown function      | 2.1  |      |      |
| MAL13P1.60          | erythrocyte Binding antigen-140                             | 2.0  |      |      |
| PFL2590w            | Plasmodium exported protein (PHISTa), unknown function      | 9.6  |      |      |
| PF14_0748           | Plasmodium exported protein (PHISTa), unknown function      | 2.7  |      |      |
| MAL8P1.6            | early transcribed membrane protein 8                        | 2.8  |      |      |
| PFA0020w            | rifin                                                       | 9.2  |      |      |
| PF10_0026           | tryptophan-rich antigen 3                                   |      | 2.2  |      |
| PFI0030c            | rifin                                                       | 2.0  |      |      |
| PFD1007w            | conserved Plasmodium protein, unknown function              | 2.3  |      |      |
| PF14_0732           | Plasmodium exported protein (PHISTb), unknown function      | 12.7 |      |      |
| PF10_0006           | rifin                                                       | 7.1  |      |      |
| PFD0100c            | surface-associated interspersed gene 4.1, (SURFIN4.1)       | 8.4  |      |      |
| PFL1955w            | erythrocyte membrane protein 1, PfEMP1                      | 12.4 |      |      |
| PFD1006w            | conserved Plasmodium protein, unknown function              | 2.0  |      |      |
| PFD0070c-a          | rifin                                                       | 3.4  |      | 8.5  |
| MAL7P1.225-a        | Plasmodium exported protein (PHISTa-like), unknown function | 5.1  | 7.9  |      |
| PFI1785w            | Plasmodium exported protein (PHISTb), unknown function      | 2.0  | 6.7  |      |
| PFC1080c            | Pfmc-2TM Maurer's cleft two transmembrane protein           | 7.9  | 5.4  |      |
| PFA0065w            | Pfmc-2TM Maurer's cleft two transmembrane protein           | 2.0  | 5.9  |      |
| PFA0680c            | Pfmc-2TM Maurer's cleft two transmembrane protein           | 8.9  | 3.6  |      |
| MAL7P1.58           | Pfmc-2TM Maurer's cleft two transmembrane protein           | 8.9  | 62.0 | 13.0 |
| PFI1780w            | Plasmodium exported protein (PHISTc), unknown function      | 66.0 | 21.4 | 5.1  |
| PFB0100c            | Knob-associated histidine-rich protein                      | 8.7  | 3.1  | 2.2  |
| PFI1805w            | rifin                                                       | 15.7 | 3.7  | 2.0  |
| PFI0450c            | apoptosis-related protein                                   |      |      | 2.5  |
| PF07_0132           | rifin                                                       | 5.2  |      | 5.2  |
| PF10_0013           | Plasmodium exported protein (hyp12), unknown function       |      |      | 2.0  |

|                                      |                                                              |     |      |     |
|--------------------------------------|--------------------------------------------------------------|-----|------|-----|
| PFF1520w                             | RESA-like protein                                            |     | 2.1  |     |
| PF11_0024                            | Plasmodium exported protein (hyp4), unknown function         |     | 2.8  |     |
| PF08_0137                            | Plasmodium exported protein (PHISTc), unknown function       |     | 7.4  |     |
| PF10_0115                            | QF122 antigen                                                |     | 2.0  |     |
| MAL8P1.209                           | var-like protein                                             |     | 2.1  |     |
| PF11_0111                            | asparagine-rich antigen                                      |     | 2.3  |     |
| PFD1205w                             | Plasmodium exported protein (hyp15), unknown function        |     | 6.2  |     |
| PFB1035w                             | rifin                                                        |     | 7.3  |     |
| MAL7P1.227                           | stevor                                                       |     | 8.2  |     |
| PF08_0102                            | asparagine-rich antigen Pfa55-14                             |     | 2.9  |     |
| PFB0020c                             | erythrocyte membrane protein 1 (PfEMP1), exon2               |     | 9.7  |     |
| PFB0985c                             | Pfmc-2TM Maurer's cleft two transmembrane protein            |     | 7.0  |     |
| PF14_0758                            | Plasmodium exported protein (hyp17), unknown function        |     | 10.2 |     |
| PF11_0037                            | Plasmodium exported protein (PHISTb), unknown function       |     | 2.3  |     |
| PF10_0161                            | Plasmodium exported protein (PHISTc), unknown function       |     | 6.7  |     |
| PFI1770w                             | Plasmodium exported protein (PHISTb), unknown function       |     | 2.0  | 8.1 |
| PFI1750c                             | Plasmodium exported protein (hyp11), unknown function        |     | 2.3  | 3.4 |
| PFB0095c                             | erythrocyte membrane protein 3                               |     | 2.1  | 7.4 |
| PFC0045w                             | rifin                                                        |     | 6.7  | 3.0 |
| PF11_0506                            | antigen 332, DBL-like protein                                |     | 3.5  | 2.7 |
| PF10_0213                            | conserved Plasmodium protein (10b antigen), unknown function |     | 2.0  | 2.0 |
| PFD1045c                             | erythrocyte membrane-associated antigen                      |     | 2.4  |     |
| <b>Motor activity</b>                |                                                              |     |      |     |
| PF07_0042                            | conserved Plasmodium protein, unknown function               | 3.0 | 2.1  |     |
| PFL0660w                             | dynein light chain 1                                         |     |      | 2.1 |
| PF07_0016                            | conserved Plasmodium membrane protein, unknown function      |     | 2.3  |     |
| PF13_0277                            | conserved Plasmodium protein, unknown function               |     | 2.0  |     |
| PFC0960c                             | microtubule and actin Binding protein                        |     | 2.3  |     |
| PF11_0277                            | conserved Plasmodium protein, unknown function               |     | 2.3  |     |
| PFD0320c                             | conserved Plasmodium protein, unknown function               |     | 2.7  |     |
| PFE0230w                             | conserved Plasmodium protein, unknown function               |     | 2.5  |     |
| PFC0860w                             | kinesin                                                      |     | 2.8  |     |
| PF11_0047                            | actin-like protein                                           |     |      | 2.2 |
| <b>DNA replication and repairing</b> |                                                              |     |      |     |
| PFB0755w                             | conserved Plasmodium protein, unknown function               |     | 3.4  | 2.3 |
| PF10_0040                            | conserved Plasmodium protein, unknown function               |     | 2.0  |     |
| PFB0160w                             | ERCC1 nucleotide excision repair protein                     |     |      | 2.8 |
| PFA0545c                             | replication factor c protein                                 |     | 3.5  |     |
| PFL2440w                             | DNA repair protein rhp16                                     |     | 2.9  |     |
| PF10_0099                            | DNA2/NAM7 helicase. putative                                 |     | 3.0  |     |
| <b>Chaperone</b>                     |                                                              |     |      |     |
| PF08_0006                            | prohibitin                                                   |     |      | 3.3 |
| PF10_0144                            | prohibitin                                                   |     |      | 2.6 |
| MAL13P1.341                          | ribosome biogenesis protein MRT4                             |     |      | 2.7 |
| PF10_0276                            | zinc finger, C3HC4 type                                      | 2.0 |      |     |
| PFL0740c                             | 10 kd chaperonin                                             |     |      | 2.2 |
| PF11_0351                            | heat shock protein 70                                        |     |      | 2.5 |



|                                     |                                                         |     |     |     |
|-------------------------------------|---------------------------------------------------------|-----|-----|-----|
| PF10_0273                           | DHHC-type zinc finger protein                           |     |     | 2.3 |
| PF14_0167                           | prefoldin subunit 2                                     |     |     | 2.2 |
| PFB0595w                            | heat shock protein 40                                   |     |     | 2.0 |
| PF07_0031                           | heat shock protein 86 family protein                    |     |     | 2.8 |
| PFI0335w                            | tubulin-specific Chaperone                              |     |     | 2.8 |
| PF11_0026                           | hypothetical protein                                    | 2.1 |     |     |
| PF11_0088                           | prefoldin                                               |     |     | 2.5 |
| PF10_0370                           | enhancer of rudimentary homolog                         |     |     | 2.3 |
| PF08_0054                           | heat shock protein 70                                   | 2.1 | 2.1 | 2.1 |
| PF11_0170                           | cyclophilin                                             |     |     | 2.9 |
| PFI0875w                            | heat shock protein 70                                   |     | 2.4 |     |
| PFD0970c                            | zinc finger protein                                     |     | 2.1 |     |
| PF07_0029                           | heat shock protein 90                                   |     | 2.9 | 2.5 |
| PFE0055c                            | heat shock protein 40, type II                          |     | 2.0 | 3.2 |
| PF11_0357                           | zinc finger protein                                     |     | 3.3 | 3.1 |
| <b>Cell cycle and invasion</b>      |                                                         |     |     |     |
| PFE1540w                            | CPW-WPC family protein                                  |     |     | 2.3 |
| PF13_0022                           | cyclin                                                  |     |     | 2.5 |
| PFC0165w                            | spindle pole body protein                               |     |     | 2.4 |
| PFL0800c                            | cell traversal protein for ookinetes and sporozoites    | 2.6 |     |     |
| <b>Catalytic/Metabolic activity</b> |                                                         |     |     |     |
| PF14_0415                           | dephospho-CoA kinase                                    | 3.4 |     |     |
| PF11_0411                           | carbonic anhydrase                                      | 2.1 |     |     |
| PFL1260w                            | hydrolase/phosphatase                                   | 2.2 |     |     |
| MAL8P1.22                           | dehydrodolichyl diphosphate synthetase                  | 2.9 |     |     |
| PFI1250w                            | thioredoxin-like protein 2                              | 2.8 | 3.4 | 4.7 |
| PFI0925w                            | gamma-glutamylcysteine synthetase                       | 2.0 |     | 2.2 |
| PFF1130c                            | superoxide dismutase                                    | 4.8 | 2.5 | 2.6 |
| PF14_0164                           | NADP-specific glutamate dehydrogenase                   | 3.1 | 3.0 | 2.4 |
| PFL0725w                            | thioredoxin peroxidase 2                                | 2.5 | 2.0 | 2.2 |
| PFB0423c                            | conserved protein, unknown function                     |     |     | 2.1 |
| PFL0595c                            | glutathione peroxidase                                  |     |     | 5.7 |
| PFI1050c                            | Fe-S-cluster redox enzyme                               |     |     | 2.0 |
| PF13_0317                           | conserved Plasmodium protein, unknown function          |     |     | 3.1 |
| PF11_0169                           | SNO glutamine amidotransferase family protein           |     |     | 2.2 |
| PF14_0590                           | thioredoxin-like protein                                |     |     | 2.1 |
| PFF1490w                            | conserved Plasmodium protein, unknown function          |     |     | 2.4 |
| MAL7P1.31                           | conserved Plasmodium membrane protein, unknown function |     |     | 2.0 |
| PFL0720w                            | conserved Plasmodium membrane protein, unknown function |     |     | 2.4 |
| PFC0495w                            | plasmepsin VI                                           |     |     | 2.7 |
| PFL0230w                            | cytidine/deoxycytidylate deaminase                      |     |     | 2.3 |
| MAL7P1.26                           | O-sialoglycoprotein endopeptidase                       |     |     | 2.2 |
| PFL0365c                            | conserved Plasmodium protein, unknown function          |     |     | 2.0 |
| PF13_0122                           | RRM containing cyclophilin                              |     |     | 2.0 |
| PF13_0144                           | oxidoreductase                                          |     |     | 3.0 |
| PFE0730c                            | ribose 5-phosphate epimerase                            |     |     | 2.1 |
| MAL13P1.284                         | pyrroline carboxylate reductase                         |     |     | 2.0 |

|            |                                                               |     |     |
|------------|---------------------------------------------------------------|-----|-----|
| PFF1335c   | 4-methyl-5(B-hydroxyethyl)-thiazol monophosphate biosynthesis |     | 2.4 |
| PF10_0379  | phospholipase                                                 |     | 3.2 |
| PF10_0155  | enolase                                                       |     | 1.7 |
| MAL7P1.159 | 1-cys peroxiredoxin                                           |     | 3.1 |
| PFC0595c   | serine/threonine protein phosphatase                          |     | 2.2 |
| PF10_0225  | orotidine monophosphate decarboxylase                         |     | 2.9 |
| MAL13P1.55 | cytochrome c2 precursor                                       |     | 2.7 |
| PF14_0022  | conserved Plasmodium protein, unknown function                |     | 2.1 |
| PFL0705c   | adrenodoxin-type ferredoxin                                   |     | 2.5 |
| PF14_0484  | acetyl-CoA acetyltransferase                                  |     | 2.6 |
| PF14_0192  | glutathione reductase                                         |     | 2.7 |
| PFL2510w   | chitinase                                                     |     | 2.4 |
| PF10_0210  | deoxyribose-phosphate aldolase                                |     | 2.0 |
| PFA0355w   | carbon catabolite repressor protein 4                         |     | 2.1 |
| PF11420w   | guanylate kinase                                              |     | 2.4 |
| PFA0530c   | adenylate kinase                                              |     | 3.1 |
| PF14_0187  | glutathione S-transferase                                     |     | 2.1 |
| MAL7P1.19  | ubiquitin transferase                                         | 2.1 |     |
| PF14_0088  | aldo-keto reductase                                           | 2.0 |     |
| PF14_0206  | conserved Plasmodium protein, unknown function                | 2.0 |     |
| PFL1650w   | conserved Plasmodium protein, unknown function                | 2.2 |     |
| PFB0870w   | conserved Plasmodium protein, unknown function                | 2.6 |     |
| PFB0510w   | GAF domain-related protein                                    | 3.2 |     |
| PFC0271c   | glutaredoxin 1                                                | 2.4 | 2.6 |
| PFL1130c   | conserved Plasmodium protein, unknown function                |     | 2.5 |
| PFD0207c   | conserved Plasmodium protein, unknown function                |     | 2.3 |
| PF14_0647  | conserved Plasmodium protein, unknown function                |     | 2.1 |
| PF14_0741  | hypothetical protein                                          |     | 2.2 |
| PFF0745c   | ribonuclease                                                  |     | 2.4 |
| PF11_0436  | coproporphyrinogen III oxidase                                |     | 2.1 |
| MAL8P1.154 | conserved Plasmodium protein, unknown function                |     | 2.6 |
| PF11_0251  | endoplasmic reticulum oxidoreductin                           |     | 2.7 |
| PF14_0286  | glutamate dehydrogenase                                       |     | 2.0 |
| PF08_0131  | 1-cys peroxiredoxin                                           |     | 2.3 |
| PF14_0368  | thioredoxin peroxidase 1                                      |     | 2.6 |
| PF11170c   | thioredoxin reductase                                         |     | 2.7 |
| PF14_0545  | thioredoxin                                                   |     | 4.6 |
| PF07_0085  | ferredoxin reductase-like protein                             |     | 3.0 |
| PF07_0059  | 4-nitrophenylphosphatase                                      |     | 2.4 |
| PFA0455c   | fatty acid elongation protein, GNS1/SUR4 family               |     | 2.7 |
| PFF0770c   | conserved Plasmodium protein, unknown function                |     | 2.9 |
| MAL8P1.8   | prolyl 4-hydroxylase alpha subunit 1                          |     | 2.4 |
| PF10_0211  | conserved Plasmodium membrane protein, unknown function       |     | 2.0 |
| PF14_0143  | atypical protein kinase, ABC-1 family                         |     | 2.2 |
| PF13_0272  | thioredoxin-related protein                                   |     | 2.0 |
| PFC0205c   | 1-cys-glutaredoxin-like protein-1                             |     | 2.6 |
| PF14_0174  | pseudouridine synthase                                        |     | 2.3 |

|            |                                                         |     |     |     |
|------------|---------------------------------------------------------|-----|-----|-----|
| PF14_0326  | dynein-related AAA-type ATPase                          |     | 2.5 | 3.0 |
| PFB0280w   | conserved Plasmodium protein, unknown function          |     | 2.2 | 2.0 |
| PFB0279w   | conserved Plasmodium protein, unknown function          |     | 2.0 | 2.7 |
| PF14_0145  | ubiquitin carboxyl-terminal hydrolase                   |     | 2.1 | 2.1 |
| PFE0155w   | conserved Plasmodium protein, unknown function          |     | 2.2 | 2.0 |
| PF13_0273  | P-loop containing nucleoside triphosphate hydrolase     |     | 2.8 | 2.1 |
| PF14_0123  | conserved Plasmodium protein, unknown function          |     | 3.0 | 2.1 |
| PF14_0342  | conserved Plasmodium membrane protein, unknown function |     | 2.4 | 2.0 |
| PFE1430c   | cyclophilin                                             | 2.7 |     | 2.7 |
| PF11_0457  | ubiquitin activating enzyme (E1) subunit Aos1           | 2.2 |     | 2.2 |
| PFD0355c   | peptidyl-tRNA hydrolase PTH2                            |     |     | 2.1 |
| PFE0630c   | orotate phosphoribosyltransferase                       |     |     | 2.0 |
| PFF0515c   | conserved protein, unknown function                     |     |     | 3.2 |
| PF14_0363  | metacaspase-like protein                                |     | 2.1 |     |
| PF10_0069  | PPPDE peptidase                                         |     | 2.4 | 2.5 |
| PF08_0071  | Fe-superoxide dismutase                                 | 2.1 | 4.1 | 4.2 |
| PF11_0307  | phosphatidylinositol-4-phosphate-5-kinase               |     | 2.2 | 2.6 |
| PFE0570w   | RNA pseudouridylate synthase                            |     | 2.7 |     |
| PF13_0083  | lipoate protein ligase a type 1                         |     |     | 2.2 |
| PF10_0212a | conserved Plasmodium protein, unknown function          |     | 2.1 |     |
| PF14_0736  | Plasmodium exported protein, unknown function           |     | 2.0 | 2.4 |
| MAL8P1.76  | meiotic recombination protein dmc1-like protein         |     |     | 2.5 |
| PF13_0148  | conserved Plasmodium protein, unknown function          |     | 2.2 |     |
| PFL2175w   | ubiquitin conjugating enzyme E2                         |     |     | 2.9 |
| PF11030c-a | ubiquitin conjugating enzyme                            |     |     | 2.0 |
| PF14_0036  | phosphatase                                             |     |     | 2.6 |

#### Binding

|             |                                                         |     |     |     |
|-------------|---------------------------------------------------------|-----|-----|-----|
| MAL13P1.106 | probable protein, unknown function                      | 2.7 |     | 2.7 |
| PFF0400w    | conserved Plasmodium protein, unknown function          | 2.6 | 2.6 |     |
| PF11_0086   | MIF4G domain containing protein                         |     | 2.2 | 2.0 |
| PFD0150w    | conserved Plasmodium protein, unknown function          | 4.1 | 2.0 | 2.4 |
| PFF0683c    | conserved Plasmodium protein, unknown function          |     | 2.4 |     |
| PFB0225c    | conserved Plasmodium protein, unknown function          |     | 2.1 |     |
| PF13_0254   | conserved Plasmodium membrane protein, unknown function |     | 2.0 |     |
| PFD0150w    | conserved Plasmodium protein, unknown function          |     | 2.0 | 2.4 |
| PFB0775w    | conserved Plasmodium protein, unknown function          |     | 2.7 |     |
| PFF1180w    | anaphase promoting complex subunit                      | 2.1 |     |     |
| MAL13P1.294 | GTP Binding protein                                     |     |     | 2.9 |
| PF13_0010   | glycophorin Binding protein                             | 2.0 |     |     |
| MAL13P1.176 | reticulocyte Binding protein 2 homologue b              | 2.1 |     |     |
| PF11520w    | asparagine-rich antigen                                 | 2.3 |     |     |
| PF14_0749   | acyl-CoA Binding protein                                | 2.6 |     |     |
| PFD0700c    | RNA Binding protein                                     |     |     | 2.1 |
| PF11610c    | calcyclin Binding protein                               |     |     | 2.4 |
| MAL8P1.50   | conserved Plasmodium protein, unknown function          |     |     | 2.7 |
| PF14_0057   | RNA Binding protein                                     |     |     | 2.2 |
| PF14_0056   | RNA Binding protein                                     |     | 2.1 |     |

|                         |                                                         |     |     |     |
|-------------------------|---------------------------------------------------------|-----|-----|-----|
| PFB0195c                | conserved Plasmodium protein, unknown function          |     | 2.0 |     |
| PF14_0509               | RAP protein                                             |     | 2.2 |     |
| PFC0425w                | conserved Plasmodium protein, unknown function          |     | 2.1 |     |
| PF14_0315               | conserved Plasmodium membrane protein, unknown function |     | 2.5 |     |
| PF11_0418               | conserved Plasmodium protein, unknown function          |     | 2.4 |     |
| PFB0115w                | conserved Plasmodium protein, unknown function          |     | 2.2 | 2.1 |
| PF11_0326               | conserved Plasmodium protein, unknown function          |     | 2.5 | 2.0 |
| PFL1620w                | asparagine and aspartate rich protein 1                 |     | 2.6 | 2.2 |
| PFE0665c                | GTP Binding protein                                     |     |     | 2.1 |
| PFC0235w                | conserved Plasmodium protein, unknown function          |     | 2.4 |     |
| PF11_0241               | conserved Plasmodium protein, unknown function          |     | 2.0 | 2.1 |
| PFB0615c                | conserved Plasmodium protein, unknown function          |     | 2.0 | 2.1 |
| PF14_0577               | conserved Plasmodium protein, unknown function          |     | 2.1 |     |
| PFL1430c                | conserved Plasmodium protein, unknown function          |     | 2.0 |     |
| PF11_0044               | iron-sulfur assembly protein, sufD                      |     | 2.0 |     |
| PF14_0325               | conserved Plasmodium membrane protein, unknown function | 2.2 |     |     |
| <b>Unknown function</b> |                                                         |     |     |     |
| PF13_0090a              | conserved Plasmodium protein, unknown function          |     |     | 2.4 |
| PFD0815c                | conserved Plasmodium protein, unknown function          |     | 2.2 |     |
| PFE0695w                | conserved Plasmodium protein, unknown function          |     |     | 2.1 |
| MAL13P1.172             | conserved protein, unknown function                     |     |     | 1.9 |
| MAL7P1.167              | conserved Plasmodium protein, unknown function          |     | 2.6 |     |
| PF07_0118               | conserved Plasmodium membrane protein, unknown function |     | 2.9 | 2.1 |
| PFD1065c                | conserved Plasmodium protein, unknown function          |     |     | 2.7 |
| PFE0725c                | conserved Plasmodium membrane protein, unknown function |     |     | 2.5 |
| MAL8P1.48               | splicing factor                                         |     |     | 2.2 |
| PF11_0419               | conserved Plasmodium protein, unknown function          |     | 2.1 | 2.3 |
| MAL13P1.12              | conserved Plasmodium membrane protein, unknown function |     |     | 2.8 |
| PF14_0463               | chloroquine resistance marker protein                   | 3.0 | 2.8 | 3.4 |
| MAL7P1.146              | conserved Plasmodium membrane protein, unknown function |     | 2.0 |     |
| PFB0600c                | conserved Plasmodium protein, unknown function          |     |     | 2.2 |
| MAL8P1.93               | conserved Plasmodium protein, unknown function          |     |     | 2.2 |
| PFE0385w                | conserved Plasmodium protein, unknown function          |     | 2.0 |     |
| PFF0280w                | conserved Plasmodium protein, unknown function          | 2.2 | 2.5 | 2.3 |
| MAL13P1.211             | conserved Plasmodium protein, unknown function          |     |     | 2.0 |
| PFF1270c                | conserved Plasmodium protein, unknown function          |     |     | 2.1 |
| PFE1255w                | conserved Plasmodium protein, unknown function          |     | 2.4 |     |
| PFF0280w                | conserved Plasmodium protein, unknown function          |     | 2.2 |     |
| MAL13P1.226             | conserved Plasmodium protein, unknown function          |     | 2.1 |     |
| PF13_0298               | conserved Plasmodium protein, unknown function          |     | 2.5 |     |
| MAL13P1.249             | conserved Plasmodium protein, unknown function          |     | 2.0 | 2.3 |
| PFF0920c-a              | conserved Plasmodium protein, unknown function          |     | 2.2 | 2.0 |
| PFF0980w                | conserved Plasmodium protein, unknown function          |     |     | 2.3 |
| MAL7P1.59               | hypothetical protein conserved in <i>P. falciparum</i>  | 2.0 |     |     |
| PFI1765c                | Plasmodium exported protein, unknown function           | 2.1 |     |     |
| PFI1725w                | Plasmodium exported protein, unknown function           | 3.7 |     |     |
| PF14_0726               | conserved Plasmodium protein, unknown function          | 2.0 |     |     |

|              |                                                         |     |     |
|--------------|---------------------------------------------------------|-----|-----|
| PFB0230c     | conserved Plasmodium protein, unknown function          | 2.2 |     |
| PFE1205c     | conserved Plasmodium membrane protein, unknown function | 2.1 |     |
| PF07_0119    | conserved Plasmodium protein, unknown function          | 2.2 |     |
| PFE0950c     | conserved Plasmodium protein, unknown function          | 2.3 |     |
| PFL0750w     | conserved Plasmodium protein, unknown function          | 2.1 |     |
| PF14_0693    | conserved Plasmodium protein, unknown function          | 2.0 |     |
| PF07_0004    | Plasmodium exported protein, unknown function           | 2.0 |     |
| MAL13P1.342a | conserved Plasmodium protein, unknown function          | 2.2 |     |
| PFE0315c     | conserved Plasmodium protein, unknown function          | 2.2 | 2.0 |
| PF11_0130    | conserved Plasmodium protein, unknown function          |     | 2.2 |
| PF14_0805    | conserved Plasmodium protein, unknown function          |     | 2.7 |
| PFE0220w     | conserved Plasmodium protein, unknown function          |     | 2.0 |
| PFB0620w     | conserved protein, unknown function                     |     | 2.2 |
| PF14_0633a   | conserved Plasmodium protein, unknown function          |     | 2.1 |
| PF11220w     | conserved protein, unknown function                     |     | 2.4 |
| PF14_0685    | conserved Plasmodium protein, unknown function          |     | 2.2 |
| PFF0240c     | conserved Plasmodium protein, unknown function          |     | 2.5 |
| PFE0510c     | conserved Plasmodium protein, unknown function          |     | 2.4 |
| PFL0220c     | conserved Plasmodium membrane protein, unknown function |     | 2.0 |
| PF14_0775    | conserved Plasmodium protein, unknown function          |     | 2.1 |
| PFD0325w     | conserved Plasmodium protein, unknown function          |     | 2.2 |
| PF14_0275    | conserved Plasmodium protein, unknown function          |     | 2.0 |
| PF10_0134    | conserved Plasmodium protein, unknown function          |     | 2.7 |
| PF13_0331    | conserved protein, unknown function                     |     | 2.0 |
| PF14_0272    | CPW-WPC family protein                                  |     | 2.2 |
| PF11_0550    | conserved Plasmodium protein, unknown function          |     | 2.3 |
| PFL2075c     | conserved Plasmodium protein, unknown function          |     | 2.1 |
| PFF0405c     | conserved Plasmodium protein, unknown function          |     | 2.0 |
| PF14_0087    | conserved Plasmodium protein, unknown function          |     | 2.5 |
| PF11390w     | conserved Plasmodium protein, unknown function          |     | 2.2 |
| PFF0545c     | conserved Plasmodium protein, unknown function          |     | 2.4 |
| PFL0515w     | conserved Plasmodium protein, unknown function          |     | 2.0 |
| PF10_0063a   | conserved Plasmodium protein, unknown function          |     | 2.2 |
| PF10840w     | conserved Plasmodium membrane protein, unknown function |     | 2.4 |
| PF14_0452a   | conserved Plasmodium protein, unknown function          |     | 2.0 |
| PF11_0128    | coq4 homolog                                            |     | 2.2 |
| PF14_0604a   | conserved Plasmodium protein, unknown function          |     | 2.0 |
| PF14_0287    | conserved Plasmodium protein, unknown function          |     | 2.6 |
| MAL13P1.129  | conserved Plasmodium protein, unknown function          |     | 2.0 |
| PF14_0490    | conserved Plasmodium protein, unknown function          |     | 2.1 |
| MAL8P1.380   | conserved Plasmodium protein, unknown function          |     | 2.4 |
| PF10_0035    | conserved Plasmodium protein, unknown function          |     | 2.3 |
| PFL0700w     | conserved Plasmodium protein, unknown function          |     | 2.0 |
| MAL8P1.77    | conserved Plasmodium protein, unknown function          |     | 2.1 |
| PFL1432w     | conserved Plasmodium protein, unknown function          |     | 2.3 |
| MAL13P1.46   | conserved Plasmodium protein, unknown function          |     | 2.2 |
| MAL13P1.217  | conserved Plasmodium protein, unknown function          |     | 2.5 |

|             |                                                         |     |
|-------------|---------------------------------------------------------|-----|
| PFL2340w    | conserved Plasmodium protein, unknown function          | 2.4 |
| MAL13P1.580 | conserved Plasmodium protein, unknown function          | 2.0 |
| PF14_060w   | conserved Plasmodium protein, unknown function          | 2.2 |
| PF14_0031b  | conserved Plasmodium protein, unknown function          | 2.5 |
| PF14_0645   | conserved Plasmodium protein, unknown function          | 2.4 |
| MAL8P1.25a  | conserved Plasmodium protein, unknown function          | 2.0 |
| MAL8P1.114  | conserved Plasmodium protein, unknown function          | 2.1 |
| PF0890w     | conserved Plasmodium protein, unknown function          | 2.3 |
| PF11_0545   | conserved Plasmodium protein, unknown function          | 2.0 |
| MAL13P1.305 | conserved Plasmodium protein, unknown function          | 2.1 |
| PFL2320w    | conserved Plasmodium protein, unknown function          | 2.2 |
| PF07_0008   | Plasmodium exported protein, unknown function           | 2.1 |
| PF11_0355   | conserved Plasmodium protein, unknown function          | 2.0 |
| PFL0623c-a  | conserved Plasmodium membrane protein, unknown function | 2.2 |
| MAL8P1.136  | conserved Plasmodium protein, unknown function          | 2.0 |
| PF10_0109   | conserved Plasmodium protein, unknown function          | 2.0 |
| PF14_0745   | probable protein, unknown function                      | 2.1 |
| PFL1805c    | conserved Plasmodium protein, unknown function          | 2.0 |
| MAL13P1.307 | conserved Plasmodium protein, unknown function          | 2.5 |
| PF10_0324   | conserved Plasmodium protein, unknown function          | 3.2 |
| PF11_0263   | conserved Plasmodium protein, unknown function          | 2.5 |
| PFL1695c    | conserved Plasmodium protein, unknown function          | 2.0 |
| PF0315c     | conserved Plasmodium protein, unknown function          | 2.1 |
| PF14_0482   | conserved Plasmodium protein, unknown function          | 2.0 |
| PFL1800w    | conserved Plasmodium protein, unknown function          | 2.3 |
| MAL13P1.70  | conserved Plasmodium membrane protein, unknown function | 2.2 |
| PF14_0454   | conserved Plasmodium protein, unknown function          | 2.1 |
| PF14_0131   | conserved Plasmodium protein, unknown function          | 2.3 |
| PF07_0082   | conserved Plasmodium membrane protein, unknown function | 2.5 |
| PF08_0122   | conserved Plasmodium protein, unknown function          | 2.1 |
| PF11_0433   | conserved Plasmodium protein, unknown function          | 2.3 |
| PFC1075w    | hypothetical protein                                    | 2.7 |
| PFA0320w    | conserved Plasmodium protein, unknown function          | 2.0 |
| PF14_0226   | conserved Plasmodium protein, unknown function          | 2.2 |
| PF14_0084   | conserved Plasmodium protein, unknown function          | 2.2 |
| MAL13P1.145 | conserved Plasmodium protein, unknown function          | 2.1 |
| PF0220w     | conserved Plasmodium protein, unknown function          | 2.0 |
| PF14_0594   | conserved Plasmodium protein, unknown function          | 2.0 |
| MAL8P1.60   | conserved Plasmodium protein, unknown function          | 2.3 |
| PF0065c     | Plasmodium exported protein, unknown function, fragment | 2.2 |
| PFL2560c    | Plasmodium exported protein, unknown function           | 2.5 |
| PF11_0324   | conserved Plasmodium protein, unknown function          | 2.0 |
| PF14_0613   | conserved Plasmodium membrane protein, unknown function | 2.2 |
| PFL1795c    | conserved Plasmodium protein, unknown function          | 2.0 |
| MAL8P1.7    | conserved Plasmodium protein, unknown function          | 2.1 |
| PF0630c     | conserved Plasmodium protein, unknown function          | 2.5 |
| PF07_0097   | conserved Plasmodium protein, unknown function          | 2.3 |

|             |                                                            |     |     |
|-------------|------------------------------------------------------------|-----|-----|
| PF13_0161   | conserved Plasmodium protein, unknown function             | 2.2 |     |
| PFI1150w    | conserved Plasmodium protein, unknown function             | 2.7 |     |
| PF14_0667   | conserved Plasmodium protein, unknown function             | 2.1 |     |
| PF14_0402   | conserved Plasmodium protein, unknown function             | 2.3 |     |
| PFD0075w    | conserved Plasmodium falciparum protein family             | 2.2 |     |
| PFB0227c    | conserved Plasmodium protein, unknown function             | 2.2 |     |
| PFL0290w    | conserved Plasmodium protein, unknown function             | 2.0 |     |
| PFL0200c    | conserved Plasmodium protein, unknown function             | 2.2 |     |
| PF10_0198   | conserved Plasmodium protein, unknown function             | 2.5 |     |
| PF14_0759   | conserved Plasmodium protein, unknown function, pseudogene | 2.1 |     |
| PFD0840w    | conserved Plasmodium protein, unknown function             | 2.4 |     |
| PF14_0706   | conserved Plasmodium protein, unknown function             | 2.1 |     |
| MAL7P1.173  | Plasmodium exported protein, unknown function              | 2.0 |     |
| PF10_0234   | conserved Plasmodium protein, unknown function             | 2.2 |     |
| PFL1865w    | conserved Plasmodium protein, unknown function             | 2.1 |     |
| PFB0460c    | conserved Plasmodium protein, unknown function             | 2.0 |     |
| PF10_0171   | conserved Plasmodium protein, unknown function             | 2.0 |     |
| PF11_0213   | conserved Plasmodium protein, unknown function             | 2.1 |     |
| PFB0601c    | conserved Plasmodium protein, unknown function             | 2.1 | 2.0 |
| PFI1225w    | conserved Plasmodium protein, unknown function             | 2.4 | 2.2 |
| PF11_0535   | conserved Plasmodium protein, unknown function             | 2.0 | 2.7 |
| PF14_0340   | conserved Plasmodium protein, unknown function             | 2.3 | 2.5 |
| MAL13P1.29  | conserved Plasmodium protein, unknown function             | 2.4 | 2.0 |
| PFC0230c    | conserved Plasmodium protein, unknown function             | 2.2 | 2.8 |
| PF10_0140   | conserved protein, unknown function                        | 2.1 | 3.0 |
| PFC1060c    | conserved Plasmodium protein, unknown function             | 2.8 | 2.4 |
| PF11_0456   | conserved Plasmodium protein, unknown function             | 2.4 | 2.0 |
| MAL13P1.202 | conserved Plasmodium protein, unknown function             | 2.5 | 2.1 |
| PFB0980w    | conserved Plasmodium falciparum protein family             | 2.9 | 2.1 |
| MAL13P1.262 | conserved Plasmodium protein, unknown function             | 3.9 | 2.1 |
| PF14_0686   | conserved Plasmodium protein, unknown function             | 2.2 | 2.7 |
| PFI0495w    | conserved Plasmodium protein, unknown function             | 2.0 | 2.2 |
| PFE1485w    | conserved Plasmodium protein, unknown function             | 2.5 | 2.1 |
| PFL0350c    | conserved Plasmodium protein, unknown function             | 2.0 | 2.1 |
| PFC0570c    | conserved Plasmodium protein, unknown function             | 2.2 | 2.1 |
| PF10_0199   | conserved Plasmodium membrane protein, unknown function    | 2.4 | 2.1 |
| MAL13P1.133 | conserved Plasmodium membrane protein, unknown function    | 2.0 | 2.0 |
| PFF0445w    | conserved Plasmodium protein, unknown function             | 2.1 | 2.3 |
| MAL7P1.129  | conserved Plasmodium protein, unknown function             | 2.4 | 2.5 |
| PFD0585c    | conserved Plasmodium protein, unknown function             | 2.0 | 2.4 |
| PFE0250w    | conserved Plasmodium protein, unknown function             | 2.7 | 2.0 |
| PF11_0279   | conserved Plasmodium protein, unknown function             | 2.1 | 2.1 |
| PFB0765w    | conserved Plasmodium protein, unknown function             | 2.0 | 2.0 |
| PF11_0479   | conserved Plasmodium protein, unknown function             | 2.3 | 2.2 |
| MAL7P1.142  | conserved Plasmodium membrane protein, unknown function    |     | 2.2 |
| PFC0705c    | conserved Plasmodium protein, unknown function             | 2.1 |     |
| MAL13P1.39  | conserved Plasmodium protein, unknown function             | 2.0 |     |

|            |                                                |     |     |     |
|------------|------------------------------------------------|-----|-----|-----|
| PF14_0552  | conserved Plasmodium protein, unknown function |     | 2.2 | 2.0 |
| PF11_0448  | conserved Plasmodium protein, unknown function | 2.2 |     |     |
| PF10_0373a | conserved Plasmodium protein, unknown function |     |     | 2.1 |
| PF14_0249  | conserved Plasmodium protein, unknown function |     | 2.4 |     |
| PFD1115c   | conserved Plasmodium protein, unknown function |     | 2.0 |     |
| PF10_0052  | conserved Plasmodium protein, unknown function | 2.1 |     |     |

## Down-regulated gens in DHA1

| Transport                     |                                                                        |      |      |      |
|-------------------------------|------------------------------------------------------------------------|------|------|------|
| PF08_0069                     | importin beta                                                          |      | -2.2 |      |
| PF11_0112                     | vacuolar sorting protein 35                                            | -2.7 | -2.7 |      |
| PFD0255w                      | ag-1 blood stage membrane protein homologue                            |      | -2.2 | -3.0 |
| PFE1400c                      | beta adaptin protein                                                   |      | -2.0 |      |
| PF08_0078                     | ABC transporter                                                        |      |      | -2.1 |
| PF13_0019                     | sodium/hydrogen exchanger, Na <sup>+</sup> , H <sup>+</sup> antiporter | -2.4 |      |      |
| PFA0245w                      | transporter                                                            |      | -2.0 |      |
| PFC0125w                      | ABC transporter, (TAP family)                                          |      | -2.3 | -2.1 |
| PFE0410w                      | triose phosphate transporter                                           |      | -2.1 |      |
| PFE1185w                      | transporter                                                            | -2.0 | -2.1 |      |
| PFL0420w                      | amino acid transporter                                                 |      | -2.2 | -2.0 |
| Translation and transcription |                                                                        |      |      |      |
| PFF1185w                      | SNF2 helicase                                                          | -2.1 |      |      |
| MAL13P1.328                   | DNA topoisomerase VI, b subunit                                        |      | -2.4 |      |
| PF10_0232                     | chromodomain-helicase-DNA-binding protein 1 homolog                    |      |      | -2.7 |
| PF13_0179                     | isoleucine-tRNA ligase                                                 | -2.1 | -2.1 |      |
| PF13_0184                     | U3 snoRNA-associated small subunit rRNA processing                     | -2.0 |      | -2.0 |
| PF13_0354                     | alanine-tRNA ligase                                                    | -2.4 |      |      |
| PF14_0194                     | spliceosome-associated protein                                         |      | -2.2 |      |
| PF14_0374                     | CCAAT-binding transcription factor                                     | -2.0 |      |      |
| PF14_0456                     | U3 snoRNA-associated small subunit rRNA processing protein             | -2.8 |      |      |
| PF14_0589                     | valine-tRNA ligase                                                     | -2.1 | -2.5 |      |
| PFC0441c-a                    | SAC3/GNAP family-related protein                                       |      | -2.2 |      |
| PFE0090w                      | chromosome assembly factor 1                                           |      | -2.0 | -2.4 |
| PFE0330w                      | conserved Plasmodium protein, unknown function                         |      | -2.1 |      |
| PFE0430w                      | ATP-dependent RNA helicase                                             |      | -2.4 | -2.0 |
| PFI0295c                      | RNB-like protein                                                       | -2.2 |      |      |
| PFI1235w                      | rRNA processing and telomere maintaining methyltransferase             | -2.1 |      |      |
| PFI1260c                      | histone deacetylase                                                    |      | -2.3 |      |
| PFL0465c                      | zinc finger transcription factor (krox1)                               |      |      | -2.1 |
| PFE0450w                      | chromosome condensation protein                                        |      | -2.8 | -2.2 |
| Structure                     |                                                                        |      |      |      |
| MAL13P1.69                    | septum formation protein MAF homologue                                 |      | -2.1 |      |
| PF08_0125                     | tubulin gamma chain                                                    |      | -2.0 |      |
| PF10_0262                     | conserved Plasmodium protein, unknown function                         |      |      | -2.4 |
| PF14_0507                     | conserved Plasmodium protein, unknown function                         |      |      | -2.3 |
| PF10_0193                     | microtubule-associated protein 1 light chain 3                         |      | -2.0 |      |



| <b>Signal Transduction</b>           |                                                        |      |      |
|--------------------------------------|--------------------------------------------------------|------|------|
| PF11_0321                            | serpentine receptor                                    | -2.1 |      |
| MAL13P1.169                          | syntaxin, Qa-SNARE family                              |      | -2.1 |
| MAL13P1.278                          | serine/threonine protein kinase                        | -2.0 |      |
| MAL7P1.18                            | serine/threonine protein kinase                        | -2.4 |      |
| MAL8P1.203                           | serine/threonine protein kinase, FIKK family           | -2.3 |      |
| PF07_0038                            | Cg7 protein                                            |      | -2.1 |
| PF08_0129                            | serine/threonine protein phosphatase                   |      | -2.3 |
| PF10_0177a                           | serine/threonine protein phosphatase                   | -2.0 |      |
| PF11_0464                            | serine/threonine protein kinase                        |      | -2.1 |
| PF14_0407                            | guanine nucleotide exchange factor                     |      | -2.5 |
| PFC0060c                             | serine/threonine protein kinase, FIKK family           | -2.0 |      |
| PFE1195w                             | karyopherin beta                                       | -2.1 |      |
| <b>Pathogenesis</b>                  |                                                        |      |      |
| PFL1530w                             | asparagine-rich protein                                | -2.3 |      |
| MAL13P1.269                          | tryptophan-rich antigen                                |      | -2.0 |
| MAL13P1.490                          | stevor                                                 | -2.1 | -2.3 |
| MAL13P1.495                          | rifin                                                  | -2.3 | -2.0 |
| MAL7P1.208                           | rhoptry-associated membrane antigen                    |      | -2.2 |
| PF10_0162                            | Plasmodium exported protein (PHISTc), unknown function | -2.0 |      |
| PF10_0343                            | S-antigen                                              |      | -2.2 |
| PF10_0025                            | PF70 protein                                           | -2.4 |      |
| PF11_0344                            | apical membrane antigen 1                              |      | -2.1 |
| PF11_0509                            | ring-infected erythrocyte surface antigen              |      | -2.0 |
| PFA0010c                             | rifin                                                  |      | -2.1 |
| PFA0110w                             | ring-infected erythrocyte surface antigen              | -2.0 |      |
| PFA0125c                             | erythrocyte binding antigen-181                        |      | -2.0 |
| PFA0280w                             | asparagine-rich antigen Pfa35-2                        |      | -2.4 |
| PFB0075c                             | Plasmodium exported protein (hyp9), unknown function   |      | -2.5 |
| PFB0335c                             | serine repeat antigen 6                                |      | -2.0 |
| PFB0360c                             | serine repeat antigen 1                                | -2.0 |      |
| PFB0915w                             | liver stage antigen 3                                  |      | -2.1 |
| PFB1050w                             | rifin                                                  |      | -2.1 |
| PFD0080c                             | Plasmodium exported protein (PHISTb), unknown function |      | -2.4 |
| PFD1155w                             | erythrocyte binding antigen-165                        |      | -2.1 |
| PFL0010c                             | rifin                                                  | -2.2 |      |
| PFL0025c                             | rifin                                                  |      | -2.3 |
| PFL0050c                             | Plasmodium exported protein (PHISTb), unknown function |      | -2.2 |
| <b>Motor activity</b>                |                                                        |      |      |
| PFE0255w                             | actin-like protein                                     |      | -2.2 |
| PFF0675c                             | myosin E                                               | -2.0 |      |
| <b>DNA replication and repairing</b> |                                                        |      |      |
| MAL7P1.21                            | origin recognition complex subunit 2                   | -2.4 |      |
| PF14_0308                            | conserved Plasmodium protein, unknown function         | -2.0 |      |
| PFE0160c                             | Ser/Arg-rich splicing factor                           | -2.1 |      |
| <b>Chaperone</b>                     |                                                        |      |      |
| PF11_0099                            | heat shock protein DnaJ homologue Pfj2                 |      | -2.0 |

|                                      |                                                                |      |      |
|--------------------------------------|----------------------------------------------------------------|------|------|
| PF11_0513                            | DnaJ protein                                                   | -2.2 | -2.0 |
| PFF0485c                             | zinc finger protein                                            |      | -2.1 |
| PFL1425w                             | T-complex protein 1, gamma subunit                             | -2.2 | -2.0 |
| PFL2550w                             | DnaJ protein                                                   |      | -2.1 |
| PFL0355c                             | small subunit rRNA processing factor                           | -2.2 |      |
| <b>Cell Cycle and Invasion</b>       |                                                                |      |      |
| PF10_0345                            | merozoite surface protein 3                                    |      | -2.4 |
| PF13_0191                            | MSP7-like protein                                              | -2.1 |      |
| PF14_0261                            | proliferation-associated protein 2g4                           | -2.4 |      |
| PFB0300c                             | merozoite surface protein 2                                    |      | -2.0 |
| <b>Metabolism/Catalytic activity</b> |                                                                |      |      |
| MAL13P1.210                          | dolichyl-phosphate-mannose-glygolipidalpha-mannosyltransferase |      | -2.0 |
| MAL13P1.260                          | alveolin                                                       |      | -2.1 |
| MAL13P1.285                          | patatin-like phospholipase                                     | -2.3 |      |
| MAL13P1.310                          | calpain                                                        |      | -2.3 |
| MAL13P1.326                          | ferrochelatase                                                 |      | -2.0 |
| MAL8P1.150                           | adenylyl cyclase beta                                          |      | -2.1 |
| PF10_0149                            | cysteinyl-tRNA synthetase                                      | -2.0 |      |
| PF11_0168a                           | serine esterase                                                | -2.1 |      |
| PF11_0252                            | neutral-sphingomyelinase activation factor protein             | -2.0 |      |
| PF11_0362                            | protein phosphatase                                            |      | -2.2 |
| PF14_0063                            | ATP-dependent Clp protease                                     |      | -2.0 |
| PF14_0511                            | glucose-6-phosphate dehydrogenase-6-phosphogluconolactonase    | -2.1 | -2.2 |
| PF14_0614                            | phosphatase                                                    | -2.0 |      |
| PFA0500w                             | human hepatopietin-like protein                                | -2.5 |      |
| PFC0050c                             | acyl-CoA synthetase                                            | -2.0 |      |
| PFC0275w                             | FAD-dependent glycerol-3-phosphate dehydrogenase               |      | -2.5 |
| PFD0085c                             | acyl-CoA synthetase, PfACS6                                    |      | -2.0 |
| PFD0390c                             | AAA family ATPase                                              |      | -2.2 |
| PFI1020c                             | inosine-5'-monophosphate dehydrogenase                         | -2.0 |      |
| PFL0675c                             | conserved Plasmodium protein, unknown function                 | -2.2 |      |
| PFL1870c                             | sphingomyelin phosphodiesterase                                |      | -2.7 |
| MAL13P1.114                          | conserved Plasmodium protein, unknown function                 |      | -2.0 |
| MAL8P1.75                            | ubiquitin-activating enzyme                                    |      | -2.0 |
| PF08_0020                            | ubiquitination-mediated degradation component                  |      | -2.1 |
| PF11_0298                            | GPI8p transamidase                                             |      | -2.3 |
| PF11_0481                            | tubulin-tyrosine ligase                                        | -2.0 | -2.0 |
| PF11_0049                            | NOT family protein                                             |      | -2.1 |
| PF13_0229                            | aconitase                                                      |      | -2.0 |
| PFD0780w                             | glutamyl-tRNA(Gln) amidotransferase subunit A                  |      | -2.1 |
| PFF1275c                             | 3-oxoacyl-acyl-carrier protein synthase I/II                   |      | -2.1 |
| PFL2100w                             | ubiquitin conjugating enzyme E2                                | -2.0 | -2.9 |
| PF13_0066                            | malonyl CoA-acyl carrier protein transacylase precursor        |      | -2.0 |
| PF13_0227                            | vacuolar ATP synthase subunit d                                | -2.4 |      |
| PF14_0541                            | V-type H( )-translocating pyrophosphatase                      |      | -2.0 |
| <b>Binding</b>                       |                                                                |      |      |
| PFF0595c                             | leucine-rich repeat protein                                    |      | -2.2 |

|                         |                                                          |      |      |      |
|-------------------------|----------------------------------------------------------|------|------|------|
| MAL13P1.238             | leucine-rich repeat protein                              |      |      | -2.0 |
| MAL8P1.101              | RNA binding protein                                      | -2.1 |      |      |
| PF07_0017               | phosphoinositide-binding protein                         | -2.0 |      |      |
| PF08_0086               | RNA binding protein                                      | -2.0 |      |      |
| PF10_0015               | acyl-CoA binding protein, isoform 1, ACBP1               |      | -2.2 | -2.1 |
| PF10_0047               | RNA binding protein                                      | -2.1 |      |      |
| PF10_0146               | conserved Plasmodium protein, unknown function           |      |      | -2.2 |
| PF11_0429               | conserved Plasmodium protein, unknown function           |      | -2.0 |      |
| PF13_0257               | glutamate--tRNA ligase                                   | -2.1 |      |      |
| PF14_0201               | surface protein, Pf113                                   | -2.1 |      |      |
| PFC0760c                | conserved Plasmodium protein, unknown function           |      |      | -2.0 |
| PFD0110w                | normocyte binding protein 1,reticulocyte binding protein |      |      | -2.4 |
| PFD0295c                | apical sushi protein                                     | -8.0 | -2.2 | -4.4 |
| PFD0535w                | conserved Plasmodium protein, unknown function           |      |      | -2.0 |
| PFD1150c                | reticulocyte binding protein homologue 4                 |      |      | -2.2 |
| PFF1000w                | cleavage stimulation factor subunit 1-like protein       |      | -2.1 | -2.0 |
| PFL1930w                | conserved Plasmodium protein, unknown function           |      |      | -2.0 |
| PFL2520w                | reticulocyte binding protein homologue 3, pseudogene     |      |      | -2.1 |
| PFC0345w                | conserved Plasmodium protein, unknown function           | -7.7 | -4.1 | -9.4 |
| PFE0440w                | conserved Plasmodium protein, unknown function           |      |      | -2.2 |
| PFB0145c                | conserved Plasmodium protein, unknown function           |      |      | -2.0 |
| <b>Unknown function</b> |                                                          |      |      |      |
| MAL8P1.36               | conserved Plasmodium protein, unknown function           | -2.1 |      |      |
| MAL8P1.88               | conserved Plasmodium protein, unknown function           | -2.1 |      |      |
| MAL13P1.189             | conserved Plasmodium membrane protein, unknown function  |      | -2.0 |      |
| MAL13P1.237a            | conserved Plasmodium protein, unknown function           |      | -2.3 |      |
| PF10_0070a              | conserved Plasmodium protein, unknown function           |      | -2.2 |      |
| PF10_0189               | conserved Plasmodium protein, unknown function           |      |      | -2.1 |
| PF11_0342               | conserved Plasmodium protein, unknown function           |      |      | -2.0 |
| PF11_0392               | conserved Plasmodium protein, unknown function           |      |      | -2.3 |
| PF11_0439               | conserved protein, unknown function                      | -2.2 |      |      |
| PF13_0162               | conserved Plasmodium protein, unknown function           | -2.0 |      |      |
| PF14_0093               | conserved Plasmodium protein, unknown function           |      |      | -2.1 |
| PF14_0184               | conserved Plasmodium protein, unknown function           |      |      | -2.1 |
| PF14_0355               | conserved Plasmodium membrane protein, unknown function  |      | -2.2 |      |
| PF14_0762               | Plasmodium exported protein, unknown function            |      |      | -2.0 |
| PFA0205w                | conserved Plasmodium membrane protein, unknown function  |      | -2.2 |      |
| PFA0270c                | conserved Plasmodium protein, unknown function           |      | -2.1 |      |
| PFC0265c                | conserved Plasmodium protein, unknown function           | -2.1 |      |      |
| PFD0925w                | conserved Plasmodium protein, unknown function           |      | -2.1 |      |
| PFE1555c                | conserved Plasmodium protein, unknown function           |      |      | -2.0 |
| PFF0810c                | conserved Plasmodium protein, unknown function           |      | -2.0 |      |
| PFF1090c                | conserved Plasmodium membrane protein, unknown function  |      | -2.1 |      |
| PFI0850w                | conserved Plasmodium protein, unknown function           |      |      | -2.2 |
| PFI1210w                | conserved Plasmodium protein, unknown function           |      |      | -2.0 |
| PFI1385c                | conserved Plasmodium protein, unknown function           |      | -2.2 |      |
| PFL1000c                | conserved Plasmodium protein, unknown function           |      |      | -2.1 |

|            |                                                |      |      |      |
|------------|------------------------------------------------|------|------|------|
| PFL1060c   | conserved protein, unknown function            |      | -2.3 |      |
| PFL1835w   | conserved Plasmodium protein, unknown function | -2.0 |      |      |
| PFL2575c   | Plasmodium exported protein, unknown function  |      |      | -2.2 |
| PF10_0331a | conserved Plasmodium protein, unknown function | -2.1 | -2.0 | -2.2 |
| PF13_0072  | conserved Plasmodium protein, unknown function | -2.0 |      | -2.0 |

---

**Table S3. Genes with  $\geq 2$ -fold changes in expression in DHA1 in response to DHA treatment (DHA/control)**

**UP-regulated**

| Gene Id                              | Gene Description                                              | Fold change |     |     |
|--------------------------------------|---------------------------------------------------------------|-------------|-----|-----|
|                                      |                                                               | R           | T   | S   |
| <b>Transport</b>                     |                                                               |             |     |     |
| PF08_0069                            | importin beta                                                 |             | 2.0 |     |
| PF10_0193                            | microtubule-associated protein 1 light chain 3                |             | 2.2 |     |
| PF11_0112                            | vacuolar sorting protein 35                                   |             | 2.4 |     |
| PF13_0324                            | Sec24 subunit a                                               | 2.1         | 2.7 |     |
| PFE1400c                             | beta adaptin protein                                          |             | 2.2 |     |
| PF13_0359                            | mitochondrial carrier protein                                 |             |     | 2.1 |
| MAL13P1.256                          | phosphatidylinositol transfer protein                         |             |     | 2.4 |
| PF08_0078                            | ABC transporter                                               |             |     | 2.0 |
| PF13_0019                            | sodium/hydrogen exchanger, Na , H antiporter                  | 2.2         |     |     |
| PFA0245w                             | transporter                                                   |             | 2.1 |     |
| PFB0465c                             | monocarboxylate transporter                                   |             | 2.9 |     |
| PFC0125w                             | ABC transporter, (TAP family)                                 |             | 2.5 | 2.1 |
| PFE0410w                             | triose phosphate transporter                                  |             | 2.1 |     |
| PFE1185w                             | transporter                                                   | 2.0         | 2.8 |     |
| PFL0420w                             | amino acid transporter                                        |             | 2.1 | 2.0 |
| PFE0785c                             | metabolite/drug transporter                                   |             | 2.4 |     |
| <b>Translation and transcription</b> |                                                               |             |     |     |
| PFF1185w                             | SNF2 helicase                                                 | 2.4         |     |     |
| PF08_0018                            | translation initiation factor-like protein                    |             |     | 2.2 |
| PFE0160c                             | Ser/Arg-rich splicing factor                                  | 2.1         |     |     |
| MAL8P1.83                            | eukaryotic translation initiation factor                      | 2.0         |     |     |
| PF08_0012                            | SET domain protein                                            | 2.0         |     |     |
| PF10_0232                            | chromodomain-helicase-DNA-binding protein 1 homolog           | 2.1         |     | 2.1 |
| PF13_0179                            | isoleucine-tRNA ligase                                        | 2.5         | 2.3 |     |
| PF13_0184                            | U3 snoRNA-associated small subunit rRNA processing associated | 2.4         | 2.1 |     |
| PF13_0354                            | alanine--tRNA ligase                                          | 2.2         |     |     |
| PF14_0185                            | ATP-dependent RNA helicase                                    |             | 2.1 | 2.4 |
| PF14_0194                            | spliceosome-associated protein                                |             | 2.0 |     |
| PF14_0374                            | CCAAT-binding transcription factor                            | 2.1         |     |     |
| PF14_0456                            | U3 snoRNA-associated small subunit rRNA processing protein    | 2.1         |     |     |
| PF14_0589                            | valine-tRNA ligase                                            | 2.0         | 2.2 |     |
| PF14_0633                            | transcription factor with AP2 domain(s)                       | 2.8         |     |     |
| PF14_0656                            | U2 snRNP auxiliary factor                                     | 2.1         |     |     |
| PFA0510w                             | bromodomain protein                                           |             | 2.7 | 2.1 |
| PFE0090w                             | chromosome assembly factor 1                                  |             | 2.0 | 2.1 |
| PFE0330w                             | conserved Plasmodium protein, unknown function                |             | 2.2 |     |
| PFE0430w                             | ATP-dependent RNA helicase                                    |             | 2.1 | 2.4 |
| PFI0295c                             | RNB-like protein                                              | 2.2         |     |     |
| PF11235w                             | rRNA processing and telomere maintaining methyltransferase    | 2.0         |     |     |
| PF11260c                             | histone deacetylase                                           |             | 2.5 |     |
| PFL0465c                             | zinc finger transcription factor (krox1)                      |             |     | 2.4 |
| PFE0400w                             | SET domain protein                                            |             | 2.2 |     |
| PF13_0235                            | transcription factor with AP2 domain(s)                       |             |     | 2.7 |
| <b>Structure</b>                     |                                                               |             |     |     |
| MAL13P1.69                           | septum formation protein MAF homologue                        |             | 2.0 |     |
| PF08_0125                            | tubulin gamma chain                                           |             | 2.1 |     |
| PF10_0262                            | conserved Plasmodium protein, unknown function                |             |     | 2.3 |

|           |                                                |     |     |
|-----------|------------------------------------------------|-----|-----|
| PF11_0481 | tubulin-tyrosine ligase                        | 2.1 | 2.4 |
| PF14_0507 | conserved Plasmodium protein, unknown function |     | 2.1 |
| PFE1550w  | conserved Plasmodium protein, unknown function | 2.2 |     |
| PFF0380w  | conserved Plasmodium protein, unknown function | 2.0 |     |
| PF11185c  | conserved Plasmodium protein, unknown function |     | 2.0 |
| PFE0450w  | chromosome condensation protein                | 2.2 | 2.1 |

---

**Signal transduction**

---

|             |                                                |     |         |
|-------------|------------------------------------------------|-----|---------|
| PF11_0321   | serpentine receptor                            | 2.2 |         |
| MAL13P1.169 | syntaxin, Qa-SNARE family                      |     | 2.3     |
| MAL13P1.278 | serine/threonine protein kinase                | 2.2 |         |
| MAL8P1.203  | serine/threonine protein kinase, FIKK family   | 2.4 |         |
| PF07_0038   | Cg7 protein                                    |     | 2.3     |
| PF08_0129   | serine/threonine protein phosphatase           |     | 2.2     |
| PF10_0177a  | serine/threonine protein phosphatase           | 2.5 |         |
| PF11_0464   | serine/threonine protein kinase                |     | 2.1 2.0 |
| PF13_0210   | conserved Plasmodium protein, unknown function |     | 2.0     |
| PF14_0407   | guanine nucleotide exchange factor             |     | 2.2     |
| PF14_0733   | serine/threonine protein kinase, FIKK family   | 2.1 | 2.1     |
| PF14_0734   | serine/threonine protein kinase, FIKK family   | 2.2 | 2.0     |
| PFC0060c    | serine/threonine protein kinase, FIKK family   | 2.0 |         |
| PFC0595c    | serine/threonine protein phosphatase           | 2.1 |         |
| PFE1195w    | karyopherin beta                               | 2.0 |         |
| MAL7P1.18   | serine/threonine protein kinase                | 2.0 | 2.0     |
| PF10_0072   | conserved Plasmodium protein, unknown function |     | 2.2     |

---

**Pathogenesis**

---

|             |                                                        |     |         |
|-------------|--------------------------------------------------------|-----|---------|
| PFB0100c    | knob-associated histidine-rich protein                 |     | 2.1     |
| MAL13P1.269 | tryptophan-rich antigen                                |     | 2.4     |
| MAL13P1.490 | stevor                                                 | 7.7 | 2.1     |
| MAL13P1.495 | rifin                                                  | 5.1 | 2.0     |
| PF10_0026   | tryptophan-rich antigen 3                              | 2.5 | 2.2     |
| PF10_0162   | Plasmodium exported protein (PHISTc), unknown function | 2.0 |         |
| PF10_0343   | S-antigen                                              |     | 2.0     |
| PF11_0111   | asparagine-rich antigen                                | 2.1 | 2.7     |
| PF11_0344   | apical membrane antigen 1                              | 3.0 |         |
| PF11_0509   | ring-infected erythrocyte surface antigen              |     | 2.0     |
| PFA0010c    | rifin                                                  |     | 7.8     |
| PFA0110w    | ring-infected erythrocyte surface antigen              | 2.1 |         |
| PFA0125c    | erythrocyte binding antigen-181                        |     | 2.0     |
| PFA0280w    | asparagine-rich antigen Pfa35-2                        |     | 2.4 2.0 |
| PFA0680c    | Pfmc-2TM Maurer's cleft two transmembrane protein      | 8.7 |         |
| PF10_0025   | PF70 protein                                           | 2.1 |         |
| PFB0075c    | Plasmodium exported protein (hyp9), unknown function   |     | 2.5     |
| PFB0095c    | erythrocyte membrane protein 3                         |     | 2.0     |
| PFB0360c    | serine repeat antigen 1                                | 2.1 |         |
| PFB0915w    | liver stage antigen 3                                  |     | 2.1     |
| PFB1050w    | Rifin                                                  |     | 2.9     |
| PFD0080c    | Plasmodium exported protein (PHISTb), unknown function | 5.1 |         |
| PFD1155w    | erythrocyte binding antigen-165                        | 2.0 |         |
| PFD1205w    | Plasmodium exported protein (hyp15), unknown function  |     | 3.7     |
| PFE0830c    | sporozoite surface antigen MB2                         |     | 2.2     |
| PFL0010c    | rifin                                                  | 3.7 |         |
| PFL0025c    | rifin                                                  |     | 3.3     |
| PFL0050c    | Plasmodium exported protein (PHISTb), unknown function |     | 5.1     |

|                                      |                                                             |     |     |
|--------------------------------------|-------------------------------------------------------------|-----|-----|
| PFB0335c                             | serine repeat antigen 6                                     |     | 2.0 |
| MAL7P1.225-b                         | Plasmodium exported protein (PHISTA-like), unknown function |     | 2.4 |
| PF07_0004                            | Plasmodium exported protein, unknown function               |     | 2.2 |
| PFD0055w                             | rifin                                                       |     | 3.4 |
| <b>Motor activity</b>                |                                                             |     |     |
| PF07_0042                            | conserved Plasmodium protein, unknown function              |     | 2.0 |
| PFE0440w                             | conserved Plasmodium protein, unknown function              |     | 2.1 |
| PFC0960c                             | microtubule and actin binding protein                       | 2.2 |     |
| PFF0675c                             | myosin E                                                    | 2.4 |     |
| PFE0255w                             | actin-like protein                                          |     | 2.0 |
| PF10_0361                            | conserved Plasmodium protein, unknown function              |     | 2.1 |
| PFC0770c                             | kinesin-like protein                                        |     | 2.7 |
| <b>DNA replication and repairing</b> |                                                             |     |     |
| MAL13P1.328                          | DNA topoisomerase VI, b subunit                             |     | 2.2 |
| MAL7P1.21                            | origin recognition complex subunit 2                        | 2.1 |     |
| PF14_0308                            | conserved Plasmodium protein, unknown function              | 2.0 |     |
| PFD0590c                             | DNA polymerase alpha                                        |     | 2.1 |
| <b>Chaperone</b>                     |                                                             |     |     |
| PF11_0099                            | heat shock protein DnaJ homologue Pfj2                      |     | 2.0 |
| PF11_0513                            | DnaJ protein                                                | 2.1 | 2.1 |
| PFL1425w                             | T-complex protein 1, gamma subunit                          | 2.5 | 2.1 |
| PF11_0170                            | cyclophilin                                                 |     | 2.0 |
| PFL2550w                             | DnaJ protein                                                |     | 2.1 |
| PF10_0276                            | zinc finger, C3HC4 type                                     | 2.2 |     |
| PFF0485c                             | zinc finger protein                                         |     | 2.0 |
| PF13_0310                            | small subunit rRNA processing factor                        | 2.0 |     |
| PFL0355c                             | small subunit rRNA processing factor                        | 2.1 |     |
| <b>Cell cycle and invasion</b>       |                                                             |     |     |
| PF10_0345                            | merozoite surface protein 3                                 |     | 2.0 |
| MAL7P1.208                           | rhoptry-associated membrane antigen                         |     | 2.3 |
| PF13_0191                            | MSP7-like protein                                           | 2.0 |     |
| PF14_0261                            | proliferation-associated protein 2g4                        | 2.1 |     |
| PFC0165w                             | spindle pole body protein                                   |     | 3.9 |
| PFI1490c-a                           | cyclophilin-like protein                                    |     | 2.1 |
| PFL1330c                             | cyclin                                                      |     | 2.3 |
| MAL7P1.119                           | rhoptry-associated leucine zipper-like protein 1            |     | 2.2 |
| PFE0080c                             | rhoptry-associated protein 2                                |     | 2.2 |
| MAL8P1.73                            | rhoptry neck protein 5                                      |     | 2.0 |
| MAL13P1.96                           | chromosome segregation protein                              | 2.1 |     |
| PFB0300c                             | merozoite surface protein 2                                 |     | 2.0 |
| <b>Catalytic/Metabolic activity</b>  |                                                             |     |     |
| MAL13P1.202                          | conserved Plasmodium protein, unknown function              |     | 2.2 |
| MAL13P1.284                          | pyrroline carboxylate reductase                             |     | 2.1 |
| MAL13P1.550                          | cytochrome c2 precursor                                     |     | 2.0 |
| MAL7P1.159                           | 1-cys peroxiredoxin                                         | 2.2 |     |
| MAL7P1.26                            | O-sialoglycoprotein endopeptidase                           |     | 2.1 |
| MAL7P1.310                           | conserved Plasmodium membrane protein, unknown function     |     | 2.1 |
| MAL8P1.133                           | glycosyltransferase family 28 protein                       | 2.0 |     |
| MAL8P1.154                           | conserved Plasmodium protein, unknown function              |     | 2.2 |
| MAL8P1.220                           | dehydrodolichyl diphosphate synthetase                      |     | 2.3 |
| MAL8P1.8                             | prolyl 4-hydroxylase alpha subunit 1                        |     | 2.0 |
| PF07_0059                            | 4-nitrophenylphosphatase                                    |     | 2.7 |
| PF07_0085                            | ferrodoxin reductase-like protein                           | 2.4 | 2.5 |

|           |                                                         |     |     |     |
|-----------|---------------------------------------------------------|-----|-----|-----|
| PF07_0098 | dynactin 4                                              |     |     | 2.2 |
| PF08_0071 | Fe-superoxide dismutase                                 | 2.7 |     |     |
| PF08_0131 | 1-cys peroxiredoxin                                     | 2.5 |     | 2.0 |
| PF08_0134 | conserved Plasmodium protein, unknown function          |     |     | 2.2 |
| PF10_0029 | conserved Plasmodium protein, unknown function          |     |     | 2.0 |
| PF10_0120 | ubiquinol-cytochrome c reductase complex subunit        | 2.4 |     |     |
| PF10_0150 | methionine aminopeptidase 1b                            | 2.1 |     |     |
| PF10_0155 | enolase                                                 |     |     | 2.7 |
| PF10_0210 | deoxyribose-phosphate aldolase                          |     |     | 2.1 |
| PF10_0211 | conserved Plasmodium membrane protein, unknown function |     | 2.2 |     |
| PF10_0225 | orotidine monophosphate decarboxylase                   |     |     | 2.1 |
| PF10_0245 | glucosamine-fructose-6-phosphate aminotransferase       |     | 2.5 |     |
| PF10_0275 | protoporphyrinogen oxidase                              | 2.1 |     |     |
| PF10_0336 | conserved Plasmodium protein, unknown function          | 2.7 | 2.2 | 3.1 |
| PF10_0379 | phospholipase                                           |     |     | 2.1 |
| PF11_0169 | SNO glutamine amidotransferase family protein           |     |     | 2.0 |
| PF11_0251 | endoplasmic reticulum oxidoreductin                     |     | 2.0 | 2.4 |
| PF11_0277 | conserved Plasmodium protein, unknown function          |     | 2.1 |     |
| PF11_0411 | carbonic anhydrase                                      |     |     | 2.4 |
| PF11_0436 | coproporphyrinogen III oxidase                          |     | 2.1 |     |
| PF11_0437 | 60S ribosomal protein L28                               |     |     | 2.1 |
| PF13_0122 | RRM containing cyclophilin                              |     |     | 2.2 |
| PF13_0142 | lsm6 homologue                                          |     |     | 2.0 |
| PF13_0144 | oxidoreductase                                          |     |     | 2.0 |
| PF13_0254 | conserved Plasmodium membrane protein, unknown function |     | 2.2 |     |
| PF13_0272 | thioredoxin-related protein                             |     | 2.0 |     |
| PF13_0273 | P-loop containing nucleoside triphosphate hydrolase     |     | 2.2 |     |
| PF13_0298 | conserved Plasmodium protein, unknown function          |     | 2.4 |     |
| PF13_0317 | conserved Plasmodium protein, unknown function          | 2.1 |     | 2.4 |
| PF14_0053 | ribonucleotide reductase small subunit                  | 2.2 |     |     |
| PF14_0088 | aldo-keto reductase                                     |     | 2.7 |     |
| PF14_0123 | conserved Plasmodium protein, unknown function          |     | 2.1 |     |
| PF14_0143 | atypical protein kinase, ABC-1 family                   |     | 2.5 |     |
| PF14_0145 | ubiquitin carboxyl-terminal hydrolase                   |     | 2.0 |     |
| PF14_0164 | NADP-specific glutamate dehydrogenase                   | 2.2 |     |     |
| PF14_0174 | pseudouridine synthase                                  |     | 2.1 |     |
| PF14_0187 | glutathione S-transferase                               | 3.0 | 2.1 | 2.2 |
| PF14_0192 | glutathione reductase                                   |     | 2.0 |     |
| PF14_0206 | conserved Plasmodium protein, unknown function          |     | 2.2 |     |
| PF14_0246 | phosphoenolpyruvate carboxylase                         |     | 2.1 |     |
| PF14_0286 | glutamate dehydrogenase                                 |     | 2.4 | 2.0 |
| PF14_0288 | cytochrome c oxidase subunit II precursor               | 2.2 |     |     |
| PF14_0326 | dynein-related AAA-type ATPase                          |     | 2.4 |     |
| PF14_0342 | conserved Plasmodium membrane protein, unknown function |     | 2.1 |     |
| PF14_0368 | thioredoxin peroxidase 1                                |     | 2.3 | 2.1 |
| PF14_0415 | dephospho-CoA kinase                                    | 2.0 |     |     |
| PF14_0484 | acetyl-CoA acetyltransferase                            |     |     | 2.2 |
| PF14_0545 | thioredoxin                                             |     | 2.0 | 2.2 |
| PF14_0572 | conserved Plasmodium membrane protein, unknown function | 2.4 |     |     |
| PF14_0590 | thioredoxin-like protein                                |     |     | 2.0 |
| PF14_0647 | conserved Plasmodium protein, unknown function          |     | 2.1 |     |
| PF14_0736 | Plasmodium exported protein, unknown function           |     | 2.0 |     |
| PF14_0741 | hypothetical protein                                    |     | 2.4 |     |



|            |                                                               |     |     |     |
|------------|---------------------------------------------------------------|-----|-----|-----|
| PF14_0761  | acyl-CoA synthetase                                           | 2.1 | 2.2 |     |
| PF14_0791  | dfg10 like protein                                            | 2.1 |     |     |
| PFA0355w   | carbon catabolite repressor protein 4                         |     |     | 2.2 |
| PFA0455c   | fatty acid elongation protein, GNS1/SUR4 family               |     |     | 2.4 |
| PFA0530c   | adenylate kinase                                              |     |     | 2.1 |
| PFB0135w   | conserved Plasmodium protein, unknown function                | 2.0 |     |     |
| PFB0225c   | conserved Plasmodium protein, unknown function                |     | 2.1 |     |
| PFB0279w   | conserved Plasmodium protein, unknown function                |     | 2.2 |     |
| PFB0280w   | conserved Plasmodium protein, unknown function                |     | 2.0 |     |
| PFB0510w   | GAF domain-related protein                                    |     | 2.4 |     |
| PFB0590w   | conserved Plasmodium protein, unknown function                | 2.0 |     |     |
| PFB0870w   | conserved Plasmodium protein, unknown function                |     | 2.1 |     |
| PFC0205c   | 1-cys-glutaredoxin-like protein-1                             |     | 2.0 |     |
| PFC0271c   | glutaredoxin 1                                                | 2.6 | 3.2 | 2.2 |
| PFC0275w   | FAD-dependent glycerol-3-phosphate dehydrogenase              |     | 2.1 |     |
| PFC0935c   | N-acetylglucosamine-1-phosphate transferase                   |     |     | 2.0 |
| PFD0150w   | conserved Plasmodium protein, unknown function                | 2.4 | 2.2 | 2.2 |
| PFD0207c   | conserved Plasmodium protein, unknown function                |     | 2.1 |     |
| PFD0320c   | conserved Plasmodium protein, unknown function                |     | 2.2 |     |
| PFD0660w   | phosphoglycerate mutase                                       | 2.7 |     |     |
| PFD0669c   | conserved Plasmodium protein, unknown function                |     |     | 2.1 |
| PFE0155w   | conserved Plasmodium protein, unknown function                |     | 2.2 |     |
| PFE0230w   | conserved Plasmodium protein, unknown function                |     | 2.0 |     |
| PFE0290c   | conserved Plasmodium protein, unknown function                |     |     | 2.2 |
| PFE0605c   | glutathione synthetase                                        | 2.3 | 3.0 | 2.1 |
| PFE0730c   | ribose 5-phosphate epimerase                                  |     |     | 2.1 |
| PFE1120w   | conserved Plasmodium protein, unknown function                |     | 2.2 |     |
| PFE1280w   | conserved Plasmodium protein, unknown function                |     |     | 2.2 |
| PFF0280w   | conserved Plasmodium protein, unknown function                | 2.4 | 2.1 | 2.7 |
| PFF0680c   | thiamin-phosphate pyrophosphorylase                           | 2.1 |     |     |
| PFF0683c   | conserved Plasmodium protein, unknown function                |     | 2.2 |     |
| PFF0770c   | conserved Plasmodium protein, unknown function                |     | 2.2 |     |
| PFF0900c   | rhomoid protease ROM10                                        | 2.0 |     |     |
| PFF0920c-a | conserved Plasmodium protein, unknown function                |     | 2.1 |     |
| PFF1130c   | superoxide dismutase                                          |     | 2.6 | 2.3 |
| PFF1270c   | conserved Plasmodium protein, unknown function                |     |     | 2.1 |
| PFF1335c   | 4-methyl-5(B-hydroxyethyl)-thiazol monophosphate biosynthesis |     |     | 2.0 |
| PFE0605c   | glutathione synthetase                                        | 2.3 | 3.0 | 2.1 |
| PFF1490w   | conserved Plasmodium protein, unknown function                |     |     | 2.4 |
| PFF1495w   | conserved Plasmodium protein, unknown function                | 2.2 |     |     |
| PFI0925w   | gamma-glutamylcysteine synthetase                             | 2.1 | 2.9 | 2.0 |
| PFI1050c   | Fe-S-cluster redox enzyme                                     |     |     | 2.1 |
| PFI1170c   | thioredoxin reductase                                         | 2.0 |     |     |
| PFI1250w   | thioredoxin-like protein 2                                    | 2.1 | 2.5 | 2.2 |
| PFI1420w   | guanylate kinase                                              |     |     | 2.1 |
| PFI1800w   | lysophospholipase                                             | 2.4 | 2.0 |     |
| PFL0230w   | cytidine/deoxycytidylate deaminase                            |     |     | 2.2 |
| PFL0365c   | conserved Plasmodium protein, unknown function                |     |     | 2.0 |
| PFL0595c   | glutathione peroxidase                                        | 3.7 |     |     |
| PFL0692c   | geranylgeranyltransferase type2 beta subunit                  |     |     | 2.3 |
| PFL0705c   | adrenodoxin-type ferredoxin                                   |     |     | 2.2 |
| PFL0720w   | conserved Plasmodium membrane protein, unknown function       |     |     | 2.0 |
| PFL0725w   | thioredoxin peroxidase 2                                      | 2.7 | 2.4 | 2.4 |

|             |                                                                  |     |     |     |
|-------------|------------------------------------------------------------------|-----|-----|-----|
| PFL1260w    | hydrolase/phosphatase                                            | 2.0 |     |     |
| PFL1650w    | conserved Plasmodium protein, unknown function                   |     | 2.1 |     |
| PFL1720w    | serine hydroxymethyltransferase                                  |     | 2.2 |     |
| PFL1920c    | hydroxyethylthiazole kinase                                      |     |     | 2.4 |
| PFL2510w    | chitinase                                                        |     |     | 2.0 |
| MAL8P1.134  | ferlin like protein                                              |     | 2.1 |     |
| PF11_0362   | protein phosphatase                                              |     | 2.2 |     |
| PFE0340c    | rhomboid protease ROM4                                           |     | 2.0 |     |
| PFF1365c    | HECT-domain (ubiquitin-transferase)                              |     | 2.0 |     |
| PF11370c    | phosphatidylserine decarboxylase                                 |     | 2.1 |     |
| PF11685w    | cAMP-dependent protein kinase catalytic subunit                  |     | 2.3 |     |
| PFL0300c    | protein phosphatase                                              |     | 2.0 |     |
| PFL1870c    | sphingomyelin phosphodiesterase                                  |     | 2.1 |     |
| PF13_0322   | falcilysin                                                       |     |     | 2.2 |
| PF14_0324   | Hsp70/Hsp90 organizing protein                                   |     |     | 2.1 |
| PFB0815w    | calcium dependent protein kinase 1                               | 2.1 | 2.5 |     |
| PF13_0066   | malonyl CoA-acyl carrier protein transacylase precursor          |     | 2.2 |     |
| PFL1700c    | V-type K -independent H -translocating inorganic pyrophosphatase |     | 2.2 |     |
| PF10950w    | protein disulfide isomerase                                      | 2.1 |     |     |
| PF13_0229   | aconitase                                                        |     | 2.2 |     |
| MAL7P1.19   | ubiquitin transferase                                            | 2.0 |     | 2.2 |
| MAL8P1.75   | ubiquitin-activating enzyme                                      |     | 2.2 |     |
| PF08_0020   | ubiquitination-mediated degradation component                    |     | 2.1 |     |
| PF11_0298   | GPI8p transamidase                                               |     | 2.0 |     |
| PFD0780w    | glutamyl-tRNA(Gln) amidotransferase subunit A                    |     | 2.0 |     |
| PFF1275c    | 3-oxoacyl-acyl-carrier protein synthase I/II                     |     | 2.1 |     |
| PFL2100w    | ubiquitin conjugating enzyme E2                                  | 2.2 |     | 2.2 |
| MAL13P1.114 | conserved Plasmodium protein, unknown function                   |     |     | 2.1 |
| MAL8P1.82   | vacuolar sorting protein VPS9                                    | 2.0 |     | 2.0 |
| PF13_0227   | vacuolar ATP synthase subunit d                                  | 2.4 |     |     |
| PF14_0541   | V-type H( )-translocating pyrophosphatase                        | 2.1 |     |     |

### Binding

|               |                                                                    |     |     |     |
|---------------|--------------------------------------------------------------------|-----|-----|-----|
| PFF0595c      | leucine-rich repeat protein                                        |     |     | 2.1 |
| MAL13P1.163-a | ER lumen protein retaining receptor 1                              |     | 2.2 |     |
| MAL13P1.238   | leucine-rich repeat protein                                        |     | 2.0 |     |
| MAL8P1.101    | RNA binding protein                                                | 2.2 |     |     |
| PF07_0017     | phosphoinositide-binding protein                                   | 2.8 |     |     |
| PF08_0086     | RNA binding protein                                                | 2.0 |     |     |
| PF10_0015     | acyl-CoA binding protein, isoform 1, ACBP1                         |     | 2.2 | 2.1 |
| PF10_0047     | RNA binding protein                                                | 2.2 |     |     |
| PF10_0146     | conserved Plasmodium protein, unknown function                     |     | 2.1 | 2.5 |
| PF11_0086     | MIF4G domain containing protein                                    | 2.1 |     |     |
| PF11_0249     | conserved Plasmodium protein, unknown function                     |     |     | 2.0 |
| PF13_0257     | glutamate--tRNA ligase                                             | 2.1 |     |     |
| PF14_0056     | RNA binding protein                                                | 2.0 |     |     |
| PF14_0061     | PPR repeat protein                                                 |     | 2.1 |     |
| PF14_0201     | surface protein, Pf113                                             | 2.0 |     |     |
| PFC0760c      | conserved Plasmodium protein, unknown function                     |     |     | 2.2 |
| PFD0110w      | normocyte binding protein 1,reticulocyte binding protein homologue |     |     | 2.1 |
| PFD0295c      | apical sushi protein                                               |     | 2.4 | 2.1 |
| PFD0535w      | conserved Plasmodium protein, unknown function                     |     |     | 2.0 |
| PFD1150c      | reticulocyte binding protein homologue 4                           |     |     | 2.2 |
| PFL1930w      | conserved Plasmodium protein, unknown function                     |     |     | 2.1 |

|             |                                                              |     |     |     |
|-------------|--------------------------------------------------------------|-----|-----|-----|
| PFL2520w    | reticulocyte binding protein homologue 3, pseudogene         |     |     | 2.0 |
| MAL13P1.130 | glideosome associated protein with multiple membrane spans 1 |     | 2.4 |     |
| PF11_0429   | conserved Plasmodium protein, unknown function               |     | 2.1 |     |
| PFC0110w    | cytoadherence linked asexual protein 3.2                     |     | 2.0 |     |
| PFC1045c    | conserved Plasmodium protein, unknown function               |     | 2.1 |     |
| PFI1730w    | cytoadherence linked asexual protein 9                       |     | 2.0 |     |
| MAL13P1.176 | reticulocyte binding protein 2 homologue b                   |     |     | 2.3 |
| PF11_0402   | conserved Plasmodium protein, unknown function               |     |     | 2.1 |
| PFC0515c    | TPR domain containing protein                                |     |     | 2.0 |
| PFC0345w    | conserved Plasmodium protein, unknown function               | 5.4 | 2.0 | 2.1 |
| PFF0400w    | conserved Plasmodium protein, unknown function               |     |     | 2.1 |
| PFC0441c-a  | SAC3/GNAP family-related protein                             |     | 2.0 |     |
| MAL7P1.142  | conserved Plasmodium membrane protein, unknown function      | 2.2 |     |     |
| PFD0255w    | ag-1 blood stage membrane protein homologue                  |     | 2.1 | 2.4 |
| PFF1000w    | cleavage stimulation factor subunit 1-like protein           |     | 2.0 | 2.1 |

---

**Unknown function**

---

|              |                                                         |     |     |     |
|--------------|---------------------------------------------------------|-----|-----|-----|
| PF14_0463    | chloroquine resistance marker protein                   |     | 2.1 | 2.0 |
| MAL13P1.189  | conserved Plasmodium membrane protein, unknown function |     | 2.0 |     |
| MAL13P1.237a | conserved Plasmodium protein, unknown function          |     | 2.1 |     |
| MAL13P1.262  | conserved Plasmodium protein, unknown function          |     |     | 2.2 |
| PF08_0082    | conserved Plasmodium protein, unknown function          |     |     | 2.1 |
| PF10_0070a   | conserved Plasmodium protein, unknown function          |     | 2.2 |     |
| PF11_0049    | NOT family protein                                      |     |     | 2.0 |
| PF11_0342    | conserved Plasmodium protein, unknown function          |     |     | 2.1 |
| PF11_0392    | conserved Plasmodium protein, unknown function          |     |     | 2.2 |
| PF11_0439    | conserved protein, unknown function                     | 2.2 |     |     |
| PF13_0162    | conserved Plasmodium protein, unknown function          | 2.1 |     |     |
| PF14_0093    | conserved Plasmodium protein, unknown function          |     |     | 3.1 |
| PF14_0184    | conserved Plasmodium protein, unknown function          |     |     | 2.0 |
| PF14_0217    | conserved Plasmodium protein, unknown function          |     |     | 2.0 |
| PF14_0355    | conserved Plasmodium membrane protein, unknown function |     | 2.1 |     |
| PF14_0442    | conserved Plasmodium protein, unknown function          |     |     | 2.2 |
| PF14_0461    | conserved Plasmodium protein, unknown function          |     |     | 2.1 |
| PF14_0726    | conserved Plasmodium protein, unknown function          |     |     | 2.0 |
| PF14_0762    | Plasmodium exported protein, unknown function           |     |     | 2.2 |
| PFA0205w     | conserved Plasmodium membrane protein, unknown function |     | 2.1 |     |
| PFA0270c     | conserved Plasmodium protein, unknown function          |     | 2.1 |     |
| PFB0145c     | conserved Plasmodium protein, unknown function          |     |     | 2.0 |
| PFB0423c     | conserved protein, unknown function                     |     | 2.2 |     |
| PFB0765w     | conserved Plasmodium protein, unknown function          |     |     | 2.0 |
| PFC0265c     | conserved Plasmodium protein, unknown function          | 2.1 |     |     |
| PFD0925w     | conserved Plasmodium protein, unknown function          |     | 2.2 |     |
| PFE1555c     | conserved Plasmodium protein, unknown function          |     |     | 2.3 |
| PFF0545c     | conserved Plasmodium protein, unknown function          |     | 2.0 |     |
| PFF0810c     | conserved Plasmodium protein, unknown function          |     | 2.1 |     |
| PFF1090c     | conserved Plasmodium membrane protein, unknown function |     | 2.1 |     |
| PFI0495w     | conserved Plasmodium protein, unknown function          |     |     | 2.3 |
| PFI0845w     | conserved Plasmodium membrane protein, unknown function |     | 2.1 |     |
| PFI0850w     | conserved Plasmodium protein, unknown function          |     |     | 2.3 |
| PFI1210w     | conserved Plasmodium protein, unknown function          |     |     | 2.2 |
| PFI1385c     | conserved Plasmodium protein, unknown function          |     | 2.2 |     |
| PFL1000c     | conserved Plasmodium protein, unknown function          |     |     | 2.2 |
| PFL1060c     | conserved protein, unknown function                     |     | 2.1 |     |

|             |                                                         |     |     |     |
|-------------|---------------------------------------------------------|-----|-----|-----|
| PFL1130c    | conserved Plasmodium protein, unknown function          |     |     | 2.0 |
| PFL1530w    | asparagine-rich protein                                 | 2.2 |     |     |
| PFL1835w    | conserved Plasmodium protein, unknown function          | 2.2 |     |     |
| PFL1840w    | conserved Plasmodium membrane protein, unknown function |     | 2.2 |     |
| PFL2335w    | conserved Plasmodium protein, unknown function          |     |     | 2.5 |
| PFL2575c    | Plasmodium exported protein, unknown function           |     |     | 2.1 |
| MAL13P1.315 | conserved Plasmodium protein, unknown function          |     | 2.0 |     |
| PFL0260c    | conserved Plasmodium protein, unknown function          |     | 2.1 |     |
| PFL1025c    | conserved Plasmodium protein, unknown function          |     | 2.2 |     |
| PFL2505c    | conserved Plasmodium protein, unknown function          |     | 2.1 |     |
| PF13_0155   | conserved Plasmodium protein, unknown function          |     |     | 2.3 |
| PF13_0200   | conserved Plasmodium protein, unknown function          |     |     | 2.1 |
| PF14_0229   | conserved Plasmodium protein, unknown function          |     |     | 2.0 |
| PF14_0380   | conserved Plasmodium protein, unknown function          |     |     | 2.1 |
| PF14_0482   | conserved Plasmodium protein, unknown function          |     |     | 2.2 |
| PF14_0686   | conserved Plasmodium protein, unknown function          |     |     | 2.0 |
| PFI0710c    | conserved Plasmodium protein, unknown function          |     |     | 2.4 |
| MAL7P1.146  | conserved Plasmodium membrane protein, unknown function |     | 2.2 | 2.1 |
| PF13_0335   | conserved Plasmodium protein, unknown function          |     | 2.0 |     |
| PFF1475c    | conserved Plasmodium protein, unknown function          |     | 2.1 |     |
| PF10_0189   | conserved Plasmodium protein, unknown function          |     |     | 2.0 |
| PF10_0331a  | conserved Plasmodium protein, unknown function          | 2.7 | 2.1 | 2.8 |
| PF13_0072   | conserved Plasmodium protein, unknown function          |     |     | 2.1 |

#### Down

| <b>Transport</b>                     |                                                              |      |      |      |
|--------------------------------------|--------------------------------------------------------------|------|------|------|
| PFD1110w                             | glideosome associated protein with multiple membrane spans 2 |      | -2.2 |      |
| MAL13P1.188                          | conserved Plasmodium protein, unknown function               |      |      | -2.1 |
| PFF0335c                             | probable protein, unknown function                           |      | -2.5 |      |
| PFF1345w                             | transportin                                                  |      | -2.1 | -2.1 |
| PFL0890c                             | triose or hexose phosphate/phosphate translocator            |      | -2.0 |      |
| MAL13P1.137                          | conserved Plasmodium protein, unknown function               | -2.3 |      | -2.1 |
| PF08_0093                            | mitochondrial carrier protein                                |      | -2.1 |      |
| PF14_0344                            | translocon component PTEX150                                 | -2.1 |      |      |
| PF11_0340                            | conserved Plasmodium protein, unknown function               | -2.3 |      | -2.1 |
| MAL13P1.206                          | sodium-dependent phosphate transporter                       | -2.4 |      |      |
| MAL13P1.37                           | conserved Plasmodium protein, unknown function               |      | -2.1 |      |
| MAL7P1.167                           | conserved Plasmodium protein, unknown function               |      |      | -2.7 |
| PF10_0360                            | acetyl-CoA transporter                                       |      | -2.0 |      |
| PF11_0172                            | folate/biopterin transporter                                 | -2.6 |      |      |
| PF11_0287                            | CRAL/TRIO domain-containing protein                          | -2.1 |      |      |
| PF11_0338                            | aquaglyceroporin                                             |      |      | -2.0 |
| PF14_0369                            | copper transporter putative                                  |      | -2.4 |      |
| PF14_0662                            | nucleoside transporter                                       |      | -2.1 |      |
| PFB0435c                             | transporter                                                  |      | -2.0 |      |
| PFD0210c                             | 6-cysteine protein                                           |      | -2.2 |      |
| PFF1430c                             | amino acid transporter                                       | -2.2 |      |      |
| PFI0785c                             | sugar transporter                                            |      | -2.0 |      |
| PFL1410c                             | ABC transporter, (CT family)                                 | -2.7 | -2.4 | -2.1 |
| <b>Translation and transcription</b> |                                                              |      |      |      |
| MAL13P1.336                          | conserved Plasmodium protein, unknown function               |      | -2.2 | -2.7 |
| MAL7P1.17                            | conserved Plasmodium membrane protein, unknown function      |      | -2.0 | -2.4 |
| PF08_0127                            | conserved Plasmodium protein, unknown function               |      |      | -2.4 |

|           |                                                                  |      |      |
|-----------|------------------------------------------------------------------|------|------|
| MAL8P1.56 | conserved Plasmodium membrane protein, unknown function          | -2.1 |      |
| MAL8P1.84 | conserved Plasmodium protein, unknown function                   | -2.0 |      |
| PF07_0012 | conserved Plasmodium protein, unknown function                   |      | -2.2 |
| PF07_0053 | conserved Plasmodium protein, unknown function                   |      | -2.0 |
| PF07_0058 | conserved Plasmodium protein, unknown function                   |      | -2.1 |
| PF10_0085 | small subunit rRNA processing protein                            | -2.1 |      |
| PF10_0272 | 60S ribosomal protein L3                                         | -2.0 |      |
| PF08_0034 | histone acetyltransferase GCN5                                   |      | -2.4 |
| PF10_0078 | histone deacetylase                                              |      | -2.1 |
| PF10_0143 | transcriptional coactivator ADA2                                 | -2.4 | -2.0 |
| PF10_0295 | conserved Plasmodium protein, unknown function                   | -2.2 |      |
| PF10_0296 | conserved Plasmodium protein, unknown function                   |      | -2.1 |
| PF11_0204 | conserved Plasmodium protein, unknown function                   | -2.0 | -2.9 |
| PF13_0086 | conserved Plasmodium protein, unknown function                   |      | -2.2 |
| PF13_0148 | conserved Plasmodium protein, unknown function                   |      | -2.4 |
| PF14_0059 | conserved Plasmodium protein, unknown function                   |      | -2.0 |
| PF14_0406 | conserved Plasmodium protein, unknown function                   |      | -2.4 |
| PFA0525w  | transcription initiation factor TFIIIB                           | -2.2 |      |
| PFB0550w  | peptide chain release factor subunit 1                           | -2.0 |      |
| PFB0730w  | DEAD/DEAH box helicase                                           |      | -2.2 |
| PFD0385w  | conserved Plasmodium protein, unknown function                   | -2.1 |      |
| PFD0940w  | conserved Plasmodium protein, unknown function                   |      | -2.1 |
| PFD1100c  | conserved Plasmodium protein, unknown function                   |      | -2.2 |
| PFE0840c  | transcription factor with AP2 domain(s)                          |      | -2.1 |
| PFF0185c  | conserved Plasmodium protein, unknown function                   | -2.3 |      |
| PFF0200c  | transcription factor with AP2 domain(s),SPE2-interacting protein | -2.8 | -2.1 |
| PFF0505c  | conserved Plasmodium protein, unknown function                   |      | -2.1 |
| PFF0670w  | transcription factor with AP2 domain(s)                          | -2.0 | -2.4 |
| PFF0930w  | conserved Plasmodium protein, unknown function                   |      | -2.0 |
| PFI0160w  | conserved Plasmodium membrane protein, unknown function          |      | -2.1 |
| PFL0625c  | eukaryotic translation initiation factor 3 subunit 10            |      | -2.0 |
| PFL1180w  | chromatin assembly protein (ASF1)                                |      | -2.2 |
| PFL1645w  | conserved Plasmodium protein, unknown function                   |      | -2.1 |

---

### Structure

---

|            |                                                              |      |      |
|------------|--------------------------------------------------------------|------|------|
| PFE1545c   | formin 1                                                     | -2.1 | -2.5 |
| PFA0295c   | conserved Plasmodium protein, unknown function               | -2.1 |      |
| MAL8P1.146 | filament assembling protein                                  | -2.4 | -2.1 |
| PF10_0190  | conserved Plasmodium protein, unknown function               |      | -2.0 |
| PF11_0267  | kelch protein                                                | -2.4 |      |
| PF11_0268  | kelch protein                                                | -2.1 |      |
| PF14_0222  | ankyrin                                                      |      | -2.1 |
| PFB0935w   | cytoadherence linked asexual protein 2                       |      | -2.2 |
| PFC0185w   | membrane skeletal protein IMC1-related                       | -2.1 |      |
| PFE1285w   | membrane skeletal protein IMC1-related                       |      | -2.4 |
| PFF0330w   | coatamer alpha subunit                                       | -2.0 | -2.8 |
| PFF0870w   | conserved Plasmodium membrane protein, unknown function      |      | -2.5 |
| PFI0265c   | high molecular weight rhostry protein 3                      |      | -2.1 |
| PF14_0065  | glideosome associated protein with multiple membrane spans 3 | -2.2 |      |

---

### Signal transduction

---

|             |                                                |  |      |
|-------------|------------------------------------------------|--|------|
| MAL13P1.297 | ADP-ribosylation factor                        |  | -2.5 |
| PF07_0019   | conserved Plasmodium protein, unknown function |  | -2.0 |
| MAL13P1.295 | conserved Plasmodium protein, unknown function |  | -2.1 |
| MAL7P1.102  | conserved Plasmodium protein, unknown function |  | -2.0 |

|            |                                                |      |      |
|------------|------------------------------------------------|------|------|
| MAL7P1.123 | conserved Plasmodium protein, unknown function | -2.1 |      |
| PF10_0133  | conserved Plasmodium protein, unknown function |      | -2.2 |
| PF10_0161a | Plasmodium exported protein, unknown function  | -2.0 |      |
| PF11_0220  | protein kinase                                 | -2.3 | -2.1 |
| PF11_0227  | serine/threonine protein kinase                |      | -2.0 |
| PF14_0361  | secretory complex protein 62                   |      | -2.2 |
| PF14_0476  | serine/threonine protein kinase                | -2.1 |      |
| PFA0130c   | serine/threonine protein kinase, FIKK family   | -2.2 |      |
| PFC0945w   | protein kinase                                 |      | -2.1 |
| PFF0750w   | cdc2-related protein kinase 5                  |      | -2.2 |
| PFI0100c   | serine/threonine protein kinase, FIKK family   | -2.0 | -2.2 |
| PFL2280w   | serine/threonine protein kinase                |      | -2.0 |

---

**Pathogenesis**

---

|            |                                                                  |      |      |
|------------|------------------------------------------------------------------|------|------|
| PFC0640w   | CSP and TRAP-related protein                                     | -2.2 | -2.9 |
| PFB0330c   | serine repeat antigen 7                                          |      | -2.1 |
| PFB0340c   | serine repeat antigen 5                                          |      | -2.2 |
| PFB0345c   | serine repeat antigen 4                                          |      | -2.0 |
| PFB0350c   | serine repeat antigen 3                                          |      | -2.0 |
| PFI1755c   | ring-exported protein 3                                          | -2.8 |      |
| MAL13P1.58 | Plasmodium exported protein (PHISTa-like), unknown function      | -2.0 |      |
| MAL7P1.58  | Pfmc-2TM Maurer's cleft two transmembrane protein                |      | -2.2 |
| MAL8P1.208 | rifin                                                            |      | -2.1 |
| PF08_0102  | asparagine-rich antigen Pfa55-14                                 |      | -2.0 |
| PF10_0115  | QF122 antigen                                                    |      | -2.5 |
| PF14_0018  | Plasmodium exported protein (PHISTb), unknown function           |      | -2.1 |
| PF14_0732  | Plasmodium exported protein (PHISTb), unknown function           | -3.2 | -2.0 |
| PF14_0753  | Plasmodium exported protein (hyp13), unknown function            |      | -2.1 |
| PFA0020w   | rifin                                                            |      | -2.0 |
| PFA0065w   | Pfmc-2TM Maurer's cleft two transmembrane protein                |      | -2.1 |
| PFA0700c   | Plasmodium exported protein (hyp10), unknown function            |      | -2.0 |
| PFB0080c   | Plasmodium exported protein (PHISTb), unknown function           |      | -5.1 |
| PFC0045w   | rifin                                                            |      | -2.4 |
| PFC1080c   | Pfmc-2TM Maurer's cleft two transmembrane protein                |      | -2.2 |
| PFD0015c   | rifin                                                            |      | -2.0 |
| PFD0060w   | rifin                                                            |      | -2.4 |
| PFD0090c   | Plasmodium exported protein (PHISTa), unknown function           |      | -2.4 |
| PFD0625c   | erythrocyte membrane protein 1, PfEMP1                           | -2.4 |      |
| PFD1240w   | rifin                                                            |      | -2.1 |
| PFE0040c   | mature parasite-infected erythrocyte surface antigen,erythrocyte |      | -2.1 |
| PFE0060w   | parasite-infected erythrocyte surface protein                    | -2.4 |      |
| PFF0060w   | Pfmc-2TM Maurer's cleft two transmembrane protein                |      | -2.0 |
| PFF0850c   | stevor                                                           |      | -2.4 |
| PFF0855c   | rifin                                                            | -2.1 | -2.4 |
| PFF1575w   | rifin                                                            |      | -2.0 |
| PFI0010c   | rifin                                                            |      | -2.7 |
| PFI0030c   | rifin                                                            | -2.0 | -2.9 |
| PFI1805w   | rifin                                                            |      | -9.1 |
| PFC0080c   | Plasmodium exported protein (hyp1), unknown function             | -2.3 |      |

---

**Motor activity**

---

|             |                                                |      |      |
|-------------|------------------------------------------------|------|------|
| PF10_0037   | conserved Plasmodium protein, unknown function |      | -2.1 |
| MAL13P1.140 | conserved Plasmodium protein, unknown function |      | -2.4 |
| PF11_0193   | conserved Plasmodium protein, unknown function | -2.3 |      |
| PF11_0241   | conserved Plasmodium protein, unknown function |      | -2.2 |

|            |                                          |      |      |
|------------|------------------------------------------|------|------|
| PFC0860w   | kinesin                                  |      | -2.1 |
| PF11_0114  | actin-like protein homolog, ALP1 homolog |      | -2.1 |
| PFL2225w   | myosin A tail domain interacting protein | -2.0 |      |
| PFL2460w   | coronin                                  |      | -2.5 |
| PF14_0243a | dynein-associated protein                |      | -2.1 |

---

#### DNA replication and repairing

---

|           |                                                  |      |      |
|-----------|--------------------------------------------------|------|------|
| PFE1345c  | minichromosome maintenance (MCM) complex subunit | -2.2 | -2.0 |
| PF11_0383 | conserved Plasmodium protein, unknown function   |      | -2.0 |
| PF14_0316 | DNA topoisomerase II                             | -2.2 |      |
| PF14_0527 | conserved Plasmodium protein, unknown function   | -2.1 | -2.4 |
| PFA0545c  | replication factor c protein                     |      | -2.0 |
| PFD0790c  | DNA replication licensing factor                 |      | -2.3 |
| PFE0520c  | topoisomerase I                                  |      | -2.3 |
| PFF1225c  | DNA polymerase 1                                 |      | -2.0 |
| PFL0580w  | minichromosome maintenance (MCM) complex subunit |      | -2.1 |
| PF13_0095 | minichromosome maintenance (MCM) complex subunit |      | -2.1 |

---

#### Chaperone

---

|             |                                |      |      |
|-------------|--------------------------------|------|------|
| PFC0285c    | T-complex protein beta subunit | -2.6 |      |
| PF08_0032   | DnaJ protein                   | -2.1 | -2.5 |
| PF08_0054   | heat shock protein 70          | -2.2 |      |
| PF11_0175   | heat shock protein 101         | -2.1 |      |
| PF14_0013   | DnaJ protein                   | -2.0 |      |
| PFC0350c    | TCP-1/cpn60 Chaperonein family | -2.1 |      |
| PFF0615c    | 6-cysteine protein             |      | -2.2 |
| PFI0875w    | heat shock protein 70          | -2.0 | -2.1 |
| PF11580c    | DHHC-type zinc finger protein  |      | -2.2 |
| MAL13P1.540 | heat shock protein 70          | -2.3 | -2.1 |
| PFE0895c    | zinc finger protein            |      | -2.2 |

---

#### Cell cycle and invasion

---

|           |                                                |      |      |
|-----------|------------------------------------------------|------|------|
| PF10_0344 | glutamate-rich protein                         | -2.0 | -2.2 |
| PF10_0352 | merozoite surface protein                      |      | -2.1 |
| PF13_0197 | merozoite surface protein 7 precursor          | -2.1 |      |
| PF13_0338 | cysteine-rich surface protein                  | -2.0 |      |
| PFC0120w  | cytoadherence linked asexual protein 3.1       | -2.0 |      |
| PF10_0347 | merozoite surface protein                      | -2.1 |      |
| PF14_0538 | conserved Plasmodium protein, unknown function |      | -2.0 |
| PFE1415w  | cell cycle regulator with zn-finger domain     | -2.1 |      |
| PFC0435w  | parasite-infected erythrocyte surface protein  |      | -2.0 |
| PF13_0193 | MSP7-like protein                              | -2.3 | -2.0 |
| PF14_0495 | roptry neck protein 2                          |      | -2.2 |
| PFE0075c  | roptry-associated protein 3                    | -2.1 |      |
| PFB0680w  | roptry neck protein 6                          | -2.0 |      |
| PFD0955w  | apical merozoite protein                       | -2.1 |      |
| PF11445w  | high molecular weight roptry protein 2         | -2.4 |      |

---

#### Catalytic/Metabolic activity

---

|             |                                                         |      |      |
|-------------|---------------------------------------------------------|------|------|
| MAL13P1.118 | 3',5'-cyclic nucleotide phosphodiesterase               |      | -2.4 |
| MAL13P1.344 | RNAse L inhibitor protein                               | -2.1 |      |
| MAL13P1.38  | conserved Plasmodium membrane protein, unknown function |      | -2.0 |
| MAL13P1.56  | M1-family alanyl aminopeptidase                         | -2.4 |      |
| MAL8P1.109  | protein phosphatase                                     |      | -2.1 |
| MAL8P1.144  | AAA family ATPase                                       | -2.4 |      |
| MAL8P1.16   | rhomboid protease ROM3                                  |      | -2.0 |
| PF07_0024   | inositol phosphatase                                    | -2.4 | -2.1 |

|             |                                                         |      |      |      |
|-------------|---------------------------------------------------------|------|------|------|
| PF08_0108   | plasmepsin X                                            | -2.2 | -2.5 |      |
| PF10_0020   | alpha/beta hydrolase                                    |      | -2.5 |      |
| PF10_0071   | rhoGAP GTPase                                           |      | -2.1 |      |
| PF10_0094   | tubulin-tyrosine ligase                                 |      | -2.4 |      |
| PF10_0220   | phospholipid scramblase 1                               |      | -2.1 |      |
| PF11_0122   | endonuclease/exonuclease/phosphatase family protein     |      | -2.0 |      |
| PF11_0164   | peptidyl-prolyl cis-trans isomerase,cyclophilin         |      | -2.0 |      |
| PF11_0167   | conserved Plasmodium membrane protein, unknown function |      |      | -2.0 |
| PF11_0222   | WD domain, G-beta repeat-containing protein             |      | -2.1 |      |
| PF11_0257   | ethanolamine kinase                                     |      | -2.0 |      |
| PF11_0300   | conserved Plasmodium protein, unknown function          |      | -2.0 |      |
| PF11_0395   | guanylyl cyclase                                        |      | -2.1 |      |
| PF11_0452   | conserved Plasmodium protein, unknown function          | -2.1 |      |      |
| PF13_0063   | 26S proteasome regulatory subunit 7                     |      | -2.0 |      |
| PF14_0015   | aminopeptidase                                          | -2.0 |      |      |
| PF14_0017   | lysophospholipase                                       | -2.1 |      |      |
| PF14_0025   | proteosome subunit                                      |      | -2.3 |      |
| PF14_0076   | plasmepsin I                                            | -2.0 |      |      |
| PF14_0281   | plasmepsin IX                                           |      | -2.1 |      |
| PF14_0346   | cGMP-dependent protein kinase                           | -2.1 | -2.0 |      |
| PF14_0352   | ribonucleoside-diphosphate reductase, large subunit     | -2.0 | -2.0 | -2.4 |
| PF14_0373   | ubiquinol-cytochrome c reductase iron-sulfur subunit    |      |      | -2.1 |
| PF14_0439   | M17 leucyl aminopeptidase                               | -2.0 |      |      |
| PF14_0660   | protein phosphatase                                     |      | -2.1 |      |
| PFA0220w    | ubiquitin carboxyl-terminal hydrolase                   | -2.0 |      |      |
| PFB0515w    | dolichol-linked oligosaccharide biosynthesis enzyme     |      | -2.0 |      |
| PFC0065c    | alpha/beta hydrolase                                    | -2.1 |      |      |
| PFD0230c    | dipeptidyl peptidase 3                                  |      |      | -2.4 |
| PFE0355c    | subtilisin-like protease 3                              |      | -2.0 |      |
| PFE0555w    | stearoyl-CoA delta 9 desaturase                         |      | -2.1 |      |
| PFE0585c    | myo-inositol 1-phosphate synthase                       | -2.0 | -2.0 | -2.4 |
| PFE0875c    | conserved Plasmodium protein, unknown function          | -2.1 | -2.0 | -2.5 |
| PFF0745c    | ribonuclease                                            |      |      | -2.1 |
| PFF1210w    | phosphatidic acid phosphatase                           |      |      | -2.1 |
| PFF1350c    | acetyl-CoA synthetase                                   | -2.0 |      |      |
| PFI0320w    | arginase                                                | -2.0 |      |      |
| PFI0755c    | 6-phosphofructokinase                                   | -2.1 |      |      |
| PFI0920c    | dihydrouridine synthase                                 | -2.2 |      |      |
| PFI1090w    | S-adenosylmethionine synthetase                         |      | -2.1 |      |
| PFI1180w    | patatin-like phospholipase                              | -2.0 |      |      |
| PFI1340w    | fumarate hydratase                                      |      |      | -2.0 |
| PFI1775w    | lysophospholipase                                       | -2.1 |      |      |
| PFL0035c    | acyl-CoA synthetase, PfACS7                             | -2.0 |      |      |
| PFL0590c    | non-SERCA-type Ca2 -transporting P-ATPase               | -2.0 |      |      |
| PFL0620c    | glycerol-3-phosphate acyltransferase                    |      | -2.1 |      |
| PFL1110c    | cAMP-dependent protein kinase regulatory subunit        |      | -2.2 |      |
| PFL1565c    | CG2-related protein                                     |      | -2.2 |      |
| PFL1885c    | protein kinase 2                                        | -2.1 |      |      |
| PFL1890c    | HD superfamily phosphohydrolase protein                 | -2.0 |      |      |
| PF08_0007   | conserved Plasmodium protein, unknown function          |      |      | -2.2 |
| MAL8P1.91   | phospholipase DDHD1                                     |      | -2.1 |      |
| MAL13P1.205 | Rab GTPase 11b                                          |      | -2.0 |      |
| PF10_0330   | ubiquitin conjugating enzyme                            |      | -2.0 |      |



|           |                                         |      |      |
|-----------|-----------------------------------------|------|------|
| PF13_0301 | ubiquitin conjugating enzyme            |      | -2.7 |
| PFC0160w  | palmitoyl transferase                   |      | -2.0 |
| PFE0815w  | tRNA pseudouridine synthase             | -2.2 |      |
| PFB0585w  | Leu/Phe-tRNA protein transferase        |      | -2.3 |
| PFC0840w  | P-type ATPase                           |      | -2.1 |
| PFL2060c  | rab specific GDP dissociation inhibitor |      | -2.2 |

---

#### Binding

---

|             |                                                          |      |      |
|-------------|----------------------------------------------------------|------|------|
| MAL13P1.287 | conserved Plasmodium protein, unknown function           | -2.1 | -2.0 |
| MAL7P1.108  | phosphoinositide-binding protein                         |      | -2.1 |
| MAL7P1.229  | cytoadherence linked asexual protein                     |      | -2.0 |
| MAL8P1.11   | conserved Plasmodium membrane protein, unknown function  | -2.1 | -2.0 |
| PF08_0136b  | von Willebrand factor A-domain related protein           |      | -2.0 |
| PF10_0348   | duffy binding-like merozoite surface protein             | -2.1 | -2.5 |
| PF10_0351   | probable protein, unknown function                       |      | -2.4 |
| PF11_0243   | leucine-rich repeat protein                              |      | -2.0 |
| PF13_0249   | conserved Plasmodium protein, unknown function           |      | -2.0 |
| PF14_0249   | conserved Plasmodium protein, unknown function           |      | -2.1 |
| PF14_0293   | conserved Plasmodium protein, unknown function           | -2.1 | -2.0 |
| PF14_0315   | conserved Plasmodium membrane protein, unknown function  |      | -2.3 |
| PF14_0383   | conserved Plasmodium protein, unknown function           |      | -2.2 |
| PF14_0433   | erythrocyte membrane-like protein                        |      | -2.0 |
| PF14_0652   | conserved Plasmodium protein, unknown function           | -2.1 | -2.0 |
| PFA0165c    | conserved Plasmodium protein, unknown function           |      | -2.3 |
| PFB0125c    | conserved Plasmodium protein, unknown function           | -2.1 | -2.0 |
| PFB0190c    | conserved Plasmodium protein, unknown function           |      | -2.1 |
| PFB0195c    | conserved Plasmodium protein, unknown function           |      | -2.0 |
| PFC1060c    | conserved Plasmodium protein, unknown function           |      | -2.1 |
| PFE0750c    | RNA recognition motif                                    |      | -2.2 |
| PFL1170w    | polyadenylate-binding protein                            |      | -2.0 |
| PF07_0021   | conserved Plasmodium protein, unknown function           | -2.0 | -2.1 |
| PF10_0342   | probable protein, unknown function                       |      | -2.0 |
| PFE1410c    | conserved Plasmodium protein, unknown function           |      | -2.4 |
| PF14_0159   | root hair defective 3 GTP-binding protein (RHD3) homolog | -2.0 |      |
| PFE1485w    | conserved Plasmodium protein, unknown function           |      | -2.2 |
| PF13_0261   | nucleolar preribosomal associated cytoplasmic ATPase     | -2.3 |      |

---

#### Unknown function

---

|            |                                                         |      |      |
|------------|---------------------------------------------------------|------|------|
| MAL7P1.129 | conserved Plasmodium protein, unknown function          |      | -2.0 |
| MAL7P1.231 | histidine-rich protein II                               |      | -2.1 |
| MAL8P1.135 | conserved Plasmodium membrane protein, unknown function | -2.0 |      |
| MAL8P1.29  | conserved Plasmodium protein, unknown function          |      | -2.0 |
| MAL8P1.30  | conserved Plasmodium membrane protein, unknown function | -2.1 | -2.0 |
| PF07_0016  | conserved Plasmodium membrane protein, unknown function |      | -2.1 |
| PF07_0107  | Plasmodium exported protein, unknown function           | -2.1 |      |
| PF08_0005  | conserved Plasmodium protein, unknown function          | -2.0 |      |
| PF08_0058  | conserved Plasmodium protein, unknown function          |      | -2.1 |
| PF08_0090  | conserved Plasmodium protein, unknown function          | -2.1 |      |
| PF10_0031  | conserved Plasmodium protein, unknown function          | -2.2 | -2.0 |
| PF10_0034  | conserved Plasmodium protein, unknown function          | -2.1 |      |
| PF10_0059  | conserved Plasmodium membrane protein, unknown function |      | -2.0 |
| PF10_0119  | conserved Plasmodium protein, unknown function          | -2.1 | -2.4 |
| PF10_0135  | conserved Plasmodium protein, unknown function          |      | -2.0 |
| PF10_0140  | conserved protein, unknown function                     |      | -2.1 |
| PF10_0254  | conserved Plasmodium protein, unknown function          | -2.4 |      |

|            |                                                         |      |      |
|------------|---------------------------------------------------------|------|------|
| PF10_0283  | conserved Plasmodium protein, unknown function          | -2.1 | -2.1 |
| PF10_0292  | conserved Plasmodium protein, unknown function          |      | -2.0 |
| PF11_0238  | conserved Plasmodium protein, unknown function          |      | -2.2 |
| PF11_0304  | conserved Plasmodium protein, unknown function          |      | -2.0 |
| PF11_0343  | conserved Plasmodium protein, unknown function          |      | -2.0 |
| PF11_0354  | conserved Plasmodium protein, unknown function          |      | -2.1 |
| PF11_0373  | conserved Plasmodium protein, unknown function          |      | -2.3 |
| PF11_0433  | conserved Plasmodium protein, unknown function          |      | -2.0 |
| PF13_0250  | G-beta repeat protein                                   | -2.1 |      |
| PF13_0277  | conserved Plasmodium protein, unknown function          |      | -2.2 |
| PF13_0290  | conserved Plasmodium protein, unknown function          |      | -2.0 |
| PF14_0106  | ankyrin-repeat protein                                  | -2.1 | -2.2 |
| PF14_0176  | conserved Plasmodium protein, unknown function          |      | -2.1 |
| PF14_0213  | conserved Plasmodium protein, unknown function          |      | -2.0 |
| PF14_0303  | conserved Plasmodium protein, unknown function          |      | -2.1 |
| PF14_0343  | conserved Plasmodium protein, unknown function          |      | -2.0 |
| PF14_0453  | conserved Plasmodium protein, unknown function          |      | -2.3 |
| PF14_0468a | conserved Plasmodium protein, unknown function          |      | -2.5 |
| PF14_0472  | conserved Plasmodium protein, unknown function          | -2.4 | -2.2 |
| PF14_0480  | conserved Plasmodium protein, unknown function          |      | -2.1 |
| PF14_0487  | conserved Plasmodium protein, unknown function          |      | -2.4 |
| PF14_0499  | conserved Plasmodium protein, unknown function          |      | -2.1 |
| PF14_0506  | conserved Plasmodium protein, unknown function          |      | -2.8 |
| PF14_0544  | conserved Plasmodium protein, unknown function          |      | -2.0 |
| PF14_0552  | conserved Plasmodium protein, unknown function          |      | -2.2 |
| PF14_0567  | conserved Plasmodium protein, unknown function          |      | -2.1 |
| PF14_0607  | conserved Plasmodium membrane protein, unknown function |      | -2.1 |
| PF14_0613  | conserved Plasmodium membrane protein, unknown function |      | -2.0 |
| PF14_0682  | conserved Plasmodium membrane protein, unknown function |      | -2.0 |
| PF14_0708  | probable protein, unknown function                      |      | -2.1 |
| PFB0115w   | conserved Plasmodium protein, unknown function          |      | -2.1 |
| PFB0460c   | conserved Plasmodium protein, unknown function          |      | -2.0 |
| PFC0355c   | conserved Plasmodium protein, unknown function          | -2.0 | -2.2 |
| PFC0615w   | conserved Plasmodium protein, unknown function          |      | -2.0 |
| PFC0705c   | conserved Plasmodium protein, unknown function          |      | -2.2 |
| PFD0240c   | 6-cysteine protein                                      |      | -2.1 |
| PFD0400w   | conserved Plasmodium protein, unknown function          |      | -2.2 |
| PFD0445c   | conserved Plasmodium protein, unknown function          |      | -2.0 |
| PFD0585c   | conserved Plasmodium protein, unknown function          |      | -2.0 |
| PFD0715c   | conserved Plasmodium protein, unknown function          | -2.1 |      |
| PFE0650c   | conserved Plasmodium protein, unknown function          | -2.1 | -2.2 |
| PFE1130w   | conserved protein, unknown function                     |      | -2.3 |
| PFF0570c   | conserved Plasmodium protein, unknown function          |      | -2.1 |
| PFF0645c   | integral membrane protein                               | -2.0 | -2.5 |
| PFF0710w   | conserved Plasmodium protein, unknown function          |      | -2.1 |
| PFF0960c   | conserved Plasmodium protein, unknown function          |      | -2.0 |
| PFF1235w   | conserved Plasmodium membrane protein, unknown function |      | -2.1 |
| PFI0390c   | conserved Plasmodium membrane protein, unknown function |      | -2.4 |
| PFI0460w   | conserved Plasmodium protein, unknown function          |      | -2.1 |
| PFI0665w   | conserved Plasmodium protein, unknown function          |      | -2.0 |
| PFI0705w   | conserved Plasmodium protein, unknown function          | -2.2 | -2.0 |
| PFI0800c   | conserved Plasmodium protein, unknown function          |      | -2.2 |
| PFI1395w   | conserved Plasmodium membrane protein, unknown function |      | -2.2 |

**Table S4. Genes with  $\geq 2$ -fold changes in expression in Dd2 in response to DHA treatment (DHA/control)**

**Up-regulated**

| Gene ID                              | Gene Description                                        | Fold change |     |      |
|--------------------------------------|---------------------------------------------------------|-------------|-----|------|
|                                      |                                                         | R           | T   | S    |
| <b>Transport</b>                     |                                                         |             |     |      |
| PF11_0459                            | apicoplast import protein Tic20                         |             |     | 2.0  |
| PFD0900w                             | conserved Plasmodium protein, unknown function          |             | 2.4 |      |
| PFF0870w                             | conserved Plasmodium membrane protein, unknown function |             | 2.1 |      |
| PF10_0216                            | zinc transporter                                        | 2.0         |     | 2.1  |
| PFB0465c                             | monocarboxylate transporter                             |             |     | 2.3  |
| PFE0410w                             | triose phosphate transporter                            |             |     | 2.0  |
| <b>Transcription and translation</b> |                                                         |             |     |      |
| PF10_0143                            | transcriptional coactivator ADA2                        | 2.0         |     |      |
| PF10_0383                            | Plasmodium repeat_MYXSPDY protein                       |             |     | 2.2  |
| PF13_0305                            | elongation factor 1-alpha                               |             |     | 2.0  |
| MAL7P1.17                            | conserved Plasmodium membrane protein, unknown function |             | 2.1 |      |
| PF11_0442                            | transcription factor with AP2 domain(s)                 |             | 2.0 |      |
| PFI0540w                             | conserved Plasmodium protein, unknown function          |             | 2.0 |      |
| <b>Structure</b>                     |                                                         |             |     |      |
| PF13_0210                            | conserved Plasmodium protein, unknown function          |             | 2.1 | 2.0  |
| PF11_0146                            | conserved Plasmodium membrane protein, unknown function |             | 2.3 | 2.1  |
| <b>Signal transduction</b>           |                                                         |             |     |      |
| PF11_0242                            | calcium-dependent protein kinase 7                      |             |     | 2.3  |
| PF11_0464                            | serine/threonine protein kinase                         |             | 2.1 |      |
| MAL13P1.278                          | serine/threonine protein kinase                         | 2.1         | 2.0 |      |
| <b>Pathogenesis</b>                  |                                                         |             |     |      |
| PFI1745c                             | early transcribed membrane protein                      |             | 2.2 |      |
| MAL13P1.2                            | Rifin                                                   |             | 9.1 | 2.0  |
| PFE0070w                             | interspersed repeat antigen                             | 2.0         |     |      |
| MAL13P1.60                           | erythrocyte binding antigen-140                         |             | 3.0 |      |
| MAL13P1.535                          | rifin                                                   | 8.1         |     | 2.1  |
| PF08_0139                            | rifin                                                   |             |     | 3.0  |
| PF10_0397                            | rifin                                                   |             |     | 5.0  |
| PF14_0567                            | conserved Plasmodium protein, unknown function          |             |     | 2.0  |
| PFA0065w                             | Pfmc-2TM Maurer's cleft two transmembrane protein       |             |     | 12.3 |
| PFC1080c                             | Pfmc-2TM Maurer's cleft two transmembrane protein       |             |     | 2.2  |
| PFD0030c                             | rifin                                                   |             |     | 3.2  |
| PFA0680c                             | Pfmc-2TM Maurer's cleft two transmembrane protein       |             | 8.3 |      |
| <b>Motor activity</b>                |                                                         |             |     |      |
| PF07_0042                            | conserved Plasmodium protein, unknown function          |             | 2.1 |      |
| MAL13P1.260                          | alveolin                                                |             | 2.0 |      |
| PF11_0342                            | conserved Plasmodium protein, unknown function          | 2.0         |     |      |
| <b>Cell cycle and invasion</b>       |                                                         |             |     |      |
| MAL13P1.96                           | chromosome segregation protein                          | 2.0         |     |      |
| PFB0300c                             | merozoite surface protein 2                             |             | 2.3 |      |
| <b>Catalytic/Metabolic activity</b>  |                                                         |             |     |      |
| PFE0570w                             | RNA pseudouridylate synthase                            | 2.1         |     |      |
| PF14_0174                            | pseudouridine synthase                                  | 2.2         |     |      |
| PF14_0545                            | thioredoxin                                             | 2.4         | 2.0 | 2.0  |
| PF10_0121                            | hypoxanthine phosphoribosyltransferase                  |             |     | 2.1  |

|                                      |                                                                    |      |      |      |
|--------------------------------------|--------------------------------------------------------------------|------|------|------|
| PF10_0155                            | enolase                                                            |      |      | 2.0  |
| PF13_0028                            | membrane integral peptidase, M50 family                            |      |      | 2.1  |
| PF13_0141                            | L-lactate dehydrogenase                                            |      |      | 2.2  |
| PFE0915c                             | proteasome subunit beta type 1                                     |      |      | 2.0  |
| PFL0230w                             | cytidine/deoxycytidylate deaminase                                 |      |      | 2.0  |
| PFI1050c                             | Fe-S-cluster redox enzyme                                          | 2.1  |      | 2.0  |
| PF13_0083                            | lipoate protein ligase a type 1                                    |      |      | 2.1  |
| PFC0855w                             | ubiquitin conjugating enzyme                                       |      |      | 2.2  |
| MAL13P1.114                          | conserved Plasmodium protein, unknown function                     |      |      | 2.1  |
| <b>Binding</b>                       |                                                                    |      |      |      |
| PF13_0254                            | conserved Plasmodium membrane protein, unknown function            | 2.0  |      |      |
| PFL0290w                             | conserved Plasmodium protein, unknown function                     | 2.0  |      |      |
| PF14_0325                            | conserved Plasmodium membrane protein, unknown function            |      | 2.1  |      |
| PFD0110w                             | normocyte binding protein 1,reticulocyte binding protein homologue |      |      | 2.0  |
| MAL13P1.176                          | reticulocyte binding protein 2 homologue b                         |      |      | 2.0  |
| PFI1730w                             | cytoadherence linked asexual protein 9                             |      |      | 2.1  |
| <b>Unknown function</b>              |                                                                    |      |      |      |
| MAL13P1.295                          | conserved Plasmodium protein, unknown function                     | 2.1  |      |      |
| PF08_0035                            | conserved Plasmodium protein, unknown function                     |      | 2.2  |      |
| PF10_0138                            | conserved Plasmodium protein, unknown function                     |      | 2.1  |      |
| PF07_0097                            | conserved Plasmodium protein, unknown function                     | 2.0  |      |      |
| PF13_0161                            | conserved Plasmodium protein, unknown function                     | 2.0  | 2.1  |      |
| PF10_0207                            | conserved Plasmodium membrane protein, unknown function            |      |      | 2.0  |
| PF13_0331                            | conserved protein, unknown function                                |      |      | 2.1  |
| PFE0220w                             | conserved Plasmodium protein, unknown function                     |      |      | 2.2  |
| <b>Down</b>                          |                                                                    |      |      |      |
| <b>Transport</b>                     |                                                                    |      |      |      |
| MAL8P1.82                            | vacuolar sorting protein VPS9                                      |      |      | -2.1 |
| PF08_0093                            | mitochondrial carrier protein                                      |      | -2.2 |      |
| PFI1015w                             | conserved Plasmodium protein, unknown function                     |      |      | -2.0 |
| MAL13P1.232                          | mog1 homolog                                                       |      |      | -2.0 |
| PF14_0049                            | sybindin-like protein                                              | -2.1 |      |      |
| PF08_0078                            | ABC Transporter                                                    |      |      | -2.1 |
| <b>Translation and transcription</b> |                                                                    |      |      |      |
| PF14_0406                            | conserved Plasmodium protein, unknown function                     |      |      | -2.0 |
| PF14_0426                            | conserved Plasmodium protein, unknown function                     | -2.4 | -2.0 | -2.1 |
| PF14_0514                            | tRNA intron endonuclease                                           |      | -2.0 |      |
| PF14_0603                            | conserved Plasmodium protein, unknown function                     |      | -2.2 |      |
| PF14_0656                            | U2 snRNP auxiliary factor                                          |      |      | -2.1 |
| PFB0855c                             | apicoplast RNA methyltransferase precursor                         |      | -2.0 |      |
| PFD0355c                             | peptidyl-tRNA hydrolase PTH2                                       |      | -2.1 |      |
| PFL0145c                             | high mobility group protein                                        |      | -2.0 |      |
| PFL0665c                             | RNA polymerase subunit 8c                                          |      | -2.2 | -2.1 |
| PFL0690c                             | histone-lysine N-methyltransferase                                 |      | -2.1 | -2.0 |
| PFL1540c                             | phenylalanyl-tRNA synthetase alpha chain                           |      |      | -2.3 |
| MAL13P1.200                          | mitochondrial ribosomal protein L49 precursor                      |      |      | -2.0 |
| MAL13P1.272                          | 60S ribosomal protein L7-2                                         |      | -2.1 |      |
| MAL13P1.318                          | mitochondrial ribosomal protein L9 precursor                       |      |      | -2.1 |
| MAL13P1.92                           | 40S ribosomal protein S15/S19                                      |      |      | -2.1 |
| PF14_0205                            | 40S ribosomal protein S25                                          |      | -2.0 |      |
| PF14_0584                            | mitochondrial ribosomal protein S4/S9 precursor                    |      | -2.0 |      |
| PF14_0635                            | large ribosomal subunit assembling protein                         |      | -2.1 |      |
| PFB0467w                             | 50S ribosomal protein L33                                          |      |      | -2.0 |

|                            |                                                                  |      |      |
|----------------------------|------------------------------------------------------------------|------|------|
| PFB0885w                   | 40S ribosomal protein S30                                        | -2.2 |      |
| PFC0200w-a                 | 60S ribosomal protein L44                                        | -2.1 |      |
| PFC0290w                   | 40S ribosomal protein S23                                        | -2.3 |      |
| PFC0295c                   | 40S ribosomal protein S12                                        | -2.1 |      |
| PFC0400w                   | 60S acidic ribosomal protein P2                                  | -2.0 |      |
| PFC0535w                   | 60S ribosomal protein L26                                        | -2.0 |      |
| PFL1150c                   | mitochondrial ribosomal protein L24-2 precursor                  | -2.3 | -2.1 |
| MAL13P1.327                | mitochondrial ribosomal protein S17 precursor                    |      | -2.2 |
| PFL2095w                   | translation initiation factor SUI1                               |      | -2.1 |
| PFL2240w                   | conserved Plasmodium protein, unknown function                   | -2.0 |      |
| PFL2300w                   | conserved Plasmodium protein, unknown function                   |      | -2.1 |
| PF07_0012                  | conserved Plasmodium protein, unknown function                   |      | -2.0 |
| PFL0625c                   | eukaryotic translation initiation factor 3 subunit 10            |      | -2.2 |
| PFF0200c                   | transcription factor with AP2 domain(s),SPE2-interacting protein |      | -2.1 |
| PFA0525w                   | transcription initiation factor TFIIB                            | -2.1 | -2.0 |
| PFA0355w                   | carbon catabolite repressor protein 4                            |      | -2.1 |
| PFE0105c                   | HCNGP-like protein                                               | -2.1 | -2.2 |
| MAL13P1.336                | conserved Plasmodium protein, unknown function                   |      | -2.1 |
| PFA0565c                   | conserved Plasmodium protein, unknown function                   | -2.2 |      |
| PFL1510c                   | conserved Plasmodium protein, unknown function                   |      | -2.0 |
| <b>Structure</b>           |                                                                  |      |      |
| MAL13P1.413                | membrane associated histidine-rich protein                       |      | -2.0 |
| PF07_0054                  | histone H2B variant                                              |      | -2.0 |
| PF11_0062                  | histone H2B                                                      | -2.0 | -2.1 |
| PF11_0267                  | kelch protein                                                    |      | -2.0 |
| PFC0416w                   | conserved Plasmodium protein, unknown function                   | -2.0 |      |
| PFE1285w                   | membrane skeletal protein IMC1-related                           |      | -2.1 |
| PFE1550w                   | conserved Plasmodium protein, unknown function                   | -2.0 |      |
| PFF0860c                   | histone H2A                                                      |      | -2.1 |
| PFF0865w                   | histone H3 variant                                               |      | -2.0 |
| PFF1480w                   | microtubule-associated protein ytm1 homologue                    | -2.5 |      |
| PFI1070c                   | nucleolar preribosomal assembly protein                          | -2.1 | -2.0 |
| <b>Signal transduction</b> |                                                                  |      |      |
| PF14_0407                  | guanine nucleotide exchange factor                               |      | -2.0 |
| PF14_0733                  | serine/threonine protein kinase, FIKK family                     | -2.1 |      |
| PF14_0734                  | serine/threonine protein kinase, FIKK family                     | -2.0 |      |
| PFA0130c                   | serine/threonine protein kinase, FIKK family                     |      | -2.2 |
| <b>Pathogenesis</b>        |                                                                  |      |      |
| PFE1590w                   | early transcribed membrane protein 5                             | -2.0 |      |
| MAL13P1.269                | tryptophan-rich antigen                                          |      | -2.0 |
| MAL13P1.490                | stevor                                                           |      | -5.1 |
| MAL13P1.495                | rifin                                                            |      | -3.0 |
| MAL13P1.59                 | Plasmodium exported protein (PHISTa), unknown function           |      | -2.3 |
| MAL7P1.208                 | rhoptry-associated membrane antigen                              |      | -2.1 |
| PF10_0390                  | Pfmc-2TM Maurer's cleft two transmembrane protein                | -2.4 |      |
| PF11_0014                  | PfMC-2TM_11.1                                                    | -3.1 | -2.2 |
| PF11_0111                  | asparagine-rich antigen                                          |      | -2.1 |
| PFA0030c                   | rifin                                                            | -3.2 |      |
| PFA0125c                   | erythrocyte Binding antigen-181                                  |      | -2.2 |
| PFB0056c                   | hypothetical protein                                             |      | -2.0 |
| PFB0110w                   | Plasmodium exported protein (hyp11), unknown function            | -3.5 |      |
| PFB1010w                   | rifin                                                            | -3.1 |      |
| PFD1200c                   | Plasmodium exported protein (hyp6), unknown function             | -2.0 |      |

|                                      |                                                        |      |      |      |
|--------------------------------------|--------------------------------------------------------|------|------|------|
| PFE0830c                             | sporozoite surface antigen MB2                         |      |      | -2.2 |
| PPF1525c                             | Pfmc-2TM Maurer's cleft two transmembrane protein      | -2.1 | -3.0 |      |
| PPF1570w                             | rifin                                                  |      | -2.1 |      |
| PFI0450c                             | apoptosis-related protein                              |      | -2.0 |      |
| PFI1805w                             | rifin                                                  |      | -2.1 | -2.0 |
| PFI1810w                             | rifin                                                  |      | -2.3 | -2.1 |
| PFL0050c                             | Plasmodium exported protein (PHISTb), unknown function |      |      | -2.0 |
| PFL2585c                             | rifin                                                  |      | -2.2 | -2.5 |
| PFL2590w                             | Plasmodium exported protein (PHISTa), unknown function |      |      | -2.1 |
| PFA0700c                             | Plasmodium exported protein (hyp10), unknown function  |      |      | -2.0 |
| PF14_0753                            | Plasmodium exported protein (hyp13), unknown function  |      | -2.2 |      |
| PF10_0115                            | QF122 antigen                                          | -2.1 |      |      |
| PFA0020w                             | rifin                                                  |      | -2.8 |      |
| PFC0045w                             | rifin                                                  |      |      | -2.2 |
| PFD0015c                             | rifin                                                  |      | -2.0 |      |
| PPF0855c                             | rifin                                                  |      |      | -2.0 |
| PPF1575w                             | rifin                                                  | -2.2 |      |      |
| PPF0850c                             | stevor                                                 |      |      | -2.1 |
| PFC0640w                             | CSP and TRAP-related protein                           | -2.2 |      |      |
| <b>Motor activity</b>                |                                                        |      |      |      |
| MAL7P1.161                           | dynein light chain                                     |      | -2.2 |      |
| PFB0196c                             | dynein light chain                                     |      | -2.0 |      |
| PFE1173c                             | outer arm dynein lc3                                   |      |      | -2.1 |
| PF14_0082                            | conserved Plasmodium protein, unknown function         | -3.4 | -2.1 | -2.0 |
| PFE1485w                             | conserved Plasmodium protein, unknown function         |      |      | -2.1 |
| <b>DNA replication and repairing</b> |                                                        |      |      |      |
| PFD0590c                             | DNA polymerase alpha                                   |      |      | -2.0 |
| PFL0755c                             | conserved Plasmodium protein, unknown function         |      |      | -2.1 |
| PF14_0316                            | DNA topoisomerase II                                   |      | -2.1 |      |
| <b>Chaperone</b>                     |                                                        |      |      |      |
| PPF1050w                             | nascent polypeptide associated complex alpha chain     |      | -2.0 |      |
| PFE0135w                             | DnaJ protein                                           |      | -2.0 |      |
| PFI0220w                             | prefoldin subunit                                      |      | -2.1 |      |
| PFI0985c                             | chaperone                                              |      | -2.0 |      |
| PFL0740c                             | 10 kd chaperonin                                       |      | -2.2 | -2.1 |
| PFL1470c                             | WD-repeat protein                                      |      | -2.0 | -2.0 |
| PF08_0032                            | DnaJ protein                                           | -2.1 |      |      |
| PF11_0175                            | heat shock protein 101                                 | -2.2 |      |      |
| MAL13P1.341                          | ribosome biogenesis protein MRT4                       |      |      | -2.2 |
| PFC0800w                             | band 7-related protein                                 |      | -2.2 |      |
| PF14_0061                            | PPR repeat protein                                     |      |      | -2.0 |
| <b>Cell cycle and invasion</b>       |                                                        |      |      |      |
| PFC0165w                             | spindle pole body protein                              |      |      | -2.2 |
| PFE1430c                             | cyclophilin                                            |      | -2.0 |      |
| PFI1490c-a                           | cyclophilin-like protein                               |      |      | -2.0 |
| PF13_0193                            | MSP7-like protein                                      | -2.0 |      | -2.4 |
| PFL1330c                             | cyclin                                                 |      |      | -2.1 |
| PFI1475w                             | merozoite surface protein 1                            |      |      | -2.0 |
| PF11_0249                            | conserved Plasmodium protein, unknown function         |      |      | -2.2 |
| <b>Catalytic/Metabolic activity</b>  |                                                        |      |      |      |
| MAL13P1.153                          | ribonuclease P protein subunit rpr                     |      |      | -2.0 |
| MAL13P1.285                          | patatin-like phospholipase                             |      |      | -2.1 |
| MAL13P1.326                          | ferrochelatase                                         |      |      | -2.0 |

|             |                                                               |      |      |      |
|-------------|---------------------------------------------------------------|------|------|------|
| MAL13P1.344 | RNAse L inhibitor protein                                     |      |      | -2.0 |
| MAL13P1.55  | cytochrome c2 precursor                                       |      |      | -2.1 |
| MAL13P1.56  | M1-family alanyl aminopeptidase                               |      |      | -2.2 |
| MAL7P1.159  | 1-cys peroxiredoxin                                           |      |      | -2.1 |
| PF08_0071   | Fe-superoxide dismutase                                       | -2.0 |      |      |
| PF08_0131   | 1-cys peroxiredoxin                                           | -2.0 |      |      |
| PF10_0150   | methionine aminopeptidase 1b                                  | -2.2 |      |      |
| PF10_0245   | glucosamine-fructose-6-phosphate aminotransferase             |      | -2.1 |      |
| PF11_0036   | flavoprotein                                                  |      |      | -2.0 |
| PF11_0050   | conserved Plasmodium protein, unknown function                |      |      | -2.1 |
| PF11_0452   | conserved Plasmodium protein, unknown function                | -2.1 |      |      |
| PF14_0015   | aminopeptidase                                                | -2.0 |      |      |
| PF14_0017   | lysophospholipase                                             |      |      | -2.0 |
| PF14_0076   | plasmepsin I                                                  | -2.2 |      |      |
| PF14_0164   | NADP-specific glutamate dehydrogenase                         | -2.0 |      |      |
| PF14_0187   | glutathione S-transferase                                     | -3.1 | -2.0 | -2.3 |
| PF14_0246   | phosphoenolpyruvate carboxylase                               |      | -2.0 |      |
| PF14_0346   | cGMP-dependent protein kinase                                 |      | -2.2 |      |
| PF14_0466   | Appr-1-p processing domain protein                            |      | -2.1 |      |
| PF14_0534   | serine hydroxymethyltransferase                               |      | -2.0 |      |
| PF14_0541   | V-type H( )-translocating pyrophosphatase                     | -2.2 |      |      |
| PF14_0598   | glyceraldehyde-3-phosphate dehydrogenase                      |      | -2.1 |      |
| PF14_0677   | RNA 3'-terminal phosphate cyclase-like protein                |      | -2.0 |      |
| PF14_0761   | acyl-CoA synthetase                                           |      | -2.0 |      |
| PF14_0784   | ribosome biogenesis protein, NOP10-like                       |      | -2.2 |      |
| PFA0455c    | fatty acid elongation protein, GNS1/SUR4 family               |      | -2.0 |      |
| PFA0540c    | conserved Plasmodium protein, unknown function                |      |      | -2.0 |
| PFC0050c    | acyl-CoA synthetase                                           |      | -2.1 |      |
| PFC0271c    | glutaredoxin 1                                                |      | -2.1 | -2.0 |
| PFC0275w    | FAD-dependent glycerol-3-phosphate dehydrogenase              |      | -2.2 |      |
| PFC0975c    | peptidyl-prolyl cis-trans isomerase                           |      | -2.0 |      |
| PFD1007w    | conserved Plasmodium protein, unknown function                | -2.1 |      |      |
| PFE0605c    | glutathione synthetase                                        |      | -2.2 |      |
| PFE0630c    | orotate phosphoribosyltransferase                             | -2.1 | -2.3 |      |
| PFE0670w    | mitochondrial matrix protein                                  |      | -2.0 |      |
| PFE0730c    | ribose 5-phosphate epimerase                                  |      | -2.0 |      |
| PFE0755c    | rhomboid protease ROM9                                        |      | -2.1 |      |
| PFE1120w    | conserved Plasmodium protein, unknown function                |      | -2.2 |      |
| PFF1025c    | SNO glutamine amidotransferase family protein                 |      | -2.1 |      |
| PFF1080w    | conserved Apicomplexan protein, unknown function              |      | -2.0 |      |
| PFF1335c    | 4-methyl-5(B-hydroxyethyl)-thiazol monophosphate biosynthesis |      | -2.1 |      |
| PFF1350c    | acetyl-CoA synthetase                                         | -2.0 |      |      |
| PFF1360w    | 6-pyruvoyltetrahydropterin synthase                           |      | -2.1 |      |
| PFF1405c    | conserved protein, unknown function                           |      | -2.0 |      |
| PFI0755c    | 6-phosphofructokinase                                         | -2.1 |      |      |
| PFI0795w    | conserved Plasmodium protein, unknown function                |      |      | -2.1 |
| PFI0815c    | methyltransferase                                             |      | -2.4 |      |
| PFI0920c    | dihydrouridine synthase                                       | -2.0 |      |      |
| PFI0965w    | pyridoxal 5'-phosphate dependent enzyme class III             |      | -2.1 |      |
| PFI1020c    | inosine-5'-monophosphate dehydrogenase                        |      |      | -2.1 |
| PFI1135c    | OTU-like cysteine protease                                    |      | -2.2 | -2.0 |
| PFI1170c    | thioredoxin reductase                                         | -2.1 |      |      |
| PFL0035c    | acyl-CoA synthetase, PfACS7                                   | -2.0 |      |      |

|             |                                                                  |      |      |
|-------------|------------------------------------------------------------------|------|------|
| PFL0300c    | protein phosphatase                                              | -2.1 |      |
| PFL0320w    | rhodanese like protein                                           |      | -2.0 |
| PFL0590c    | non-SERCA-type Ca2 -transporting P-ATPase                        |      | -2.1 |
| PFL0595c    | glutathione peroxidase                                           | -2.2 |      |
| PFL0705c    | adrenodoxin-type ferredoxin                                      | -2.1 | -2.0 |
| PFL0710w    | conserved Plasmodium protein, unknown function                   | -2.0 | -2.2 |
| PFL1555w    | cytochrome b5                                                    | -2.0 | -2.1 |
| PFL1720w    | serine hydroxymethyltransferase                                  | -2.2 |      |
| PFL1885c    | protein kinase 2                                                 |      | -2.1 |
| PF11_0257   | ethanolamine kinase                                              |      | -2.0 |
| PFL0620c    | glycerol-3-phosphate acyltransferase                             | -2.2 | -2.0 |
| PF11_0395   | guanylyl cyclase                                                 |      | -2.1 |
| PFL1890c    | HD superfamily phosphohydrolase protein                          | -2.0 |      |
| PFB0345c    | serine repeat antigen 4                                          |      | -2.2 |
| PFB0340c    | serine repeat antigen 5                                          | -2.0 |      |
| PFE0555w    | stearoyl-CoA delta 9 desaturase                                  |      | -2.1 |
| PFL1700c    | V-type K -independent H -translocating inorganic pyrophosphatase | -2.0 |      |
| MAL7P1.130  | 3-demethylubiquinone-9 3-methyltransferase                       |      | -2.1 |
| PF13_0347   | conserved Plasmodium protein, unknown function                   | -2.0 |      |
| PFA0530c    | adenylate kinase                                                 | -2.3 |      |
| PFE1100w    | conserved Plasmodium protein, unknown function                   |      | -2.1 |
| PFE1235c    | ubiquitin fusion degradation protein UFD1                        |      | -2.2 |
| MAL13P1.205 | Rab GTPase 11b                                                   | -2.0 |      |
| PF13_0301   | ubiquitin conjugating enzyme                                     | -2.1 |      |
| PFB0815w    | calcium dependent protein kinase 1                               |      | -2.0 |
| PF08_0007   | conserved Plasmodium protein, unknown function                   | -2.1 |      |

### Binding

|              |                                                 |      |      |
|--------------|-------------------------------------------------|------|------|
| PFD0365c     | conserved Plasmodium protein, unknown function  | -2.3 | -2.1 |
| PFE1425c     | conserved Plasmodium protein, unknown function  |      | -2.1 |
| PF10_0072    | conserved Plasmodium protein, unknown function  | -3.0 |      |
| PF10_0042    | conserved Plasmodium protein, unknown function  | -2.1 |      |
| PF10_0063    | DNA/RNA-binding protein Alba                    | -2.0 |      |
| MAL7P1.102   | conserved Plasmodium protein, unknown function  |      | -2.1 |
| PFF0400w     | conserved Plasmodium protein, unknown function  |      | -2.0 |
| PFF1230c     | conserved Plasmodium protein, unknown function  |      | -2.1 |
| PFD0345c     | conserved Plasmodium protein, unknown function  | -2.0 |      |
| MAL13P1.163- | ER lumen protein retaining receptor 1           | -2.1 |      |
| MAL8P1.101   | RNA Binding protein                             |      | -2.1 |
| MAL8P1.70    | conserved Plasmodium protein, unknown function  |      | -2.0 |
| PF08_0099    | acyl-CoA binding protein                        |      | -2.2 |
| PF10_0047    | RNA Binding protein                             |      | -2.0 |
| PF10_0156    | conserved Plasmodium protein, unknown function  |      | -2.1 |
| PF10_0351    | probable protein, unknown function              |      | -2.0 |
| PF10_0357    | probable protein, unknown function              |      | -2.3 |
| PFB0735c     | conserved Plasmodium protein, unknown function  | -2.1 |      |
| PFD0115c     | Plasmodium exported protein, unknown function   | -2.0 | -2.2 |
| PFD0807c     | PfMNL-2 CISD1-like iron-sulfur protein          |      | -2.0 |
| PFE0665c     | GTP binding protein                             | -2.1 |      |
| PFI0328c     | leucine-rich repeat protein                     | -2.0 |      |
| PFI0885w     | cytochrome b5-like heme/steroid binding protein | -2.2 |      |
| PFL2040w     | conserved Plasmodium protein, unknown function  |      | -2.2 |
| PF13_0249    | conserved Plasmodium protein, unknown function  | -2.1 |      |
| PFC1060c     | conserved Plasmodium protein, unknown function  |      | -2.0 |



|                         |                                                         |  |      |      |
|-------------------------|---------------------------------------------------------|--|------|------|
| PF13_0338               | cysteine-rich surface protein                           |  |      | -2.1 |
| PF14_0433               | erythrocyte membrane-like protein                       |  |      | -2.0 |
| PF11_0243               | leucine-rich repeat protein                             |  |      | -2.4 |
| PF08_0136b              | von Willebrand factor A-domain related protein          |  |      | -2.0 |
| <b>Unknown function</b> |                                                         |  |      |      |
| PFB0877c                | probable protein, unknown function                      |  |      | -2.3 |
| PFD0270c                | conserved Plasmodium protein, unknown function          |  |      | -2.0 |
| PFE1260c                | conserved Plasmodium protein, unknown function          |  |      | -2.1 |
| MAL13P1.295             | conserved Plasmodium protein, unknown function          |  |      | -2.2 |
| MAL13P1.215             | conserved Plasmodium protein, unknown function          |  |      | -2.0 |
| MAL8P1.36               | conserved Plasmodium protein, unknown function          |  |      | -2.1 |
| PF08_0072               | conserved Plasmodium protein, unknown function          |  |      | -2.2 |
| PFD0290w                | conserved Plasmodium protein, unknown function          |  | -2.0 |      |
| MAL13P1.37              | conserved Plasmodium protein, unknown function          |  | -2.1 |      |
| MAL7P1.167              | conserved Plasmodium protein, unknown function          |  |      | -2.3 |
| PF10_0100               | conserved Plasmodium protein, unknown function          |  |      | -2.0 |
| PF10_0109               | conserved Plasmodium protein, unknown function          |  | -2.0 | -2.1 |
| PF13_0263               | conserved Plasmodium protein, unknown function          |  | -2.2 | -2.0 |
| PFB0886c                | conserved Plasmodium protein, unknown function          |  | -2.0 |      |
| PFI0655c                | conserved Plasmodium protein, unknown function          |  | -2.1 |      |
| MAL8P1.84               | conserved Plasmodium protein, unknown function          |  | -2.0 |      |
| PFE0345c                | conserved Plasmodium protein, unknown function          |  | -2.2 |      |
| MAL7P1.123              | conserved Plasmodium protein, unknown function          |  | -2.0 |      |
| MAL7P1.14               | conserved Plasmodium protein, unknown function          |  |      | -2.3 |
| PF13_0335               | conserved Plasmodium protein, unknown function          |  | -2.2 |      |
| PFA0395w                | conserved Plasmodium protein, unknown function          |  | -2.0 |      |
| PF10_0373a              | conserved Plasmodium protein, unknown function          |  | -2.0 | -2.1 |
| PF13_0218a              | conserved Plasmodium protein, unknown function          |  | -2.3 |      |
| PFA0230c                | conserved Plasmodium protein, unknown function          |  | -2.0 |      |
| PFA0315w                | conserved Plasmodium protein, unknown function          |  | -2.4 |      |
| PFA0560c                | conserved Plasmodium protein, unknown function          |  | -2.2 | -2.0 |
| PFB0423c                | conserved protein, unknown function                     |  | -2.2 | -2.2 |
| PFC0940c                | conserved Plasmodium protein, unknown function          |  | -2.1 |      |
| PFE0600c                | conserved Plasmodium protein, unknown function          |  | -2.0 |      |
| PFF0310w                | conserved Plasmodium protein, unknown function          |  |      | -2.2 |
| PFF1270c                | conserved Plasmodium protein, unknown function          |  | -2.1 |      |
| PFL1165w                | conserved Plasmodium protein, unknown function          |  |      | -2.3 |
| MAL13P1.49              | conserved Plasmodium protein, unknown function          |  | -2.2 |      |
| MAL8P1.18               | conserved Plasmodium protein, unknown function          |  | -2.1 |      |
| MAL13P1.181             | conserved Plasmodium membrane protein, unknown function |  |      | -2.3 |
| MAL13P1.236             | conserved Plasmodium protein, unknown function          |  | -2.2 |      |
| MAL13P1.237             | conserved Plasmodium protein, unknown function          |  | -2.0 |      |
| MAL13P1.253             | small nuclear ribonucleoprotein                         |  | -2.1 |      |
| MAL13P1.262             | conserved Plasmodium protein, unknown function          |  |      | -2.3 |
| MAL13P1.331             | conserved Plasmodium protein, unknown function          |  | -2.1 |      |
| MAL13P1.370             | conserved Plasmodium membrane protein, unknown function |  |      | -2.0 |
| MAL13P1.46              | conserved Plasmodium protein, unknown function          |  | -2.2 |      |
| MAL13P1.465             | Plasmodium exported protein, unknown function           |  | -2.1 |      |
| MAL13P1.480             | histidine-rich protein III                              |  |      | -2.0 |
| MAL13P1.53              | conserved Plasmodium protein, unknown function          |  | -2.1 | -2.0 |
| MAL13P1.580             | conserved Plasmodium protein, unknown function          |  |      | -2.2 |
| MAL13P1.91              | conserved Plasmodium protein, unknown function          |  |      | -2.0 |
| MAL7P1.141              | conserved Plasmodium protein, unknown function          |  |      | -2.1 |

|            |                                                         |      |      |      |
|------------|---------------------------------------------------------|------|------|------|
| MAL7P1.98  | conserved Plasmodium protein, unknown function          | -2.0 | -2.3 | -2.0 |
| PF07_0011  | conserved Plasmodium protein, unknown function          | -2.2 | -2.0 |      |
| PF08_0001  | Plasmodium exported protein, unknown function           |      |      | -2.0 |
| PF08_0043  | conserved Plasmodium protein, unknown function          |      | -2.0 |      |
| PF08_0082  | conserved Plasmodium protein, unknown function          |      |      | -2.2 |
| PF08_0116  | conserved Plasmodium protein, unknown function          |      |      | -2.0 |
| PF10_0258  | conserved Plasmodium protein, unknown function          |      |      | -2.1 |
| PF10_0359  | conserved Plasmodium protein, unknown function          |      | -2.2 |      |
| PF11_0346  | conserved Plasmodium protein, unknown function          | -2.0 | -2.1 |      |
| PF11_0455  | conserved Plasmodium protein, unknown function          |      | -2.0 |      |
| PF14_0180  | conserved Plasmodium protein, unknown function          |      |      | -2.1 |
| PF14_0184  | conserved Plasmodium protein, unknown function          |      |      | -2.2 |
| PF14_0189  | conserved Plasmodium protein, unknown function          | -2.1 |      | -2.3 |
| PF14_0217  | conserved Plasmodium protein, unknown function          |      |      | -2.0 |
| PF14_0336  | conserved Plasmodium protein, unknown function          | -2.0 |      |      |
| PF14_0442  | conserved Plasmodium protein, unknown function          |      |      | -2.1 |
| PF14_0457  | conserved Plasmodium protein, unknown function          |      | -2.0 |      |
| PF14_0461  | conserved Plasmodium protein, unknown function          |      |      | -2.1 |
| PF14_0477a | conserved Plasmodium protein, unknown function          |      | -2.5 |      |
| PF14_0499  | conserved Plasmodium protein, unknown function          |      |      | -2.1 |
| PF14_0536  | conserved Plasmodium protein, unknown function          |      | -2.0 |      |
| PF14_0566  | conserved protein, unknown function                     | -2.1 |      | -2.2 |
| PF14_0568  | conserved Plasmodium protein, unknown function          |      | -2.0 |      |
| PF14_0604  | conserved Plasmodium protein, unknown function          | -2.2 |      |      |
| PF14_0613  | conserved Plasmodium membrane protein, unknown function |      |      | -2.0 |
| PF14_0645  | conserved Plasmodium protein, unknown function          |      | -2.2 |      |
| PF14_0670  | conserved Plasmodium protein, unknown function          |      | -2.7 |      |
| PF14_0705  | conserved Plasmodium protein, unknown function          |      | -2.1 |      |
| PF14_0728  | conserved Plasmodium protein, unknown function          |      | -2.0 |      |
| PF14_0790  | conserved Plasmodium protein, unknown function          |      | -2.1 |      |
| PFA0270c   | conserved Plasmodium protein, unknown function          |      | -2.0 |      |
| PFA0635c   | Plasmodium exported protein (hyp1), unknown function    |      | -2.0 |      |
| PFB0620w   | conserved protein, unknown function                     |      | -2.2 |      |
| PFB0660w   | conserved Plasmodium protein, unknown function          | -2.0 |      |      |
| PFB0946c   | conserved Plasmodium falciparum protein family          |      |      | -2.1 |
| PFB0972w   | hypothetical protein                                    | -2.0 |      |      |
| PFC0070c   | Plasmodium exported protein, unknown function           | -2.0 |      |      |
| PFC0075c   | Plasmodium exported protein, unknown function           |      |      | -2.0 |
| PFC0705c   | conserved Plasmodium protein, unknown function          |      |      | -2.1 |
| PFC1025w   | conserved Plasmodium protein, unknown function          | -2.1 |      |      |
| PFD0155c   | conserved Plasmodium protein, unknown function          |      |      | -2.3 |
| PFD0520c   | conserved Plasmodium protein, unknown function          | -2.1 |      | -2.4 |
| PFD0890w   | conserved Plasmodium protein, unknown function          | -2.2 | -2.3 |      |
| PFD0925w   | conserved Plasmodium protein, unknown function          |      | -2.0 |      |
| PFD1030c   | conserved Plasmodium protein, unknown function          |      |      | -2.2 |
| PFE0390w   | conserved Plasmodium protein, unknown function          |      | -2.0 |      |
| PFE0565w   | conserved Plasmodium protein, unknown function          |      |      | -2.1 |
| PFE0990w   | conserved Plasmodium protein, unknown function          |      |      | -2.0 |
| PFE1065w   | conserved Plasmodium protein, unknown function          |      | -2.2 |      |
| PFE1110w   | conserved Plasmodium protein, unknown function          |      |      | -2.0 |
| PFE1300w   | conserved Plasmodium membrane protein, unknown function |      | -2.1 |      |
| PFE1610w   | Plasmodium exported protein, unknown function           | -2.1 |      |      |
| PFF0210w   | conserved Plasmodium protein, unknown function          |      | -2.0 |      |

|             |                                                         |      |      |
|-------------|---------------------------------------------------------|------|------|
| PFF0240c    | conserved Plasmodium protein, unknown function          | -2.1 |      |
| PFF0725w    | conserved Plasmodium protein, unknown function          |      | -2.1 |
| PFF0810c    | conserved Plasmodium protein, unknown function          | -2.2 |      |
| PFF0920c-a  | conserved Plasmodium protein, unknown function          |      | -2.1 |
| PFF1005w    | conserved Plasmodium protein, unknown function          |      | -2.0 |
| PFF1310c    | conserved Plasmodium protein, unknown function          |      | -2.1 |
| PFI0090c    | probable protein, unknown function                      | -2.2 |      |
| PFI0336w    | conserved Plasmodium protein, unknown function          | -2.1 |      |
| PFI0560c-a  | conserved Plasmodium protein, unknown function          |      | -2.0 |
| PFI0780w    | conserved Plasmodium protein, unknown function          |      | -2.1 |
| PFI0825w    | conserved Plasmodium protein, unknown function          | -2.5 |      |
| PFI0845w    | conserved Plasmodium membrane protein, unknown function | -2.4 |      |
| PFI0995w    | conserved Plasmodium protein, unknown function          | -2.2 |      |
| PFI1055w    | conserved Plasmodium protein, unknown function          |      | -2.0 |
| PFI1281w    | conserved Plasmodium protein, unknown function          |      | -2.1 |
| PFI1390w    | conserved Plasmodium protein, unknown function          | -2.2 | -2.0 |
| PFI1400c    | conserved Plasmodium protein, unknown function          | -2.1 |      |
| PFI1675w    | conserved Plasmodium protein, unknown function          |      | -3.1 |
| PFL0140w    | conserved Plasmodium protein, unknown function          | -2.1 | -2.0 |
| PFL0165c    | conserved Plasmodium protein, unknown function          | -2.2 | -2.1 |
| PFL0340w    | conserved Plasmodium protein, unknown function          |      | -2.0 |
| PFL0345w    | conserved Plasmodium protein, unknown function          |      | -2.1 |
| PFL0490c    | conserved Plasmodium protein, unknown function          | -2.1 | -2.5 |
| PFL0525w    | conserved Plasmodium protein, unknown function          | -2.4 | -2.0 |
| PFL0640w    | conserved Plasmodium protein, unknown function          |      | -2.2 |
| PFL0845w    | conserved Plasmodium protein, unknown function          | -2.1 |      |
| PFL1130c    | conserved Plasmodium protein, unknown function          |      | -2.1 |
| PFL1495w    | conserved Plasmodium protein, unknown function          |      | -2.0 |
| PFL1505c    | conserved Plasmodium protein, unknown function          |      | -2.4 |
| PFL1815c    | conserved Plasmodium protein, unknown function          |      | -2.1 |
| PFL1840w    | conserved Plasmodium membrane protein, unknown function | -2.3 |      |
| PFL2075c    | conserved Plasmodium protein, unknown function          | -2.0 | -2.2 |
| PFL2078w    | conserved Plasmodium protein, unknown function          | -2.1 |      |
| PFL2200w    | conserved Plasmodium protein, unknown function          | -2.7 | -2.0 |
| PFL2265c    | conserved Plasmodium protein, unknown function          | -2.1 |      |
| PFL2335w    | conserved Plasmodium protein, unknown function          |      | -2.0 |
| PFL2350c    | conserved Plasmodium membrane protein, unknown function | -2.2 | -2.0 |
| MAL13P1.315 | conserved Plasmodium protein, unknown function          | -2.0 |      |
| MAL7P1.129  | conserved Plasmodium protein, unknown function          |      | -2.1 |
| MAL8P1.29   | conserved Plasmodium protein, unknown function          | -2.2 |      |
| PF08_0005   | conserved Plasmodium protein, unknown function          | -2.1 |      |
| PF11_0343   | conserved Plasmodium protein, unknown function          |      | -2.0 |
| PF11_0354   | conserved Plasmodium protein, unknown function          |      | -2.1 |
| PF13_0277   | conserved Plasmodium protein, unknown function          |      | -2.3 |
| PFD0150w    | conserved Plasmodium protein, unknown function          |      | -2.0 |
| PF14_0708   | probable protein, unknown function                      |      | -2.1 |

---

|             |                                                         |      |      |      |
|-------------|---------------------------------------------------------|------|------|------|
| PFI1620c    | conserved Plasmodium protein, unknown function          |      |      | -2.0 |
| PFL0165c    | conserved Plasmodium protein, unknown function          |      |      | -2.1 |
| PFL0275w    | conserved Plasmodium protein, unknown function          |      |      | -2.0 |
| PFL0350c    | conserved Plasmodium protein, unknown function          |      |      | -2.1 |
| PFL0470w    | conserved Plasmodium protein, unknown function          | -2.2 |      |      |
| PFL1015w-a  | conserved Plasmodium protein, unknown function          | -2.1 | -2.0 |      |
| PFL1160c    | conserved Plasmodium protein, unknown function          | -2.1 | -2.2 |      |
| PFL1495w    | conserved Plasmodium protein, unknown function          |      |      | -2.1 |
| PFL1865w    | conserved Plasmodium protein, unknown function          |      |      | -2.0 |
| MAL13P1.228 | conserved Plasmodium protein, unknown function          |      |      | -2.1 |
| MAL13P1.49  | conserved Plasmodium protein, unknown function          |      |      | -2.0 |
| MAL8P1.18   | conserved Plasmodium protein, unknown function          | -2.1 |      | -2.2 |
| PF10_0138   | conserved Plasmodium protein, unknown function          | -2.0 | -2.1 |      |
| PF11_0158   | conserved Plasmodium protein, unknown function          | -2.0 | -2.0 | -2.4 |
| PF13_0067   | conserved Plasmodium protein, unknown function          |      | -2.1 | -2.2 |
| PF13_0079   | conserved Plasmodium protein, unknown function          |      | -2.0 | -2.1 |
| PFC0940c    | conserved Plasmodium protein, unknown function          | -2.1 |      | -2.4 |
| PF13_0199   | conserved Plasmodium protein, unknown function          |      |      | -3.1 |
| PF11_0185   | conserved Plasmodium protein, unknown function          |      |      | -2.0 |
| PF11_0415   | conserved Plasmodium protein, unknown function          |      | -2.1 |      |
| PF11_0290   | conserved Plasmodium protein, unknown function          | -2.2 |      |      |
| PFD1115c    | conserved Plasmodium protein, unknown function          |      |      | -2.4 |
| PFE0395c    | 6-cysteine protein                                      |      |      | -2.1 |
| PFE1515w    | conserved Plasmodium membrane protein, unknown function |      | -2.0 |      |
| PFI0270w    | conserved Plasmodium protein, unknown function          |      | -2.0 |      |
| MAL13P1.94  | conserved Plasmodium membrane protein, unknown function |      |      | -2.2 |
| PFI1560c    | conserved Plasmodium membrane protein, unknown function | -2.4 |      | -2.0 |

---
